# Supplementary material for: Unprecedented synthesis of a 14-membered hexaazamacrocycle
Source: publisher site journal article supplement (doi:10.3762/bjoc.19.126), 2023-11-15
Supplement: Additional file 1 [file 1860-5397-19-126-S1.pdf]

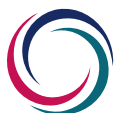

## Supporting Information

for

### Unprecedented synthesis of a 14-membered hexaazamacrocyclic

Anastasia A. Fesenko and Anatoly D. Shutalev

*Beilstein J. Org. Chem.* **2023**, *19*, 1728–1740. [doi:10.3762/bjoc.19.126](https://doi.org/10.3762/bjoc.19.126)

### Copies of IR, $^1\text{H}$ and $^{13}\text{C}$ NMR spectra of synthesized compounds and computational details

## Table of contents

|                                                                                                                                                                           |         |
|---------------------------------------------------------------------------------------------------------------------------------------------------------------------------|---------|
| 1. Copies of selected $^1\text{H}$ NMR spectra of crude products<br>obtained by reaction of <b>4</b> or <b>8</b> with $\text{N}_2\text{H}_4\cdot\text{H}_2\text{O}$ ..... | S2–S5   |
| 2. Copies of 1D and 2D NMR spectra of macrocycle <b>5</b> .....                                                                                                           | S6–S9   |
| 3. Copies of 1D and 2D NMR spectra of pyrazolopyrimidine <b>8</b> .....                                                                                                   | S10–S14 |
| 4. Copies of 1D and 2D NMR spectra of pyrazolyl-1,2,4-triazole <b>10</b> .....                                                                                            | S15–S19 |
| 5. Copies of $^1\text{H}$ and $^{13}\text{C}$ spectra of<br>pyrazolo[4,3- <i>e</i> ][1,2,4]triazolo[1,5- <i>c</i> ]pyrimidine <b>13</b> .....                             | S20–S21 |
| 6. Copies of 1D and 2D NMR spectra of pyrazolopyrimidine <b>14</b> .....                                                                                                  | S22–S28 |
| 7. Copies of IR spectra of compounds <b>5</b> , <b>8</b> , <b>10</b> , <b>13</b> , and <b>14</b> .....                                                                    | S29–S33 |
| 8. Computational details .....                                                                                                                                            | S34–S74 |
| 9. References .....                                                                                                                                                       | S75     |

$^1\text{H}$  NMR spectrum of the crude product prepared by the reaction of imidate **4** with 4.14 equiv of  $\text{N}_2\text{H}_4\cdot\text{H}_2\text{O}$  (EtOH, reflux, 2 h)  
(600.13 MHz,  $\text{DMSO-}d_6$ )

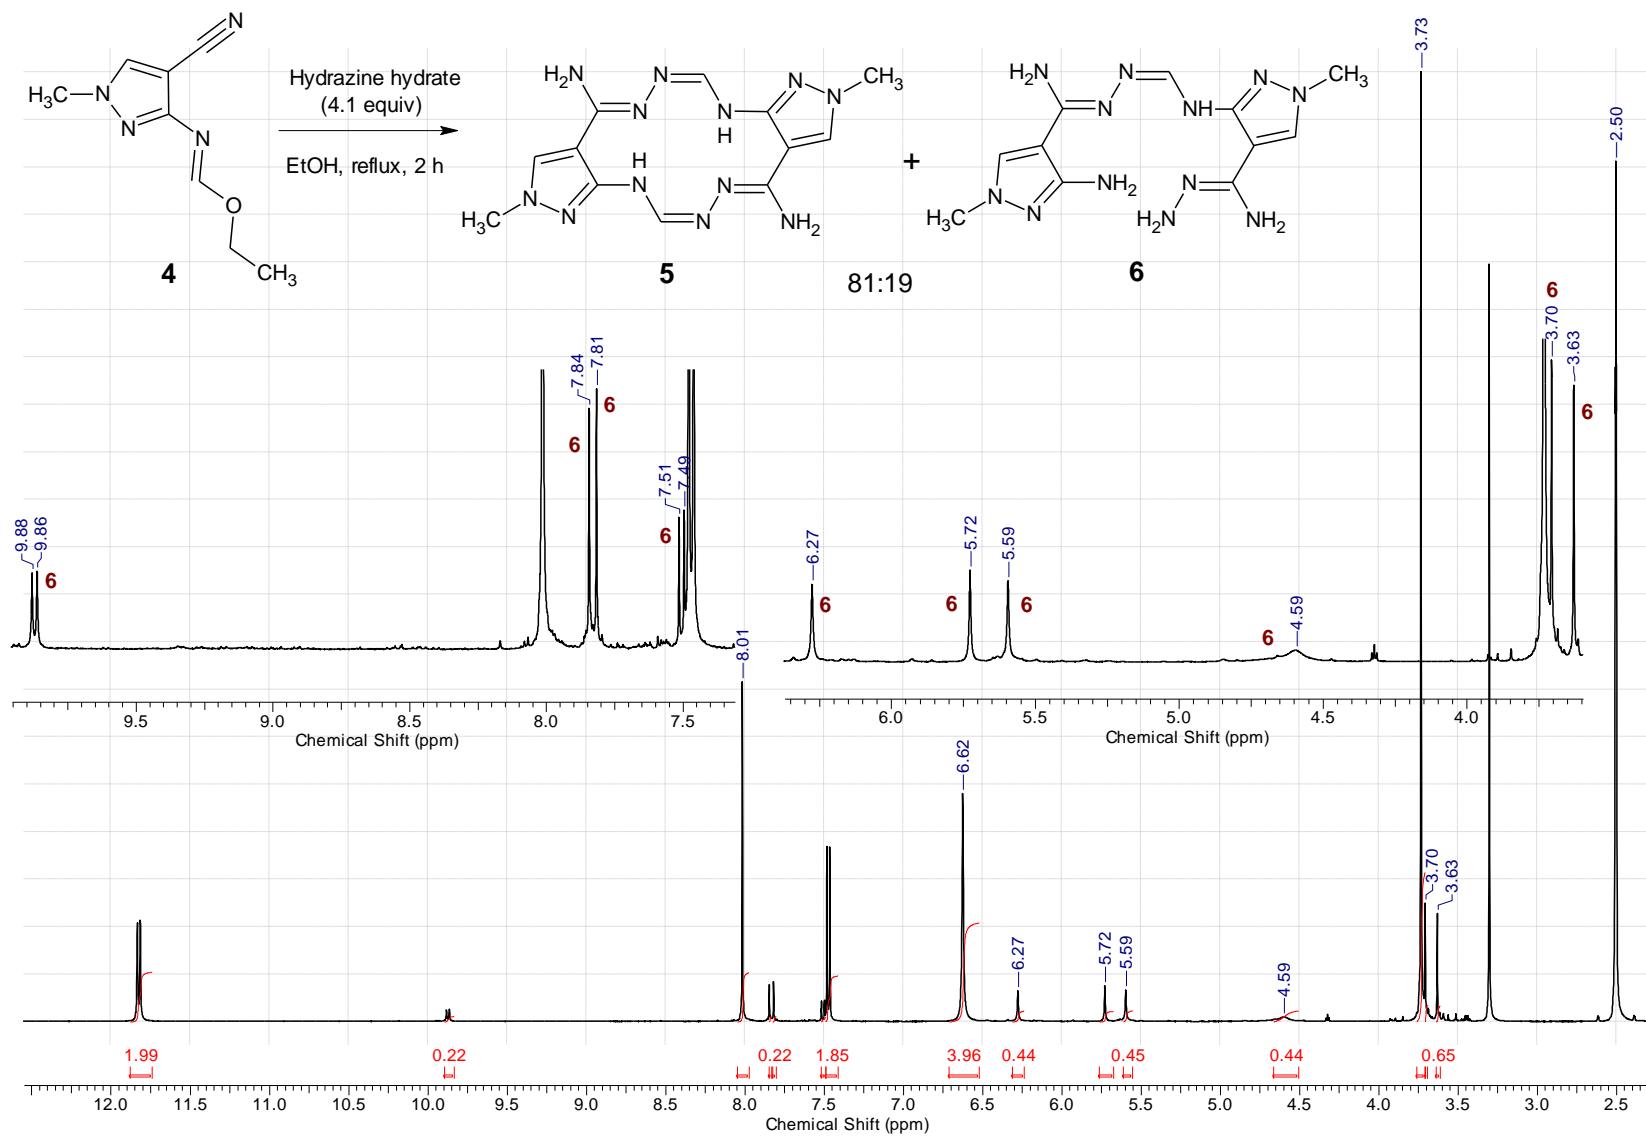

$^1\text{H}$  NMR spectrum of the crude product prepared by the reaction of **8** with 1.51 equiv of  $\text{N}_2\text{H}_4\cdot\text{H}_2\text{O}$  (MeOH, reflux, 3 h)  
(600.13 MHz,  $\text{DMSO-}d_6$ )

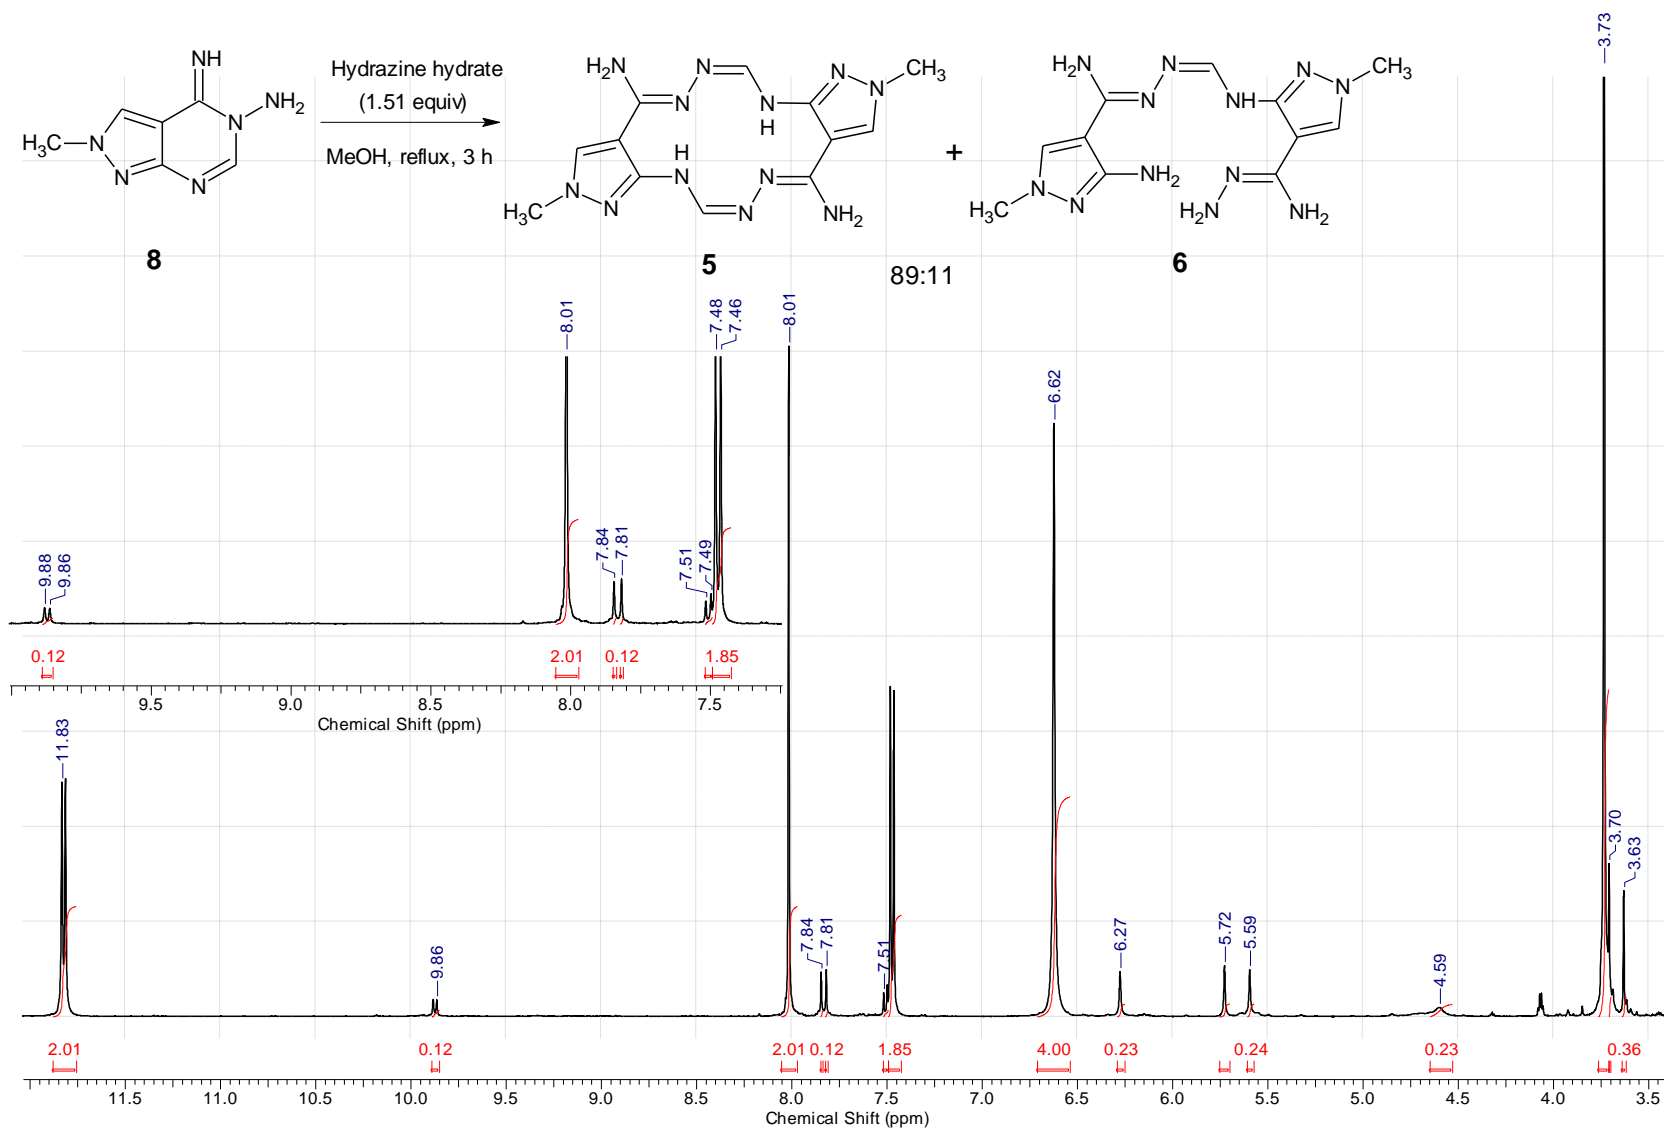

$^1\text{H}$  NMR spectrum of the crude product prepared by the reaction of **8** with 6.29 equiv of  $\text{N}_2\text{H}_4\cdot\text{H}_2\text{O}$  (EtOH, reflux, 0.5 h)  
(600.13 MHz,  $\text{DMSO-}d_6$ )

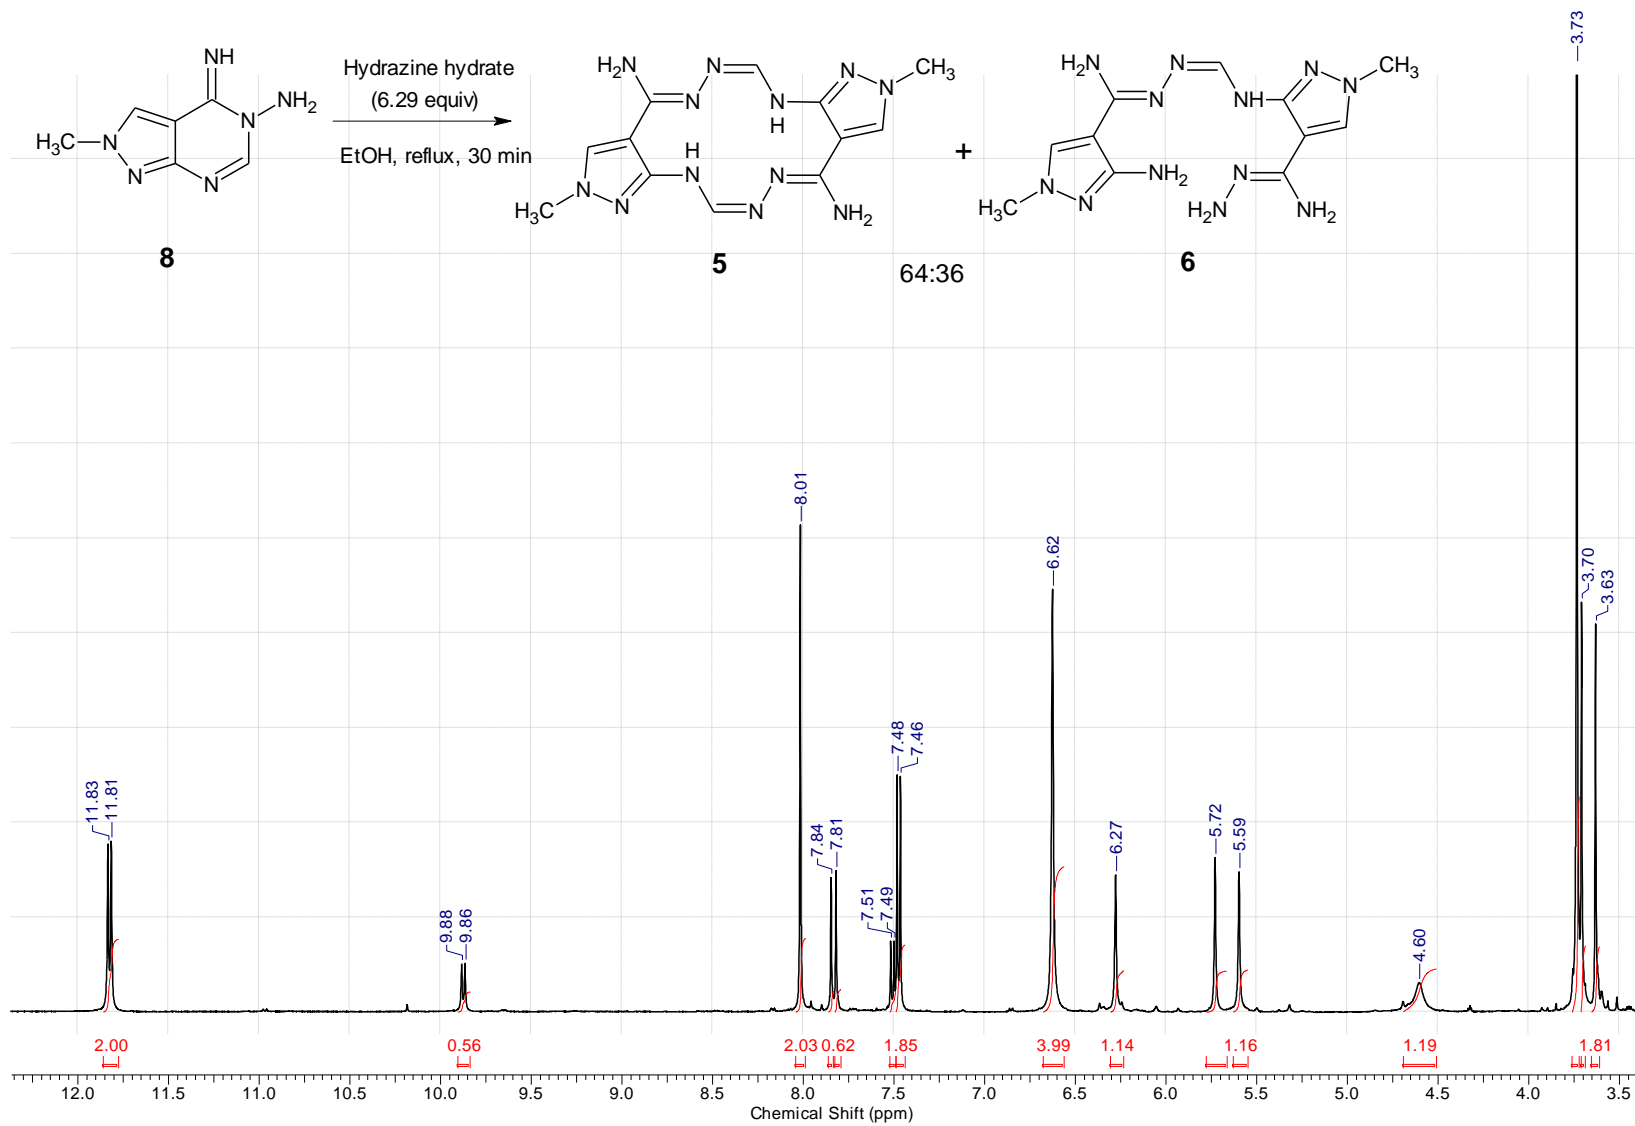

$^1\text{H}$  NMR spectrum of the crude product prepared by the reaction of **8** with  $\text{N}_2\text{H}_4\cdot\text{H}_2\text{O}$  (2.93 equiv) and  $\text{TsOH}\cdot\text{H}_2\text{O}$  (0.05 equiv) (dioxane, reflux, 1 h)  
(600.13 MHz,  $\text{DMSO}-d_6$ )

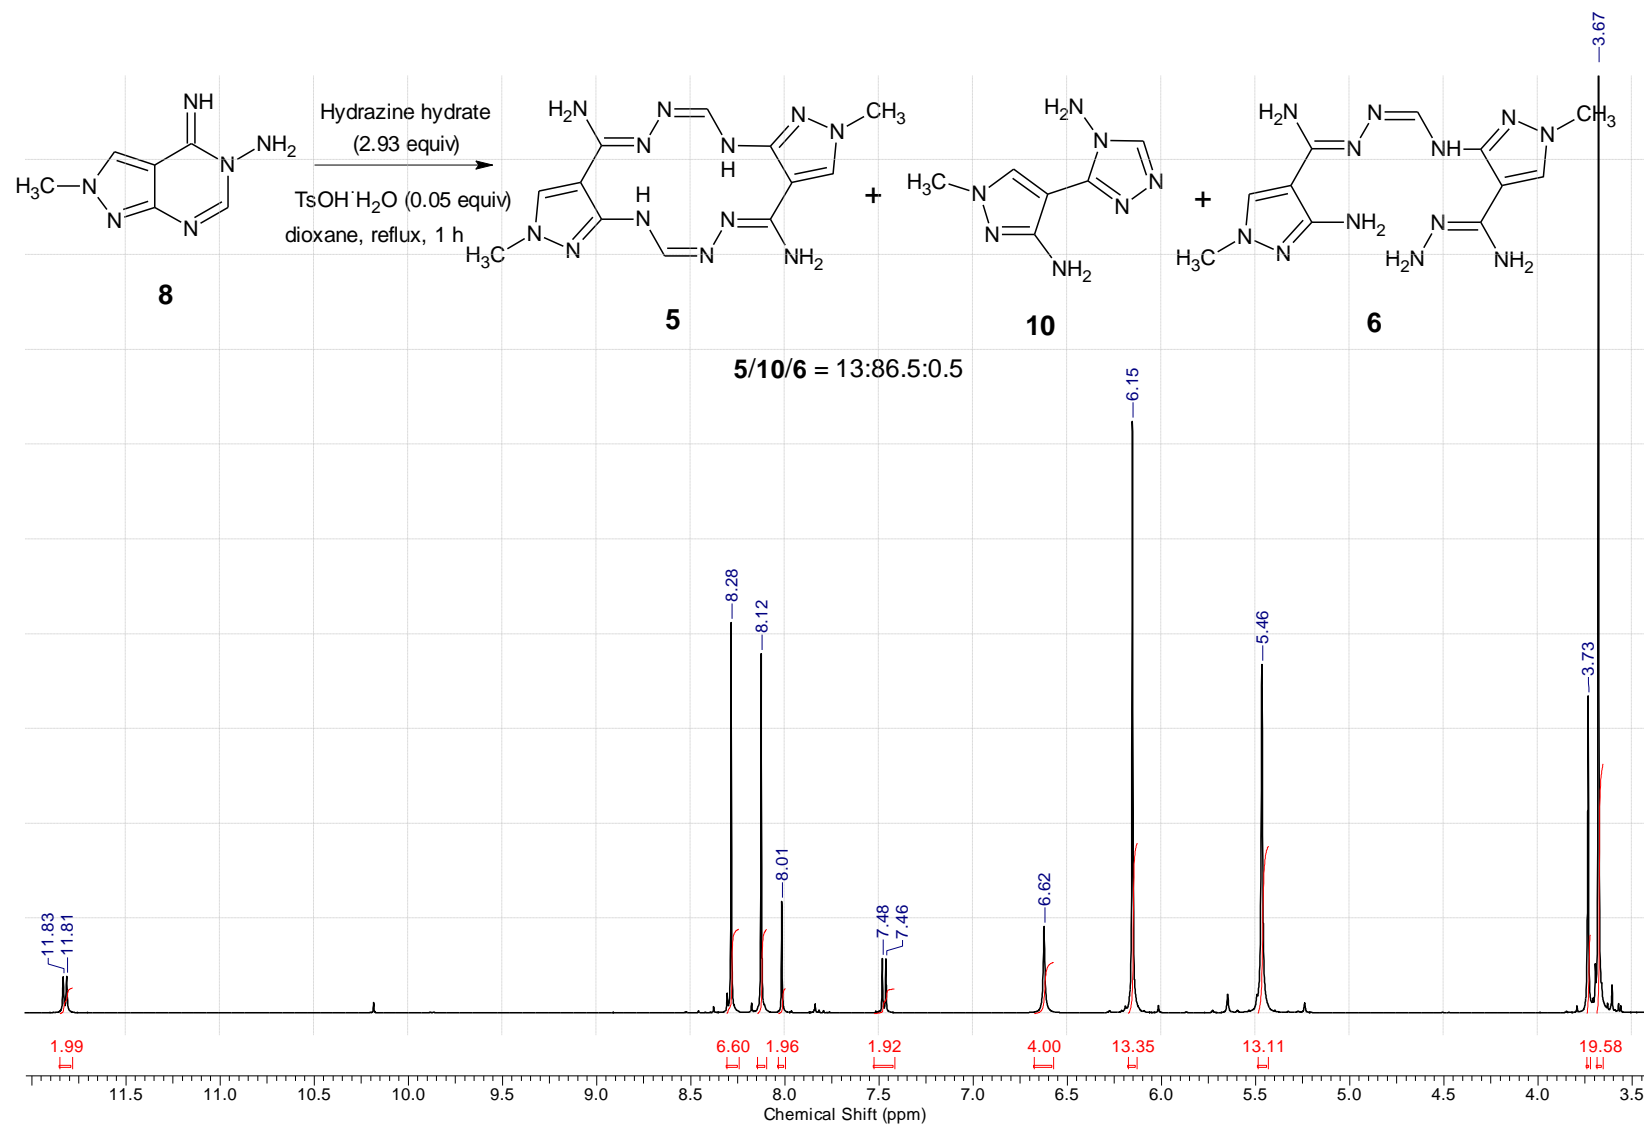

<sup>1</sup>H NMR spectrum of compound **5** (600.13 MHz, 30 °C, DMSO-*d*<sub>6</sub>).

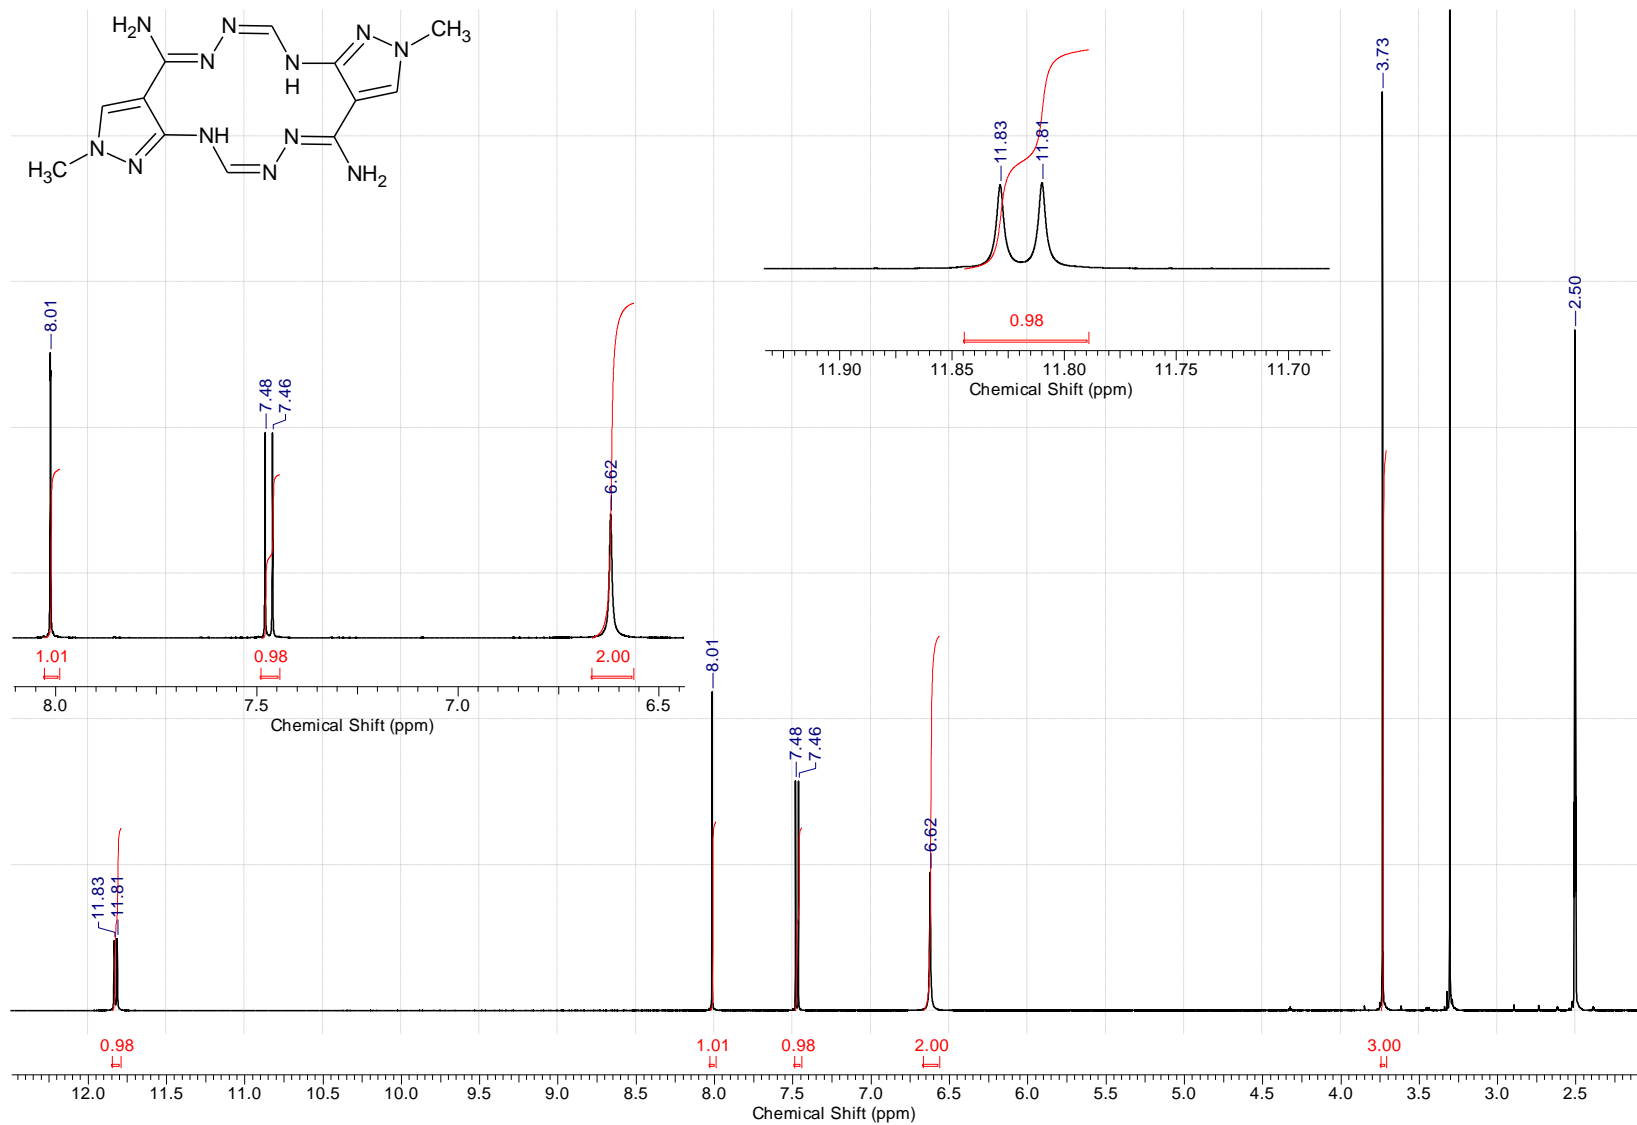

$^{13}\text{C}$  NMR spectrum of compound **5** (150.90 MHz, 30 °C, DMSO- $d_6$ )

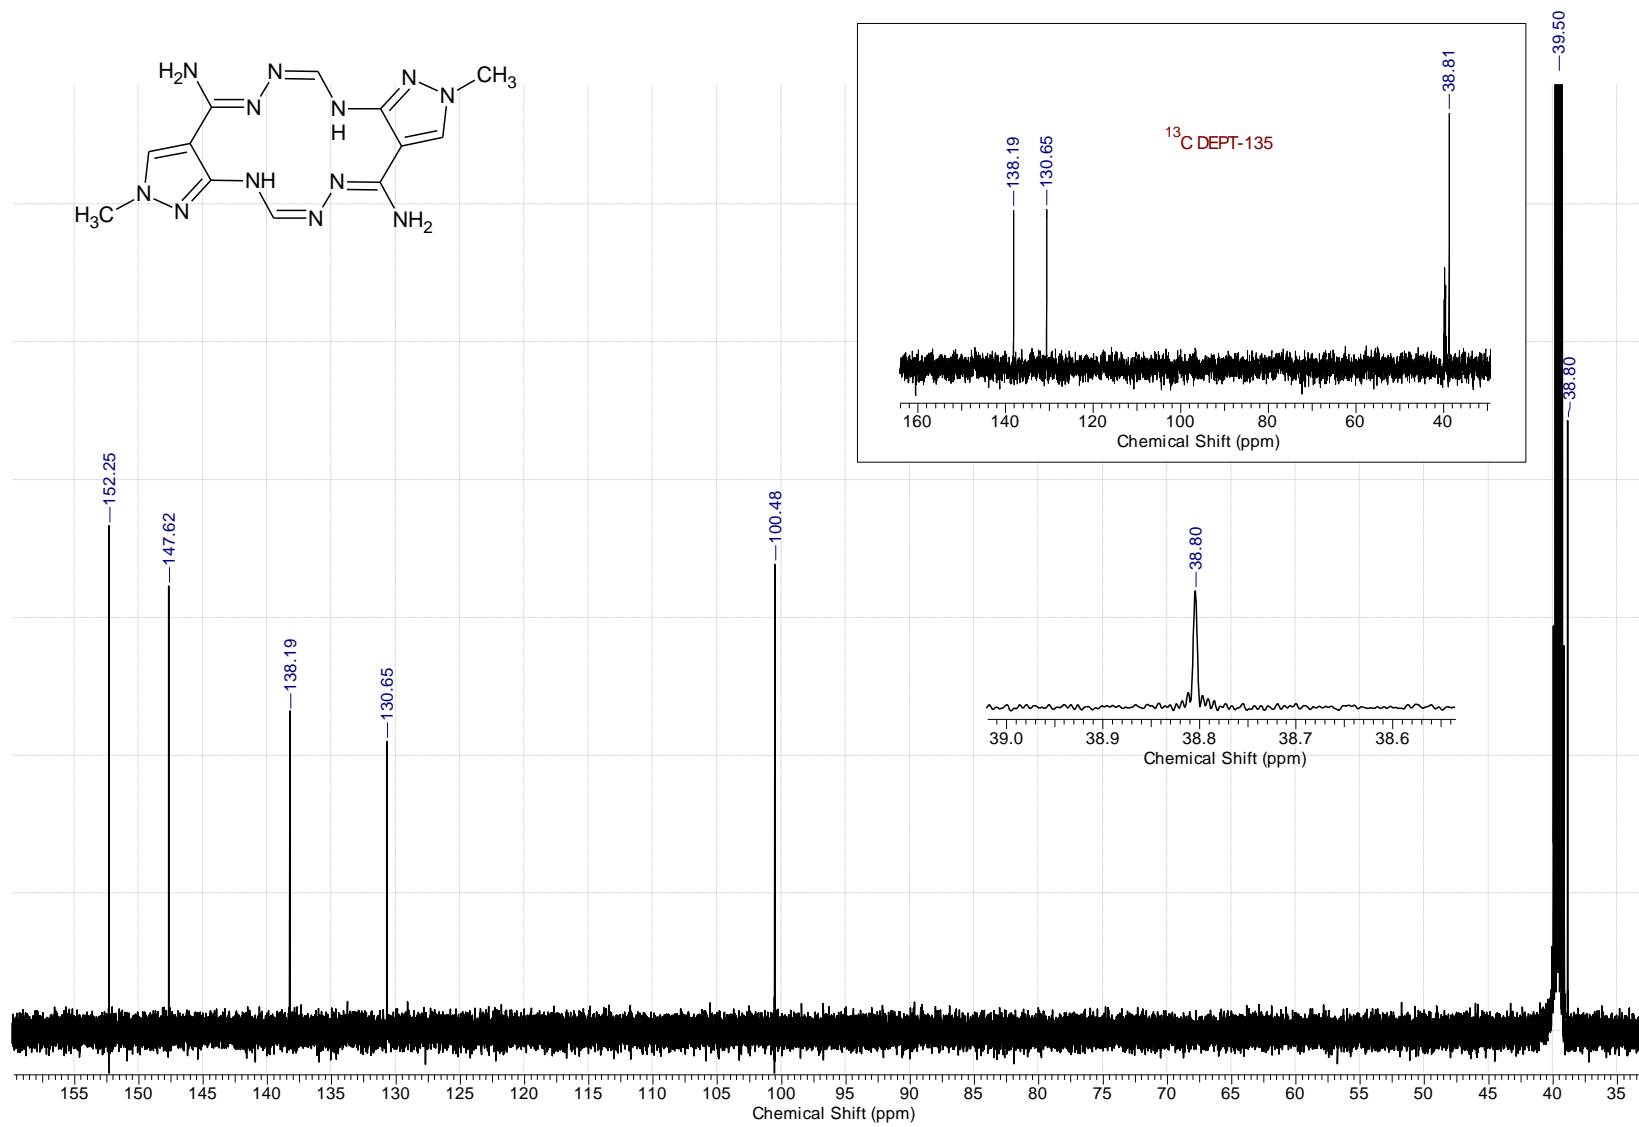



$^1\text{H}$ ,  $^{13}\text{C}$  HSQC spectrum of compound **5** (Bruker Avance III, 30 °C, DMSO- $d_6$ )

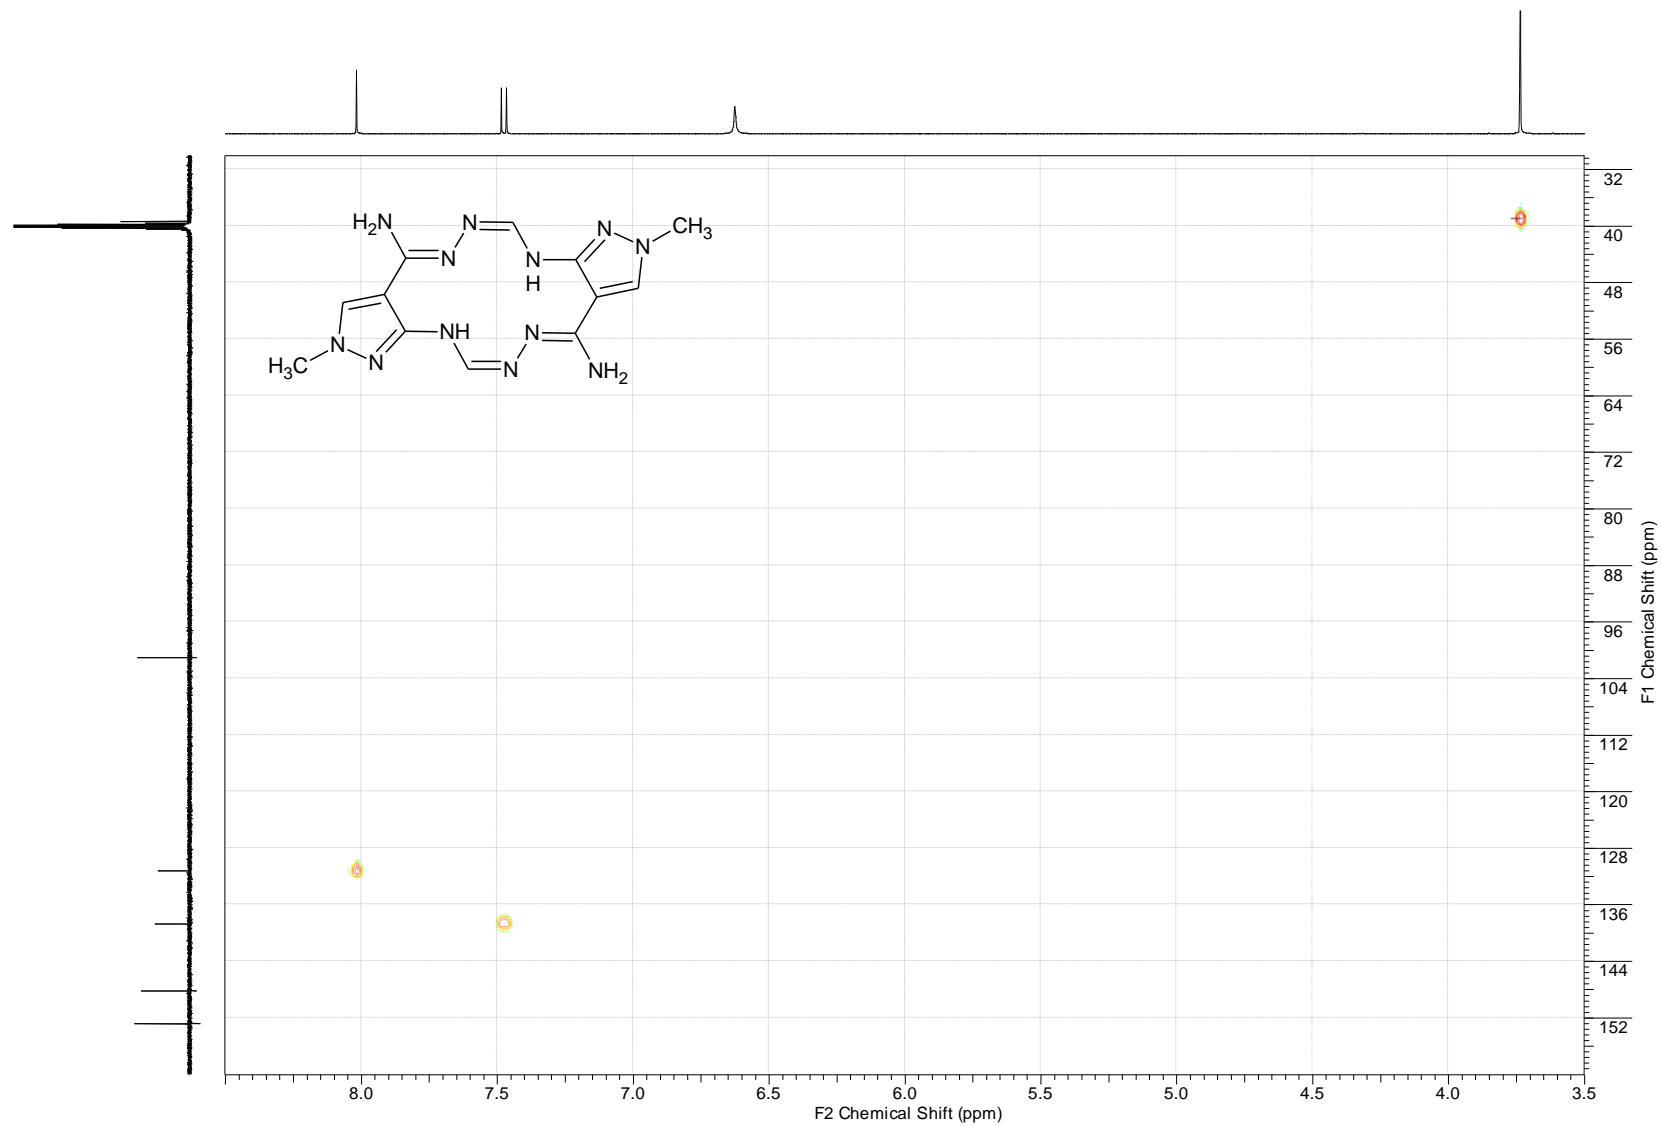

$^1\text{H}, ^{13}\text{C}$  HMBC spectrum of compound **5** (Bruker Avance III, 30 °C,  $\text{DMSO-}d_6$ )

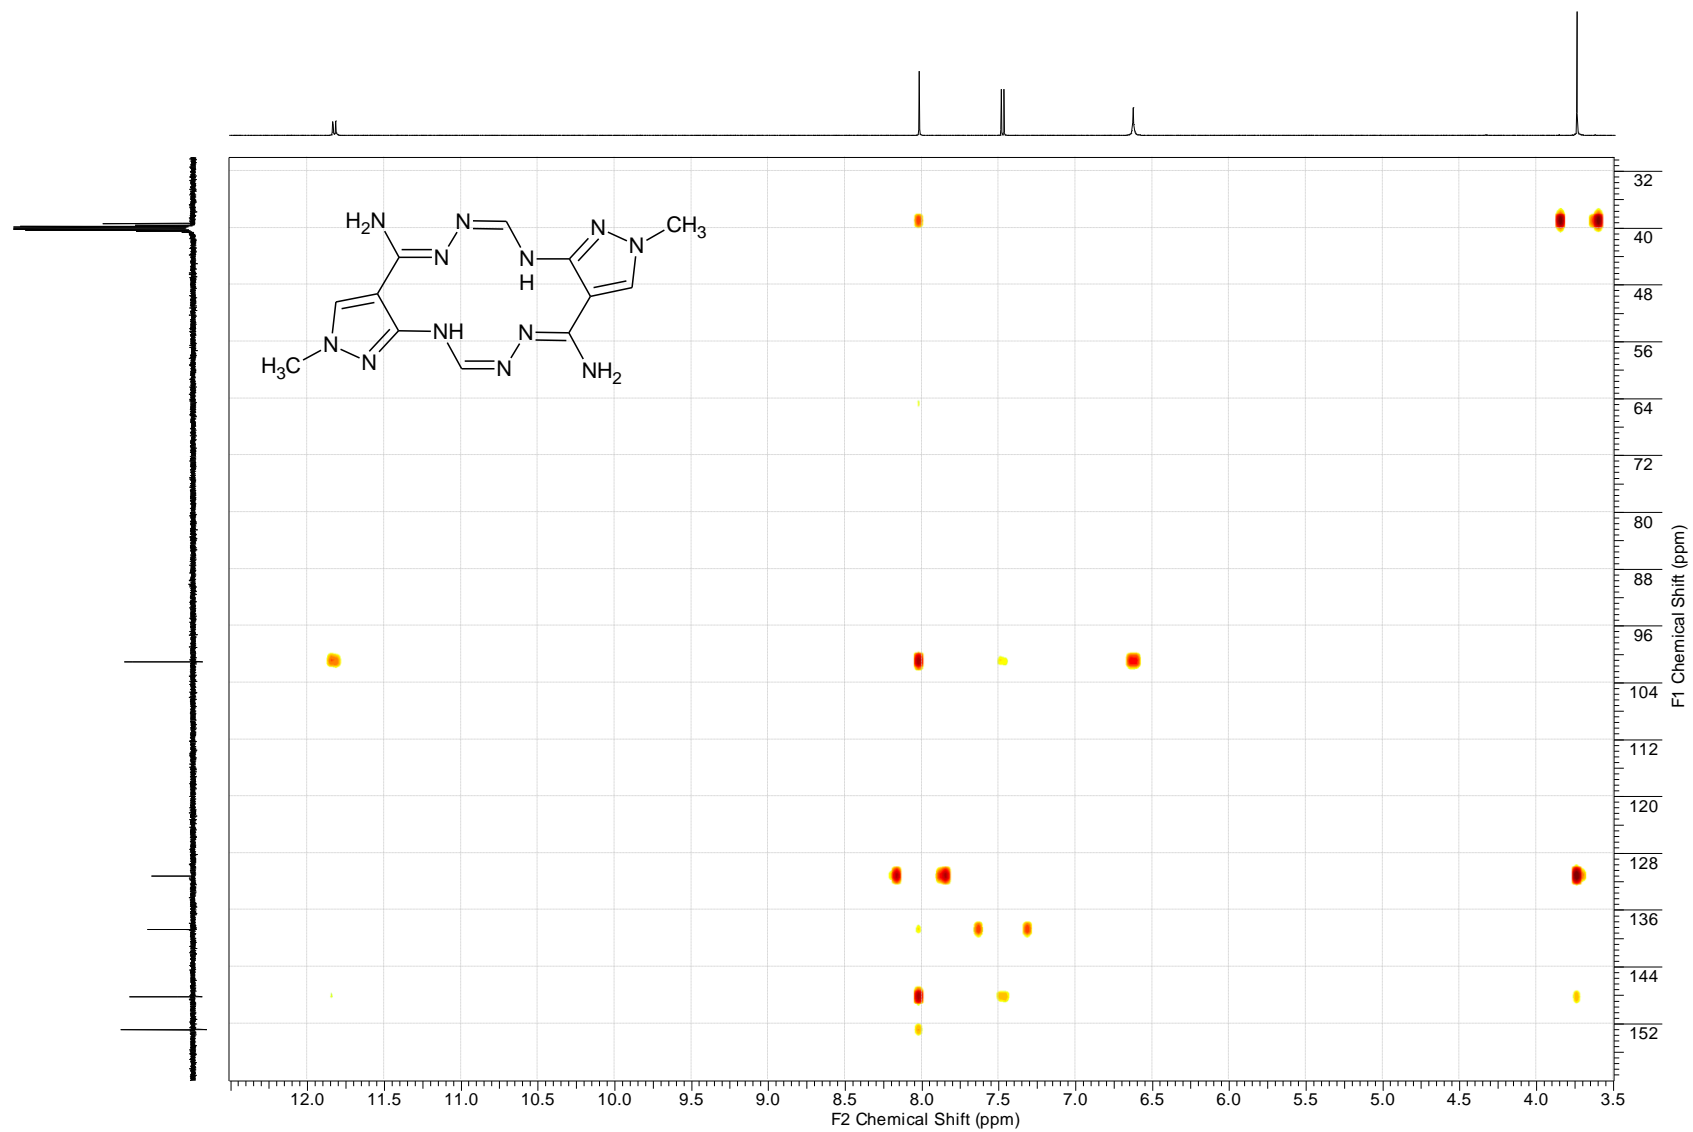

$^1\text{H}$  NMR spectrum of compound **8** (600.13 MHz, 30 °C, DMSO- $d_6$ ).

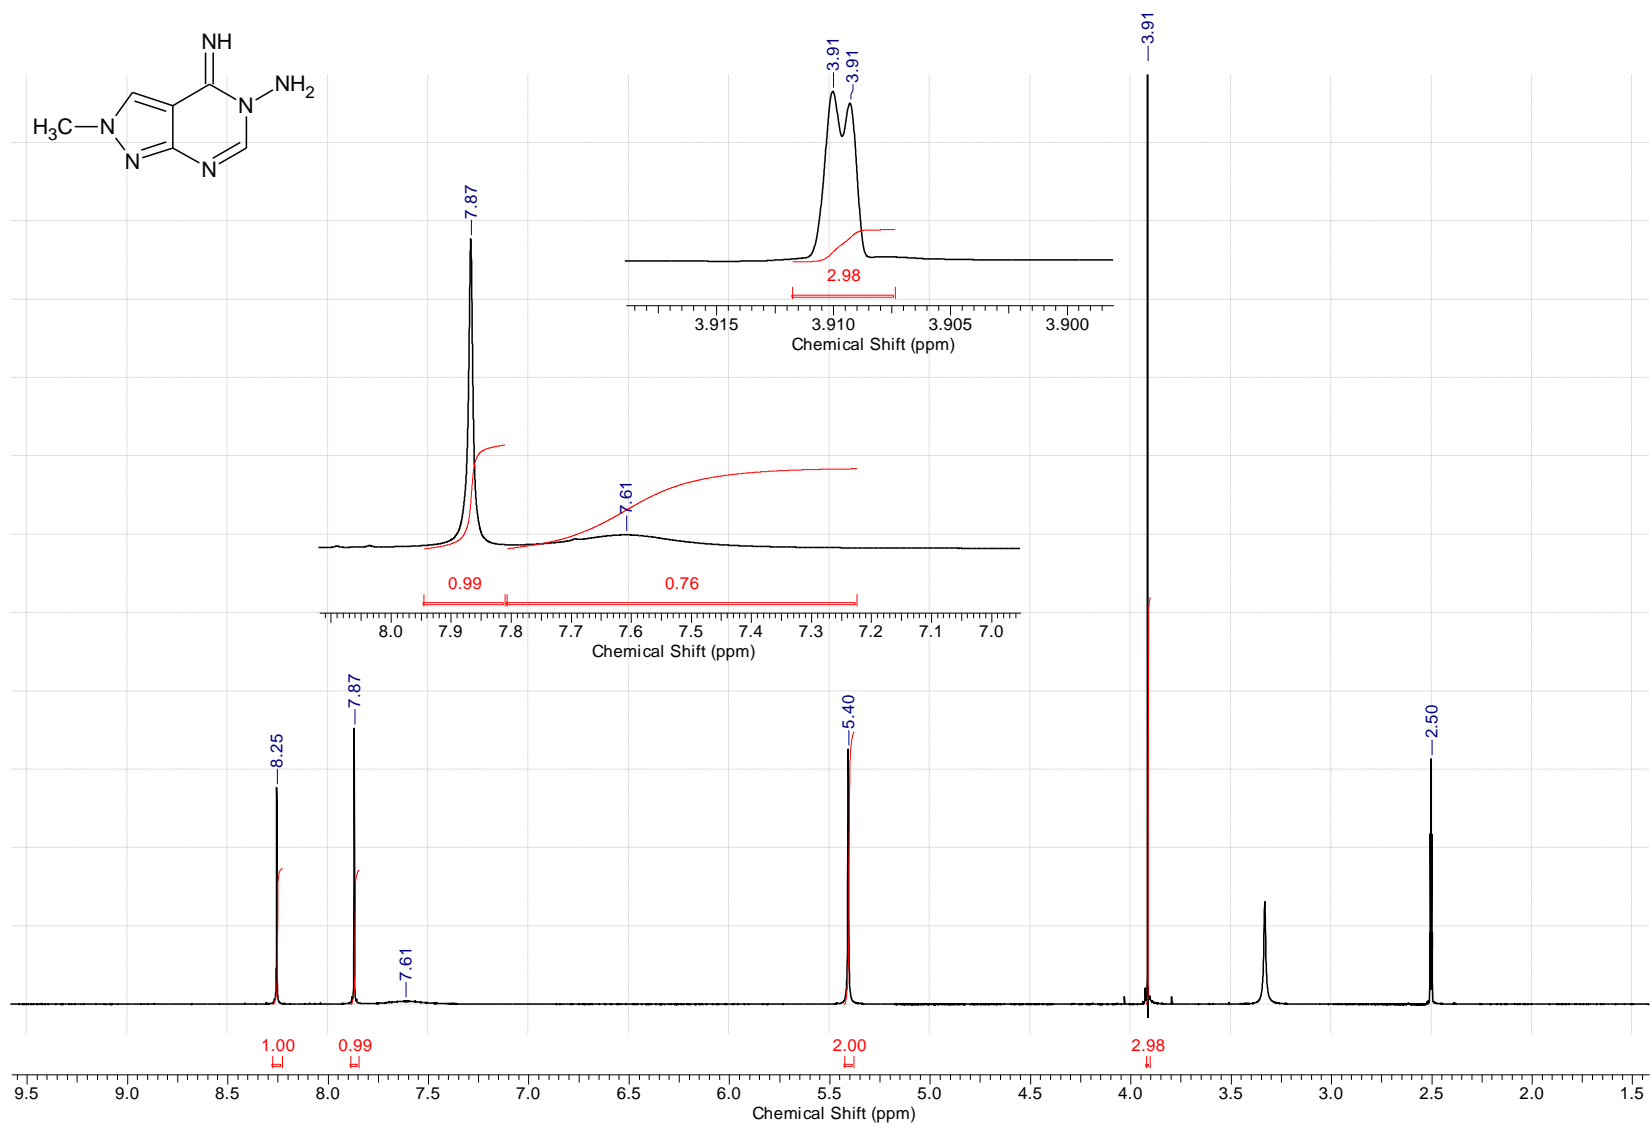

$^{13}\text{C}$  NMR spectrum of compound **8** (150.90 MHz, 30 °C, DMSO- $d_6$ )

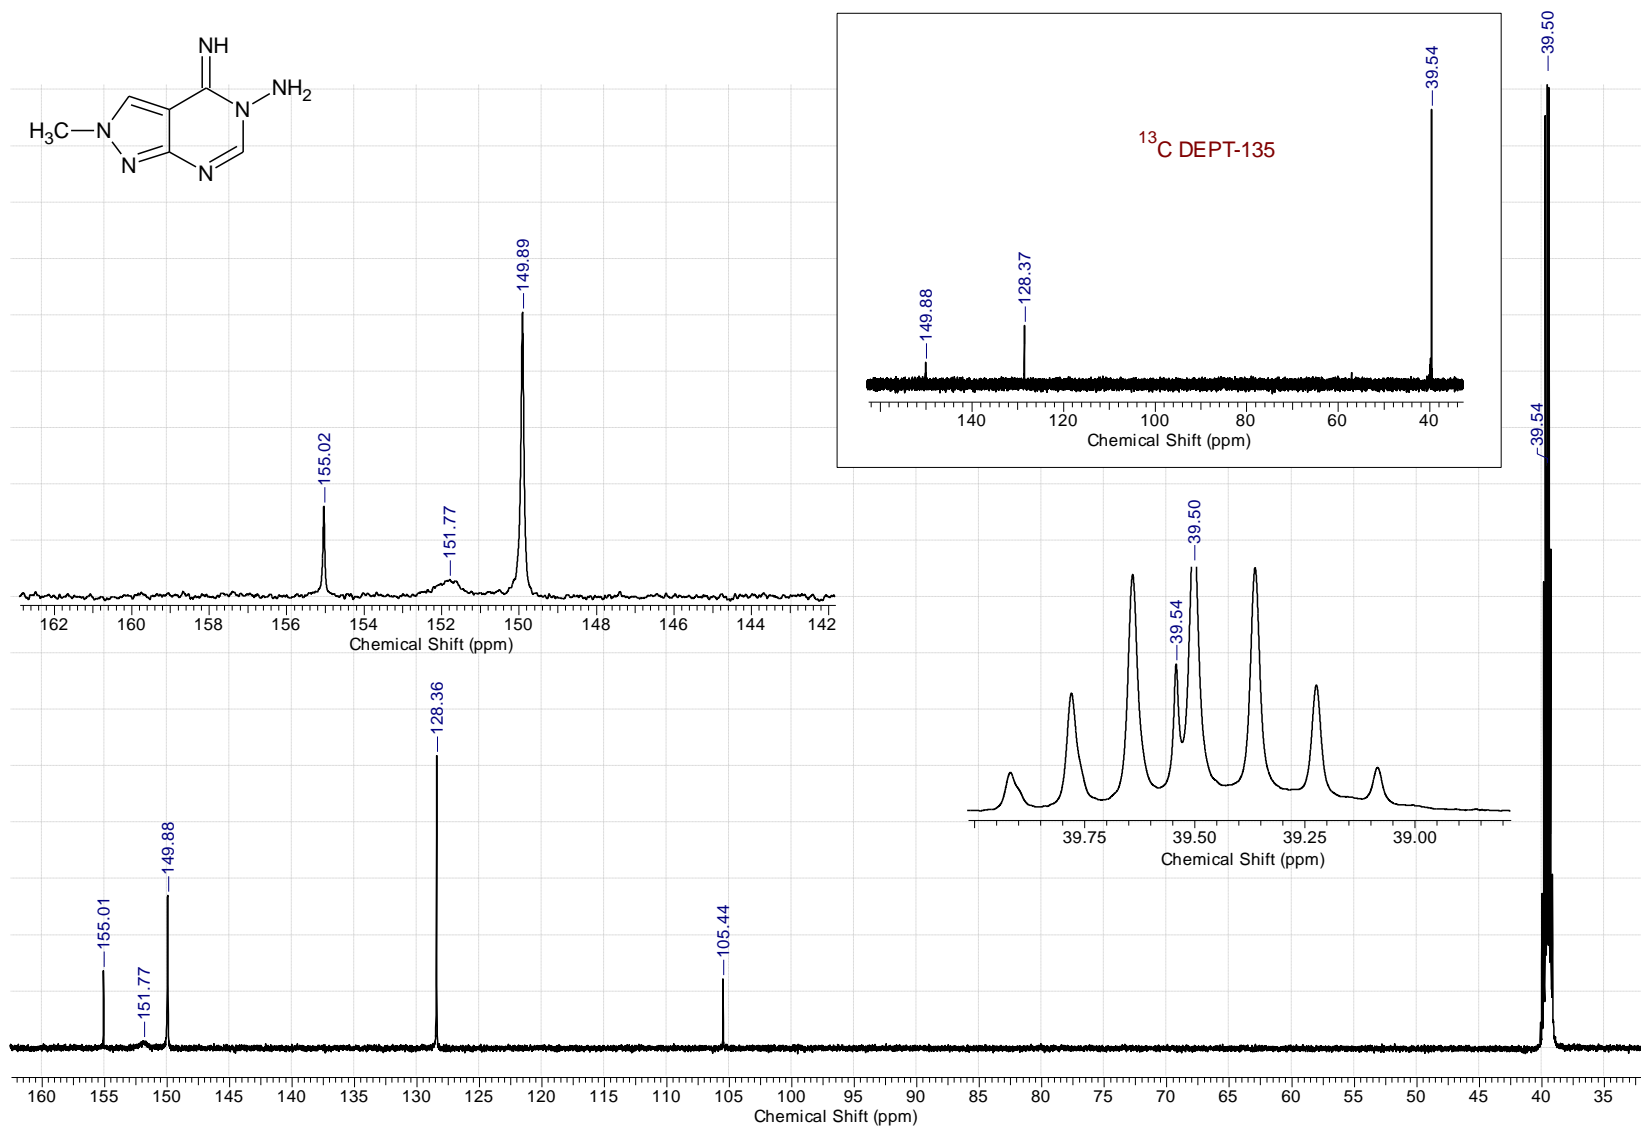

$^1\text{H}$ ,  $^{13}\text{C}$  HSQC spectrum of compound **8** (Bruker Avance III, 30 °C, DMSO- $d_6$ )

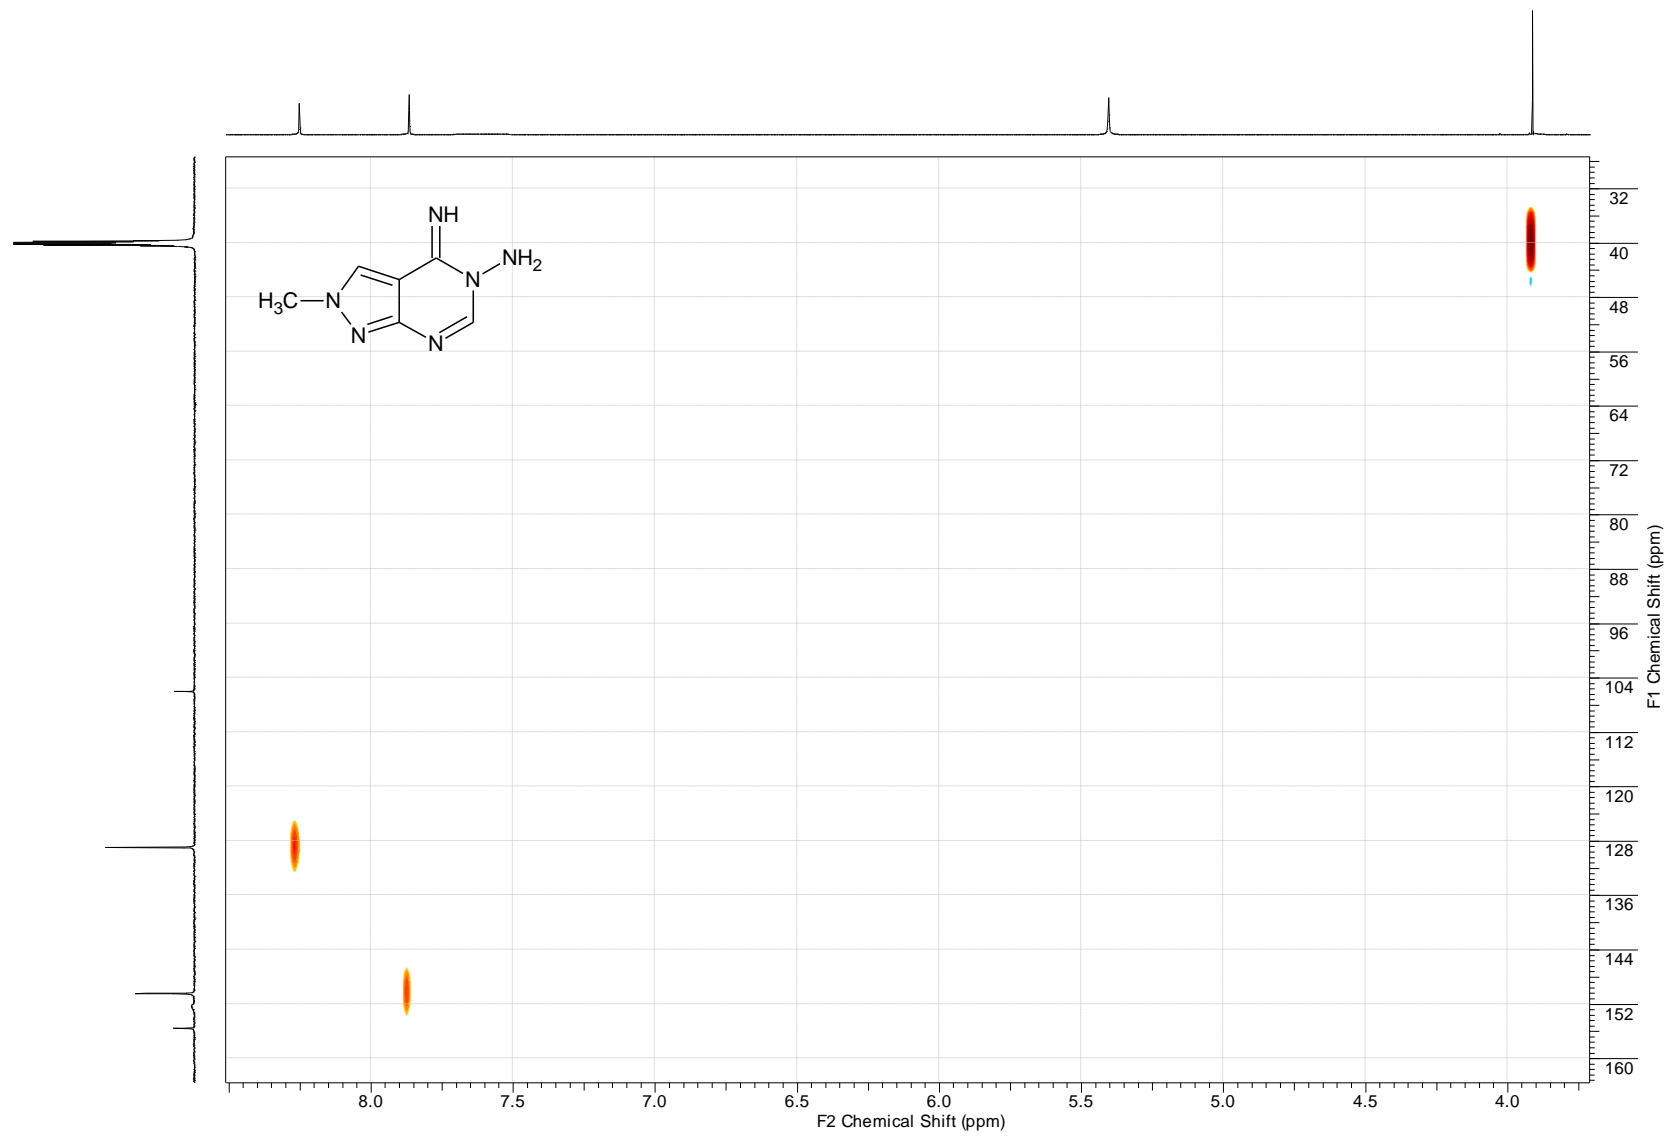

$^1\text{H}, ^{13}\text{C}$  HMBC spectrum of compound **8** (Bruker Avance III, 30 °C,  $\text{DMSO-}d_6$ )

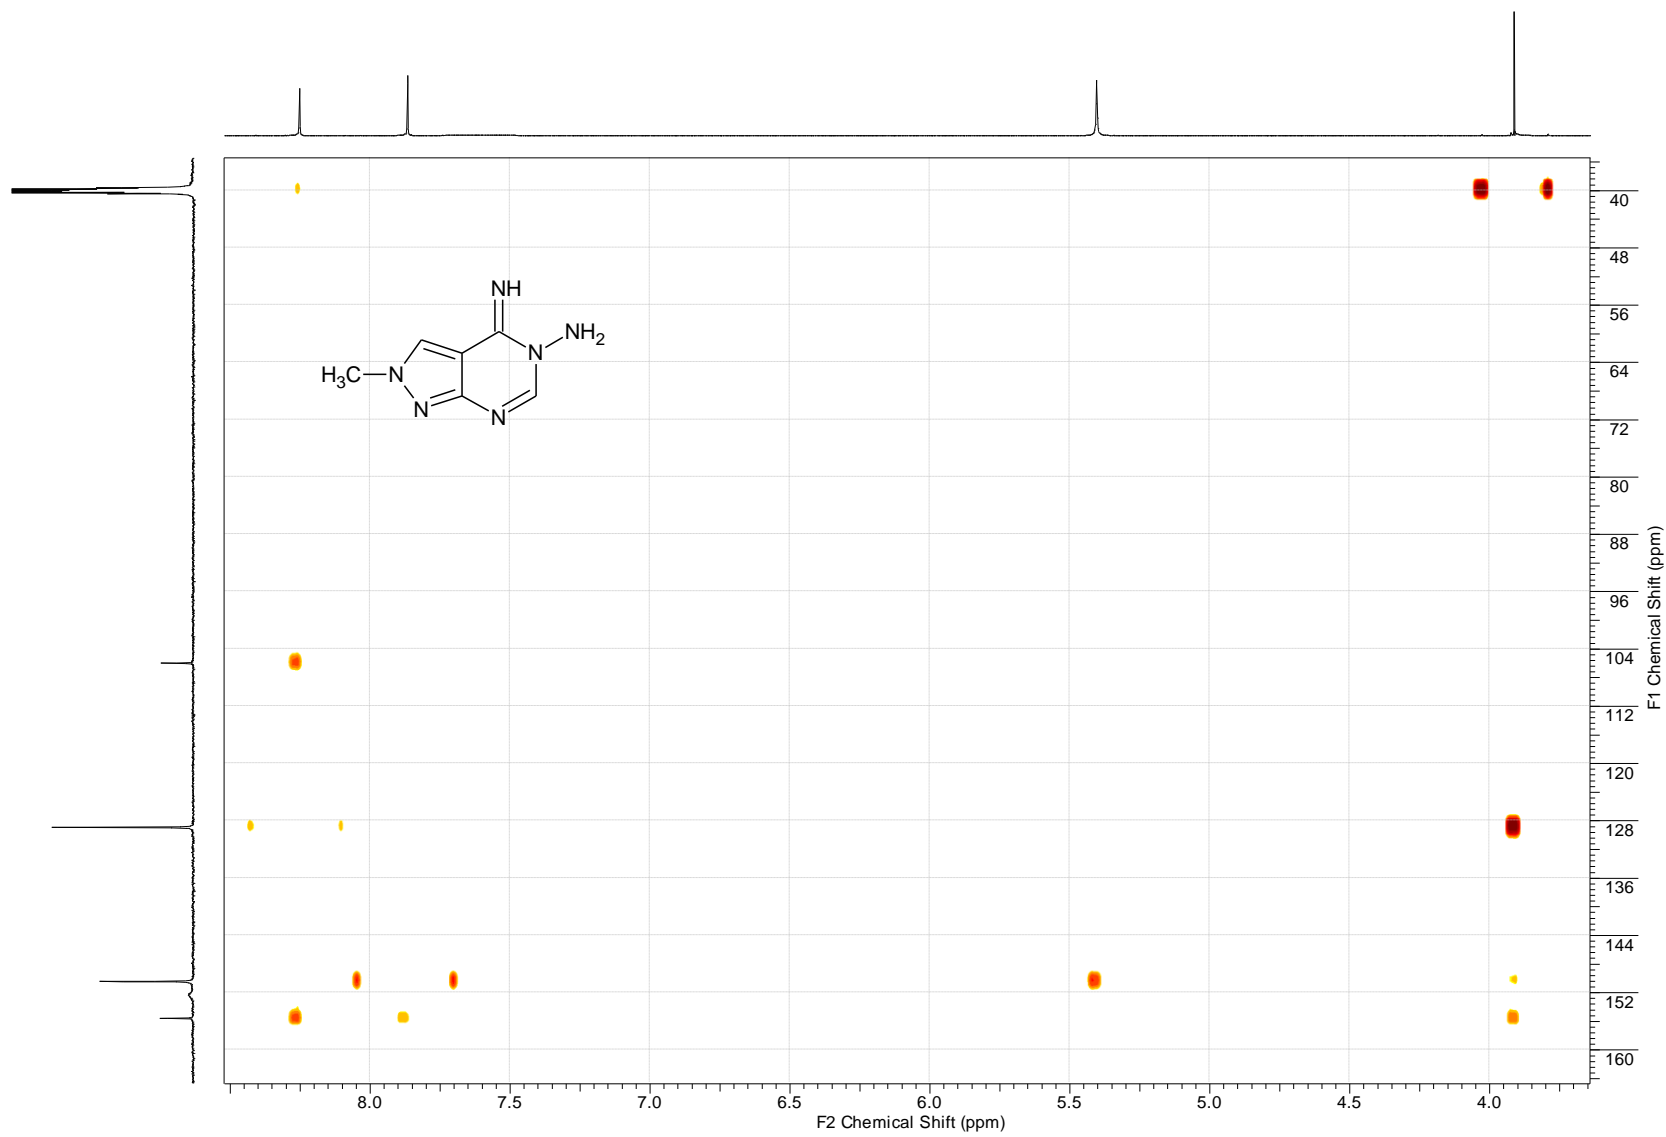

$^1\text{H}, ^1\text{H}$  NOESY spectrum of compound **8** (600.13 MHz, 30 °C, DMSO- $d_6$ )

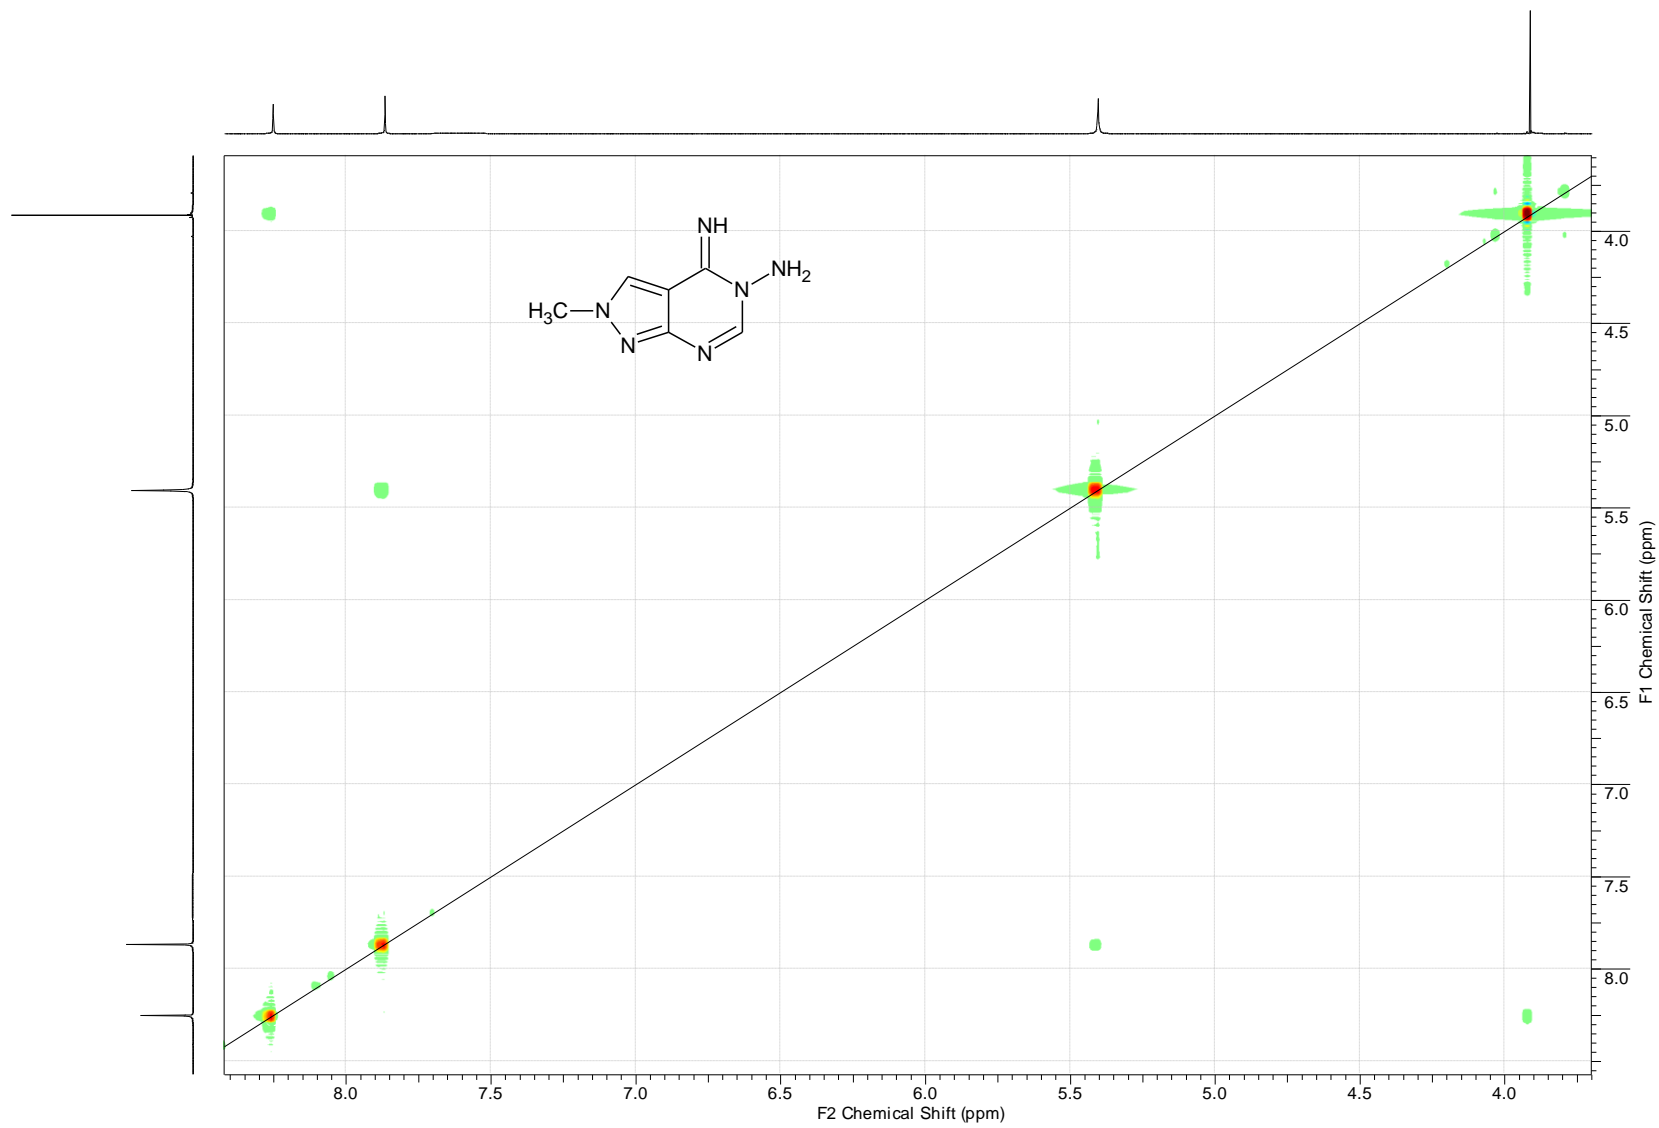

$^1\text{H}$  NMR spectrum of compound **10** (600.13 MHz, 30 °C, DMSO- $d_6$ ).

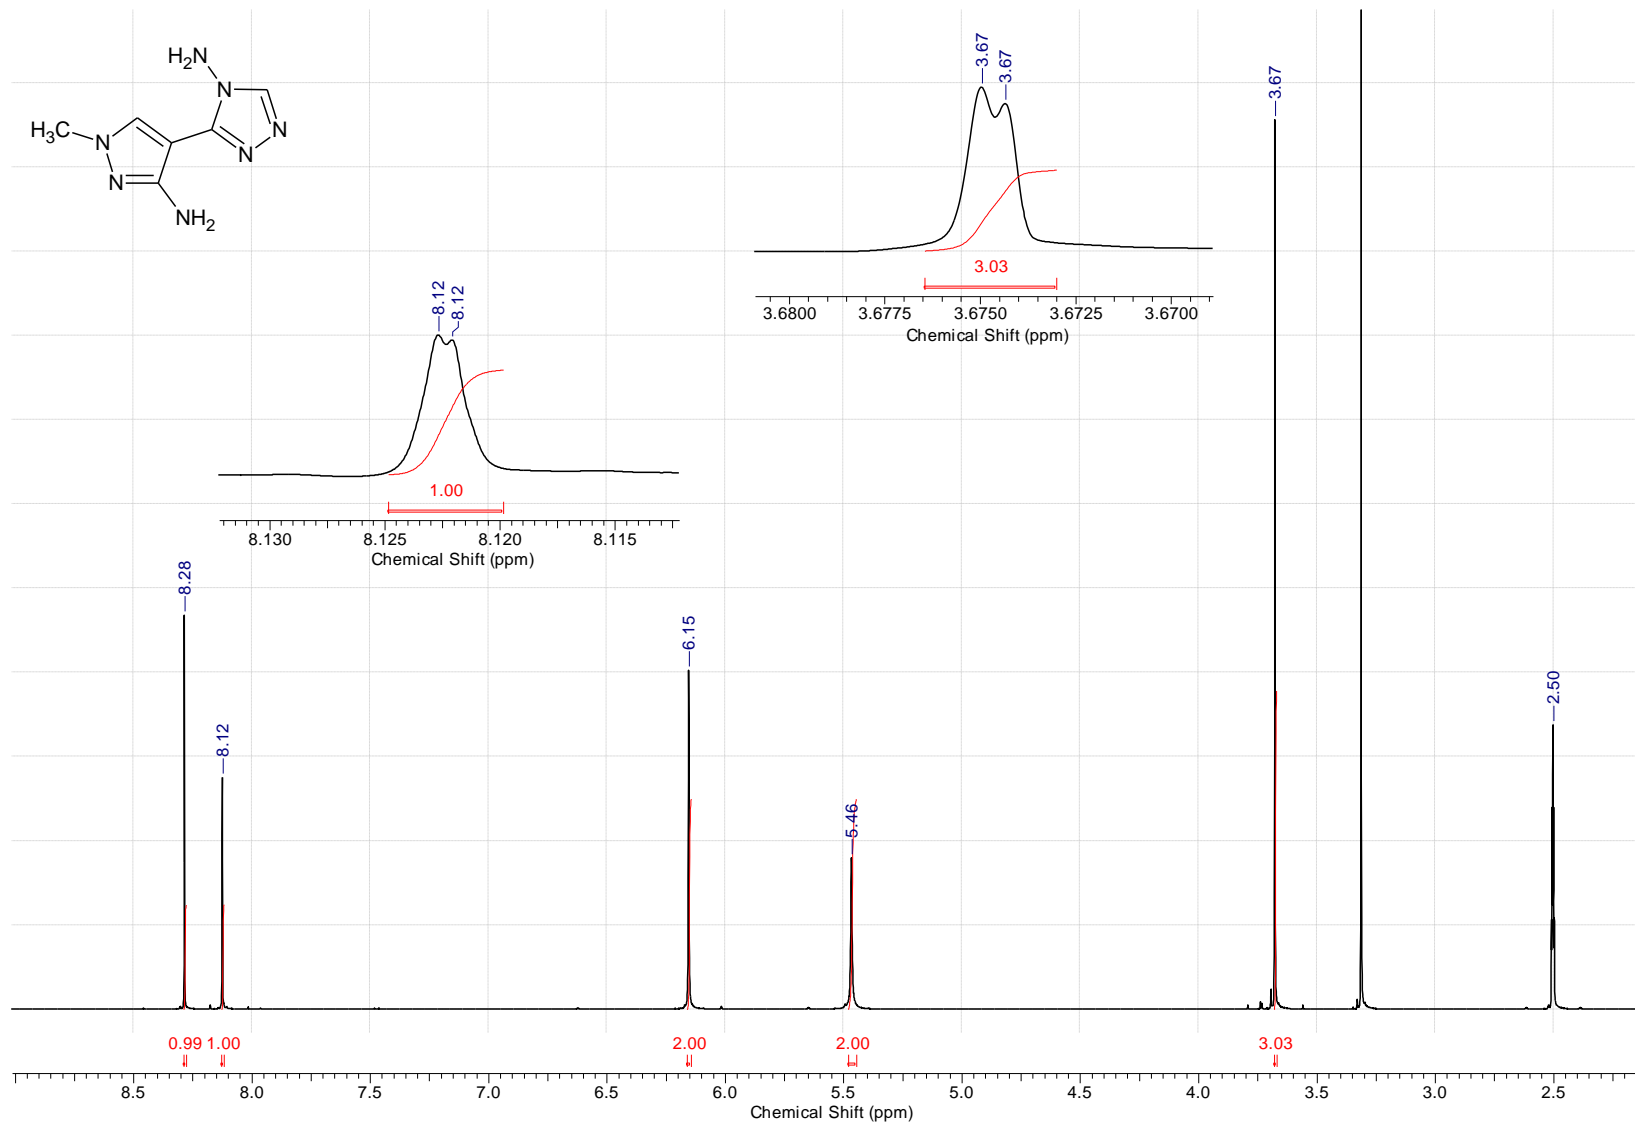



$^{13}\text{C}$  NMR spectrum of compound **10** (150.90 MHz, 30 °C,  $\text{DMSO-}d_6$ )

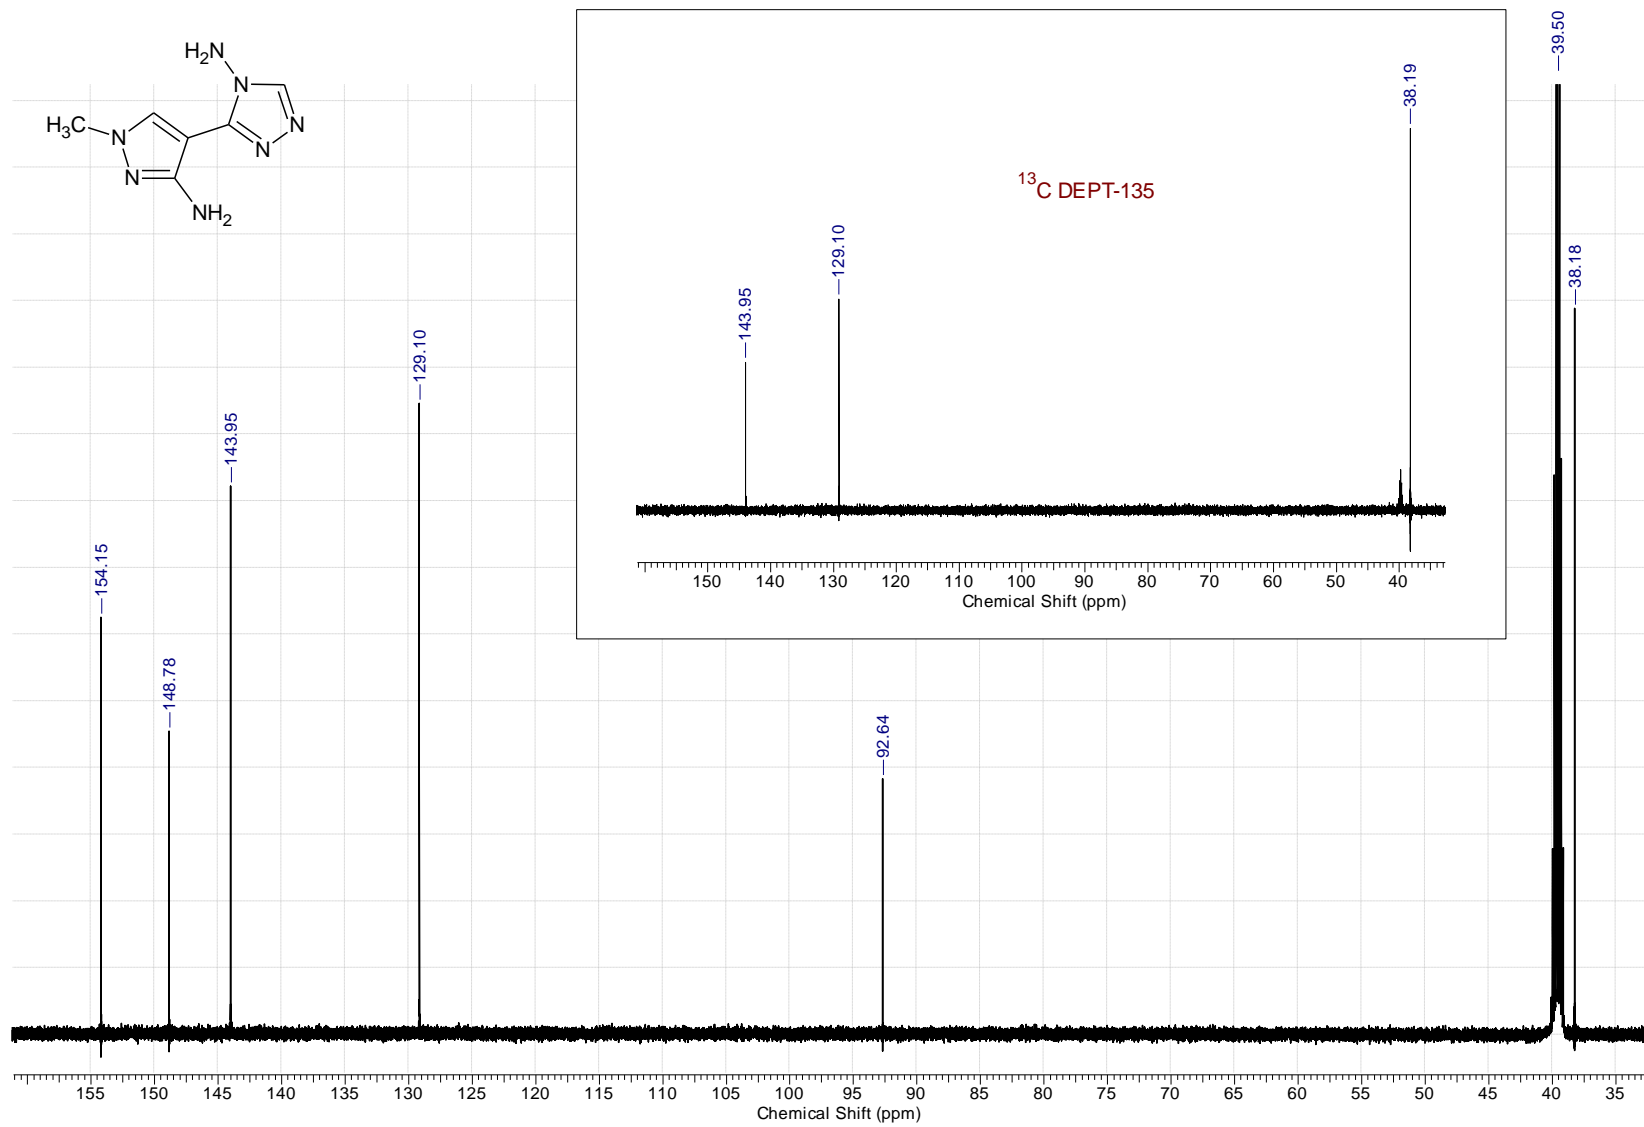

$^1\text{H}, ^{13}\text{C}$  HSQC spectrum of compound **10** (Bruker Avance III, 30 °C,  $\text{DMSO-}d_6$ )

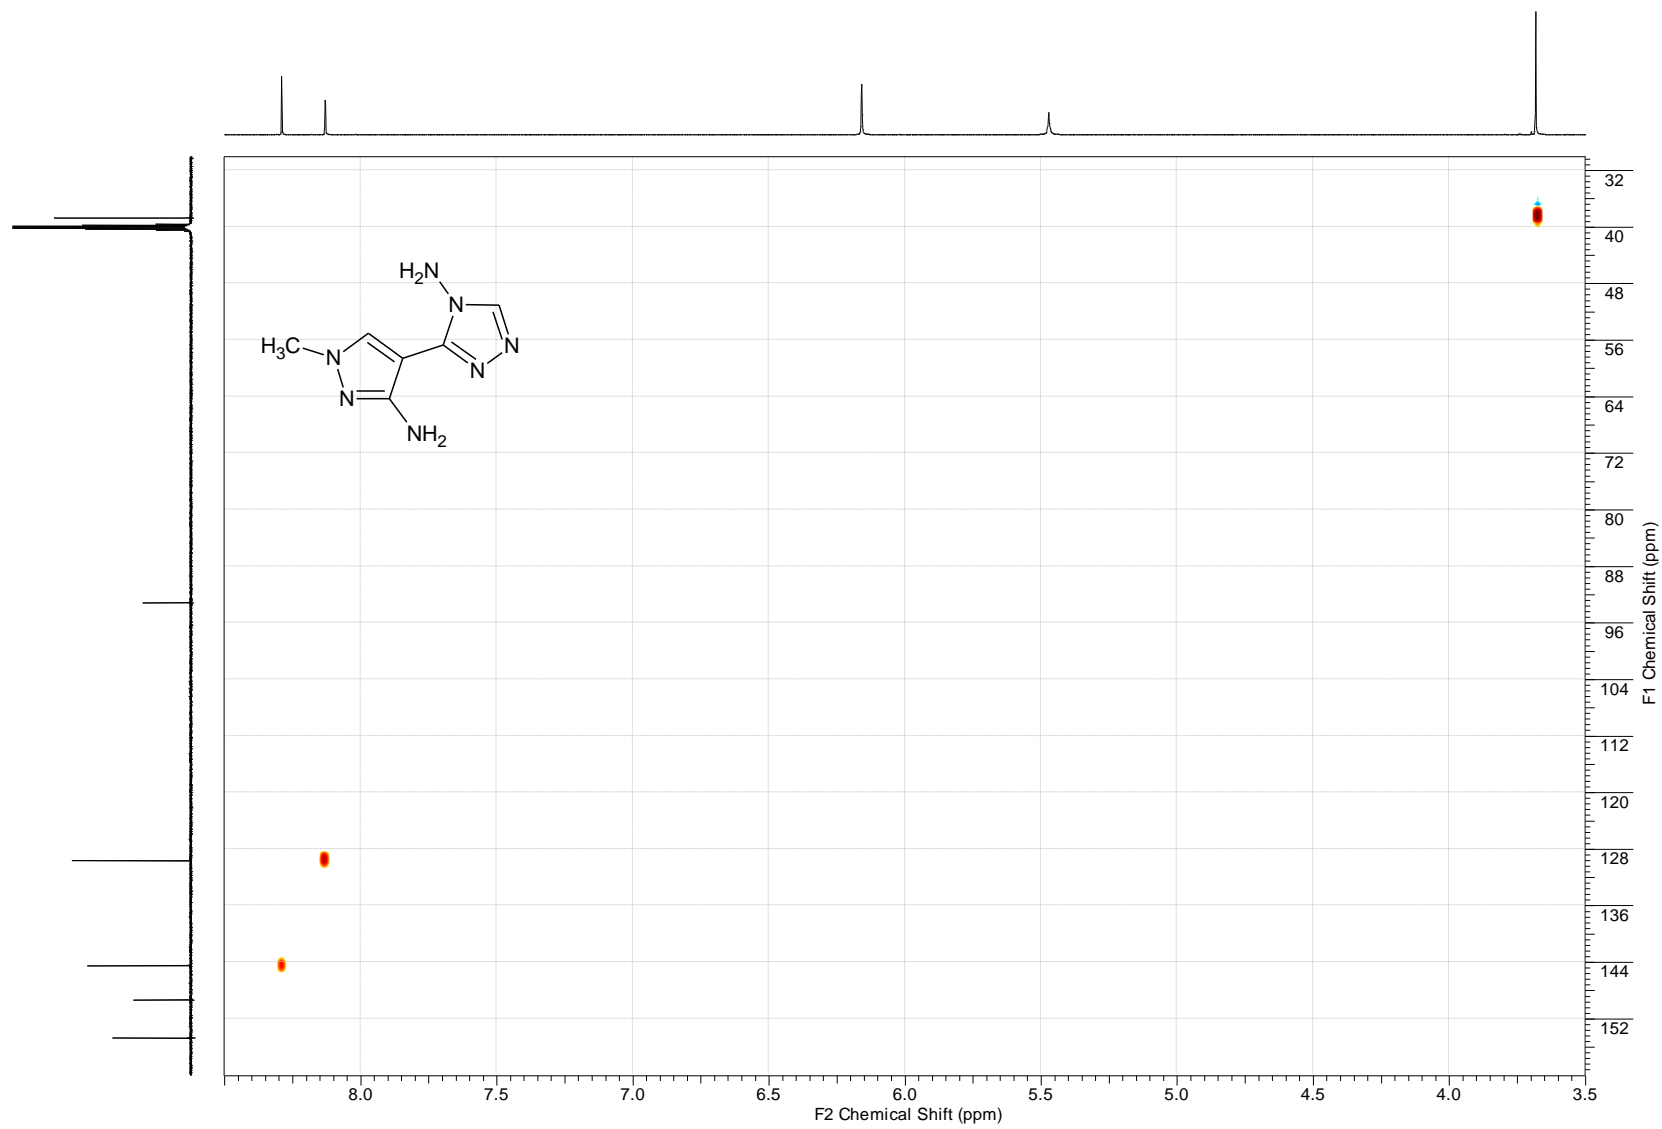

$^1\text{H}$ ,  $^{13}\text{C}$  HMBC spectrum of compound **10** (Bruker Avance III, 30 °C, DMSO- $d_6$ )

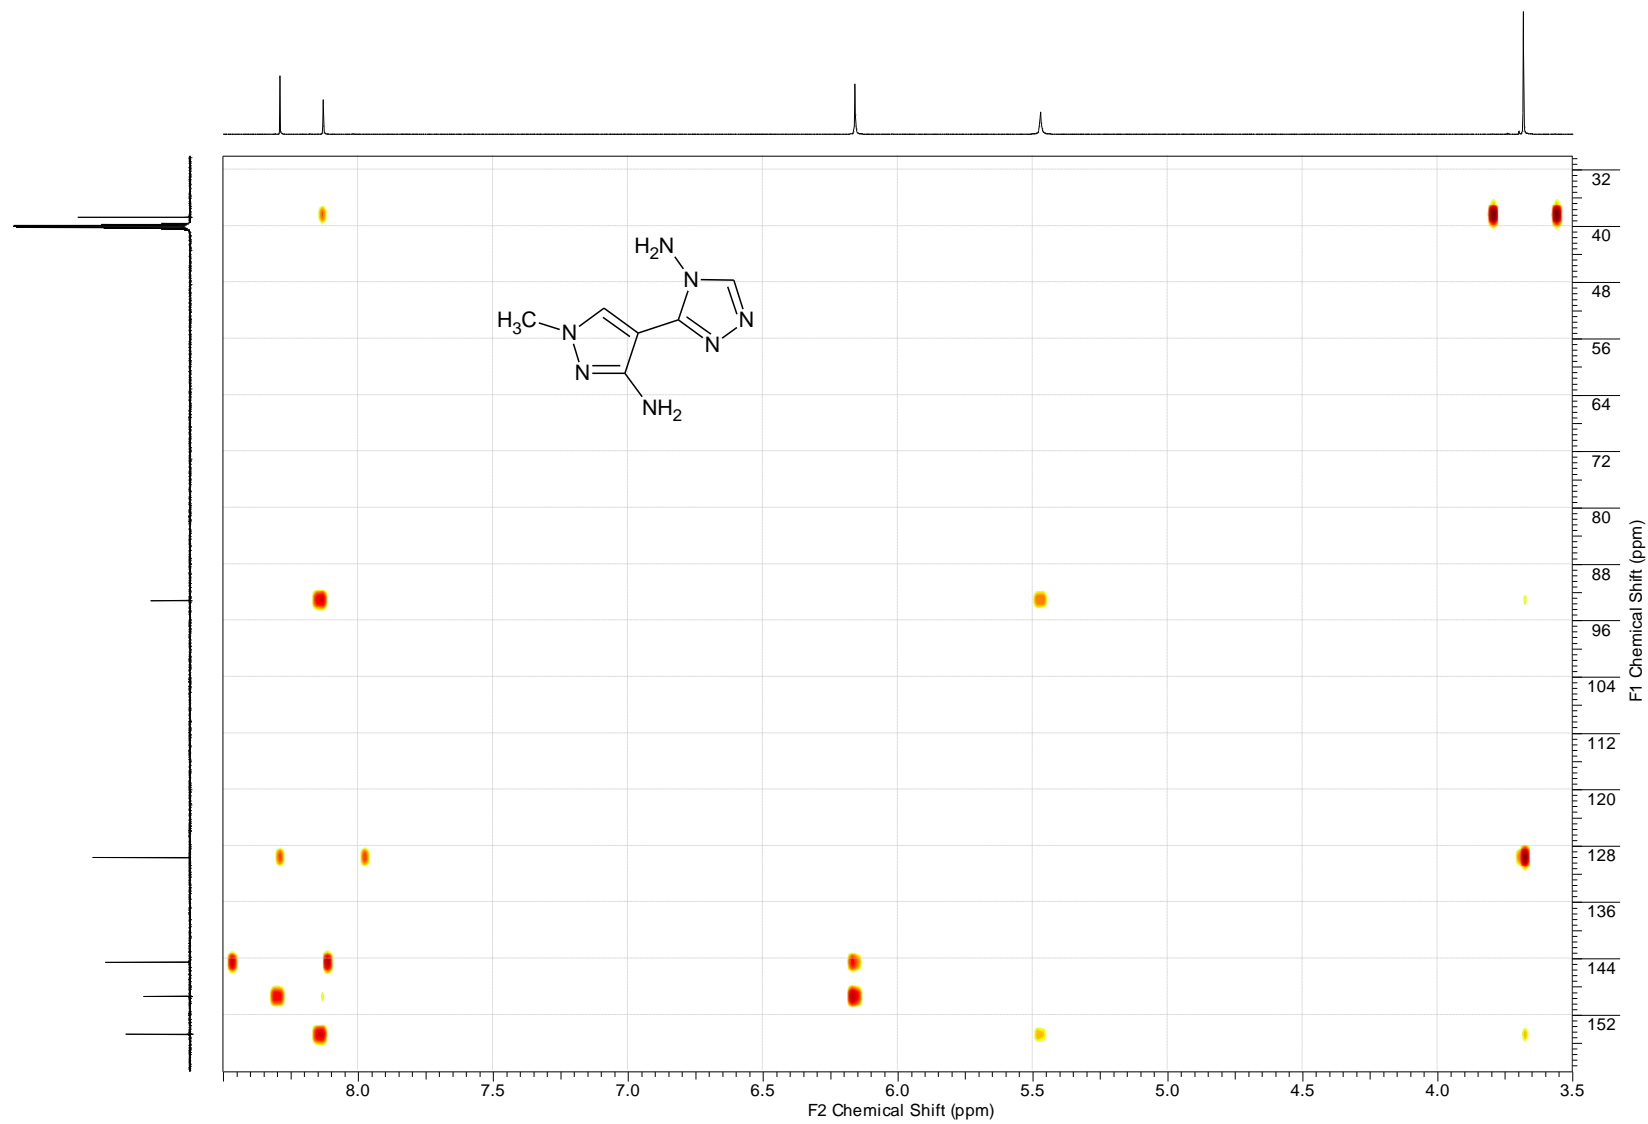

$^1\text{H}, ^1\text{H}$  NOESY spectrum of compound **10** (600.13 MHz, 30 °C,  $\text{DMSO-}d_6$ )

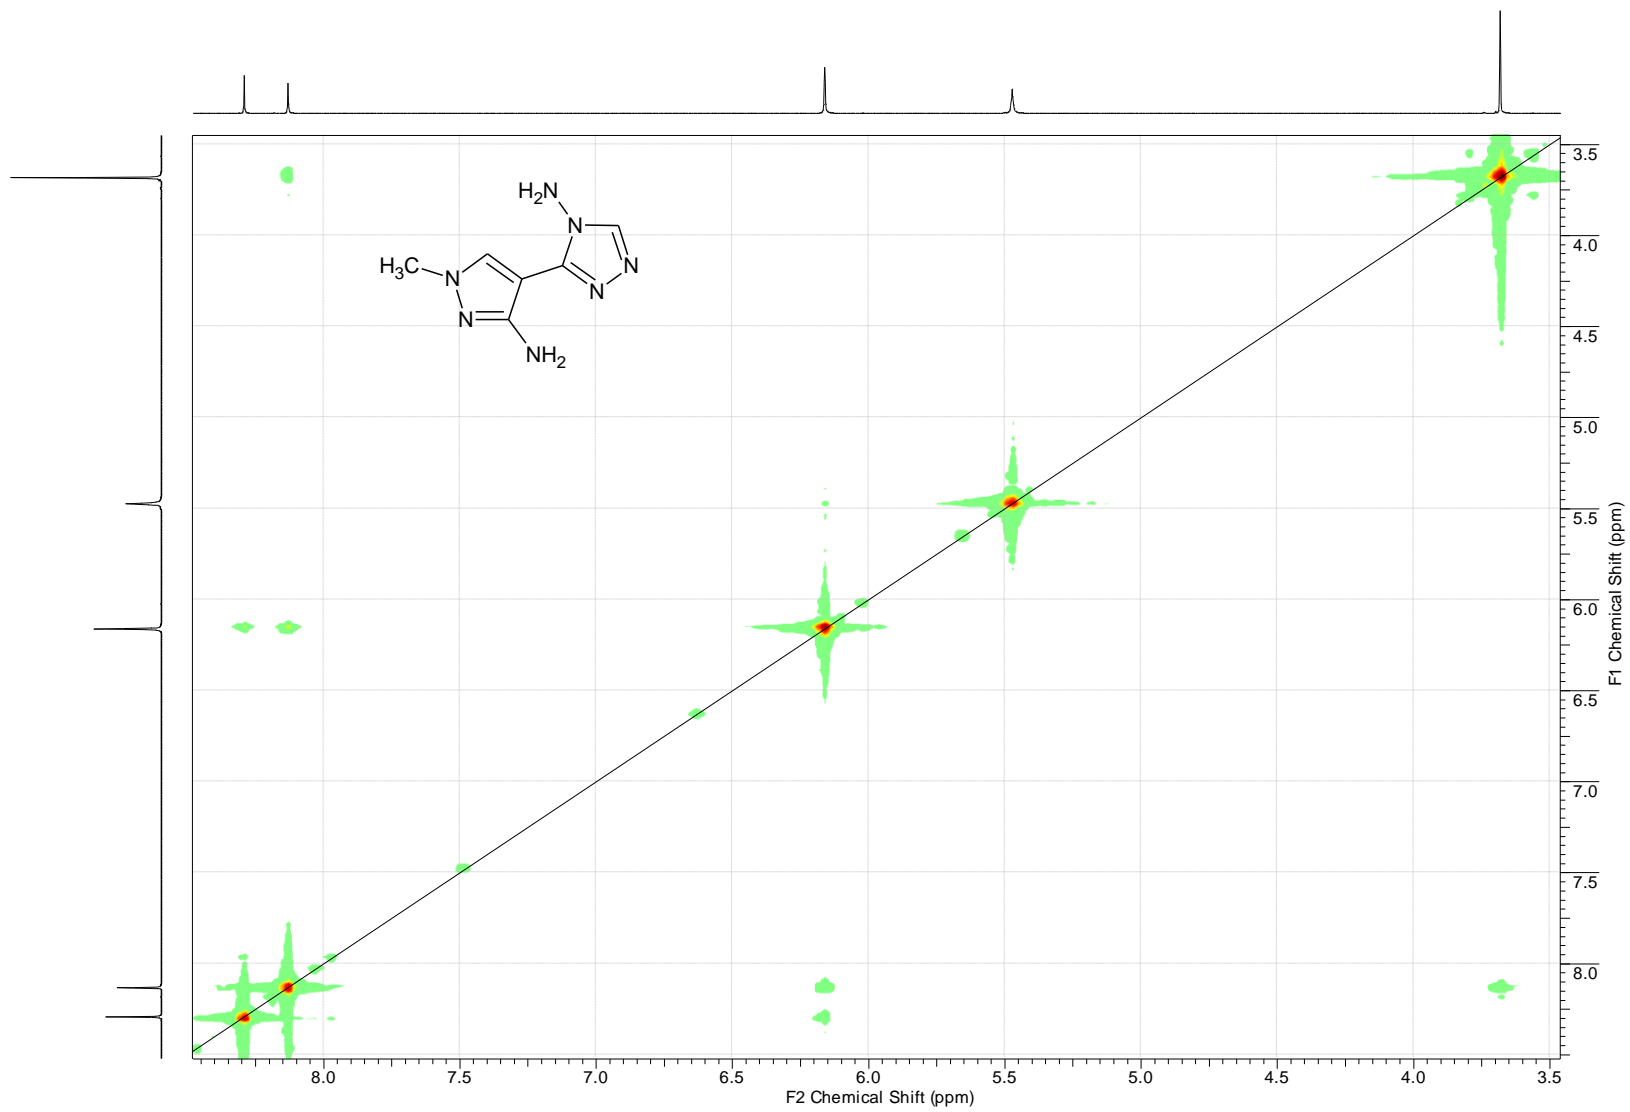

$^1\text{H}$  NMR spectrum of compound **13** (600.13 MHz, 30 °C, DMSO- $d_6$ ).

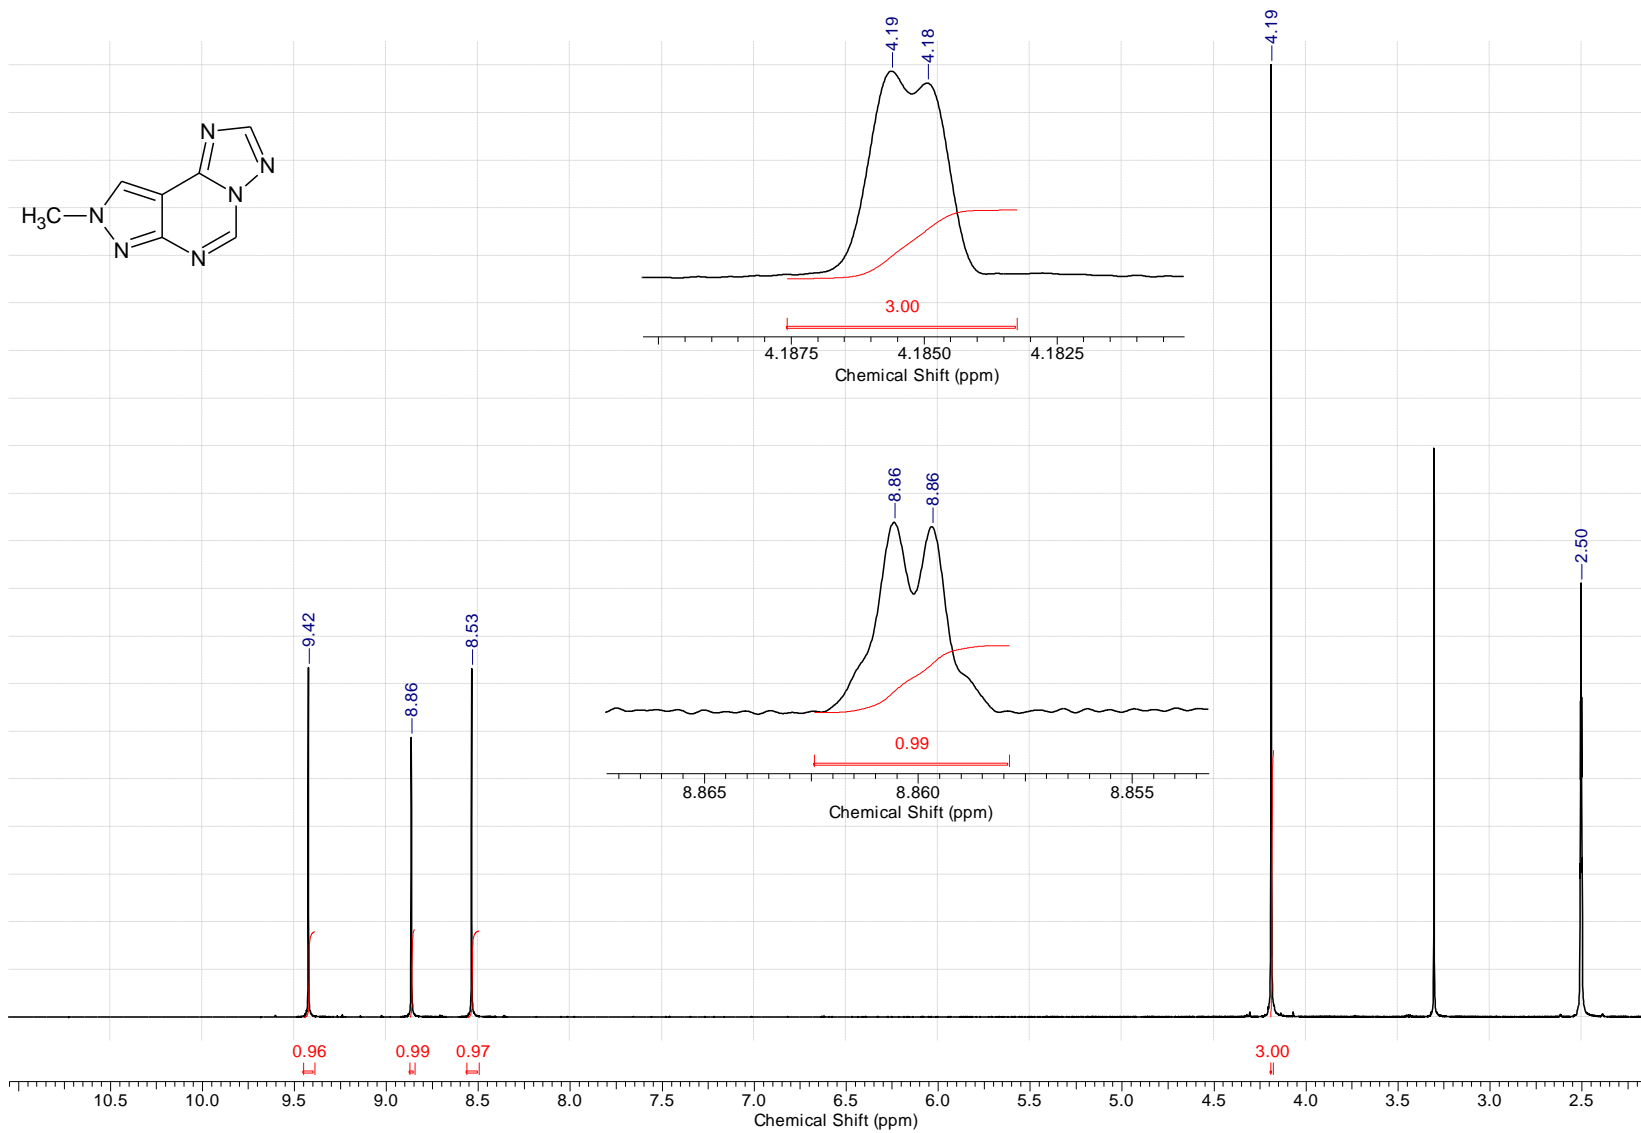

$^{13}\text{C}$  NMR spectrum of compound **13** (150.90 MHz, 30 °C,  $\text{DMSO-}d_6$ )

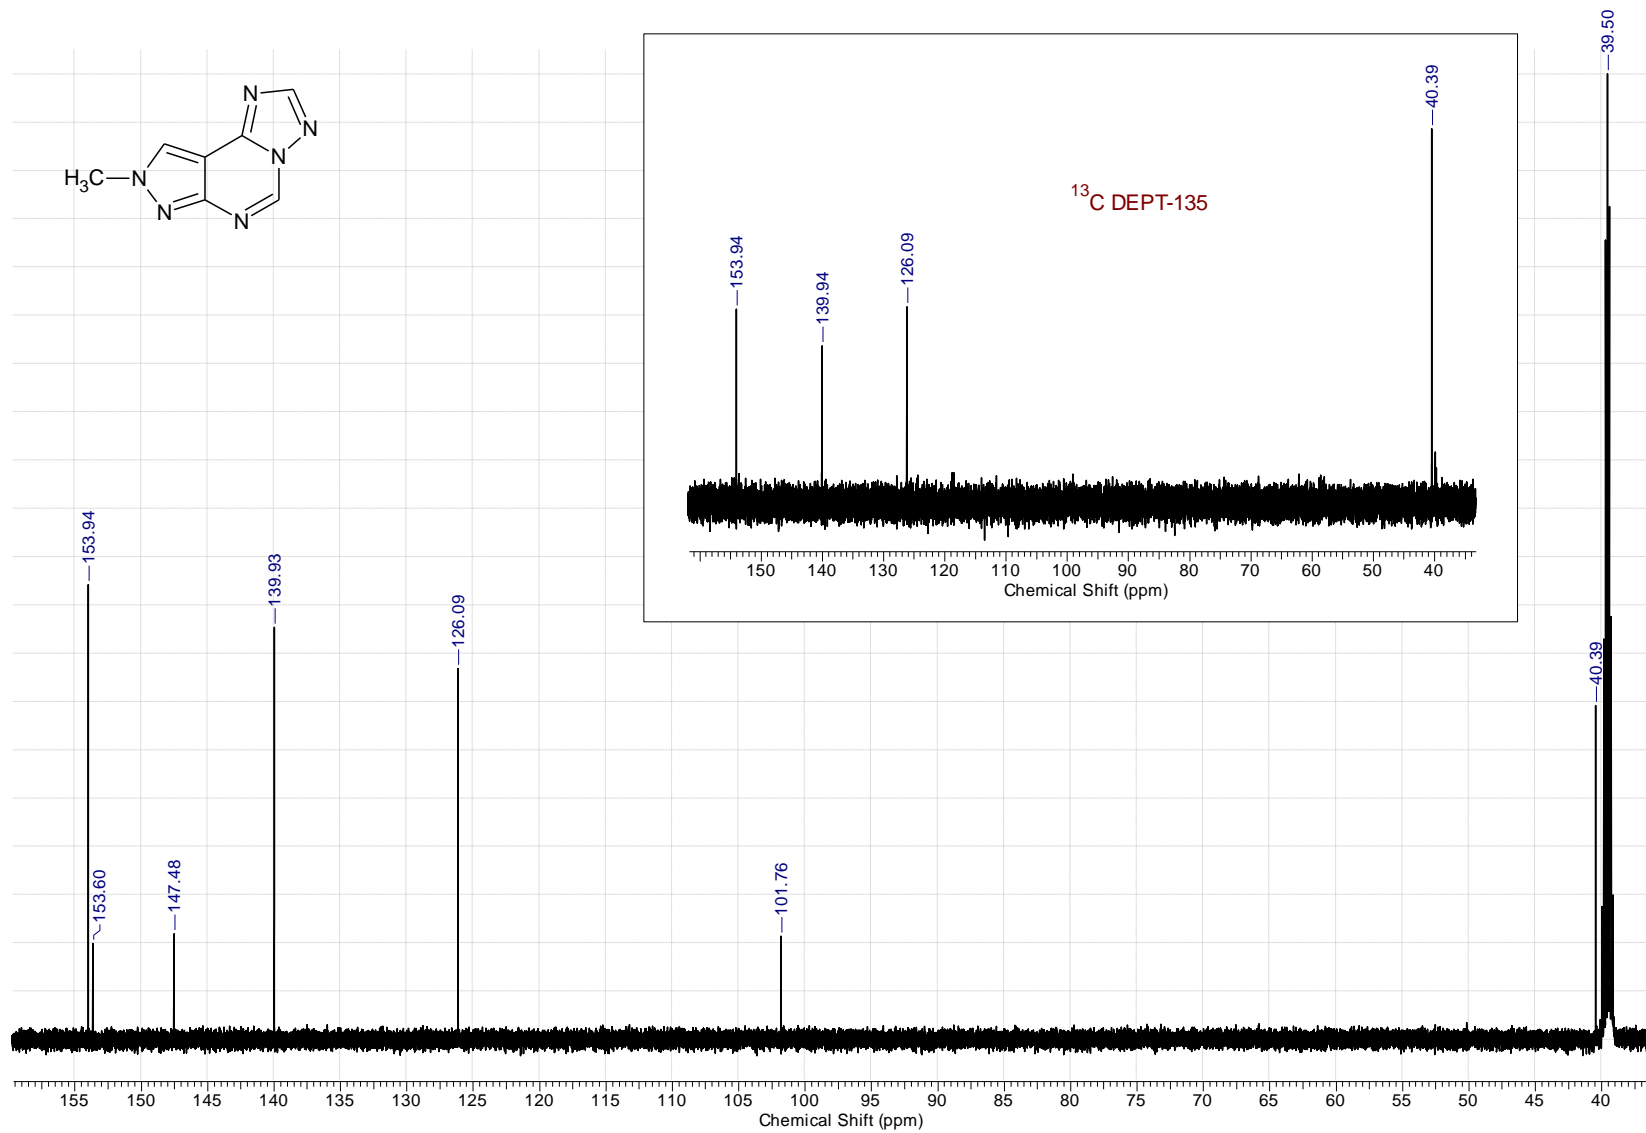

$^1\text{H}$  NMR spectrum of compound **14** (600.13 MHz, 30 °C, DMSO- $d_6$ ).

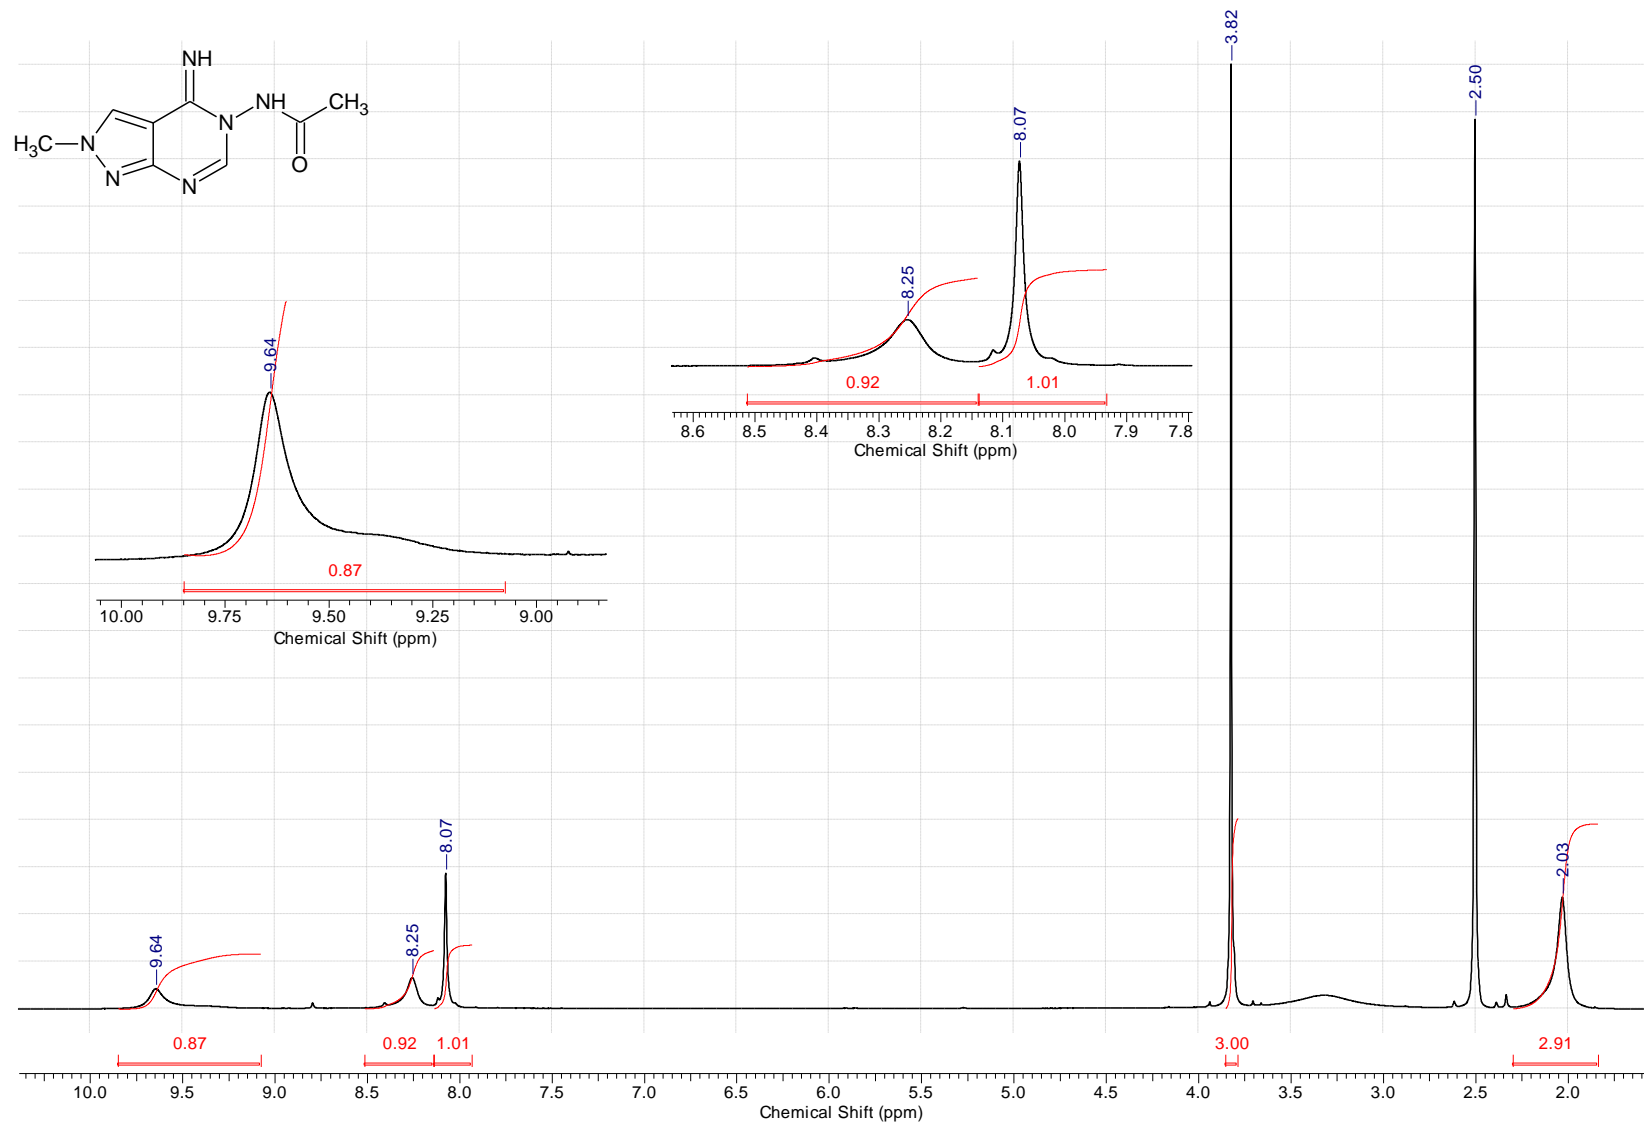

$^1\text{H}$  NMR spectrum of compound **14** (600.13 MHz, 60 °C, DMSO- $d_6$ ).

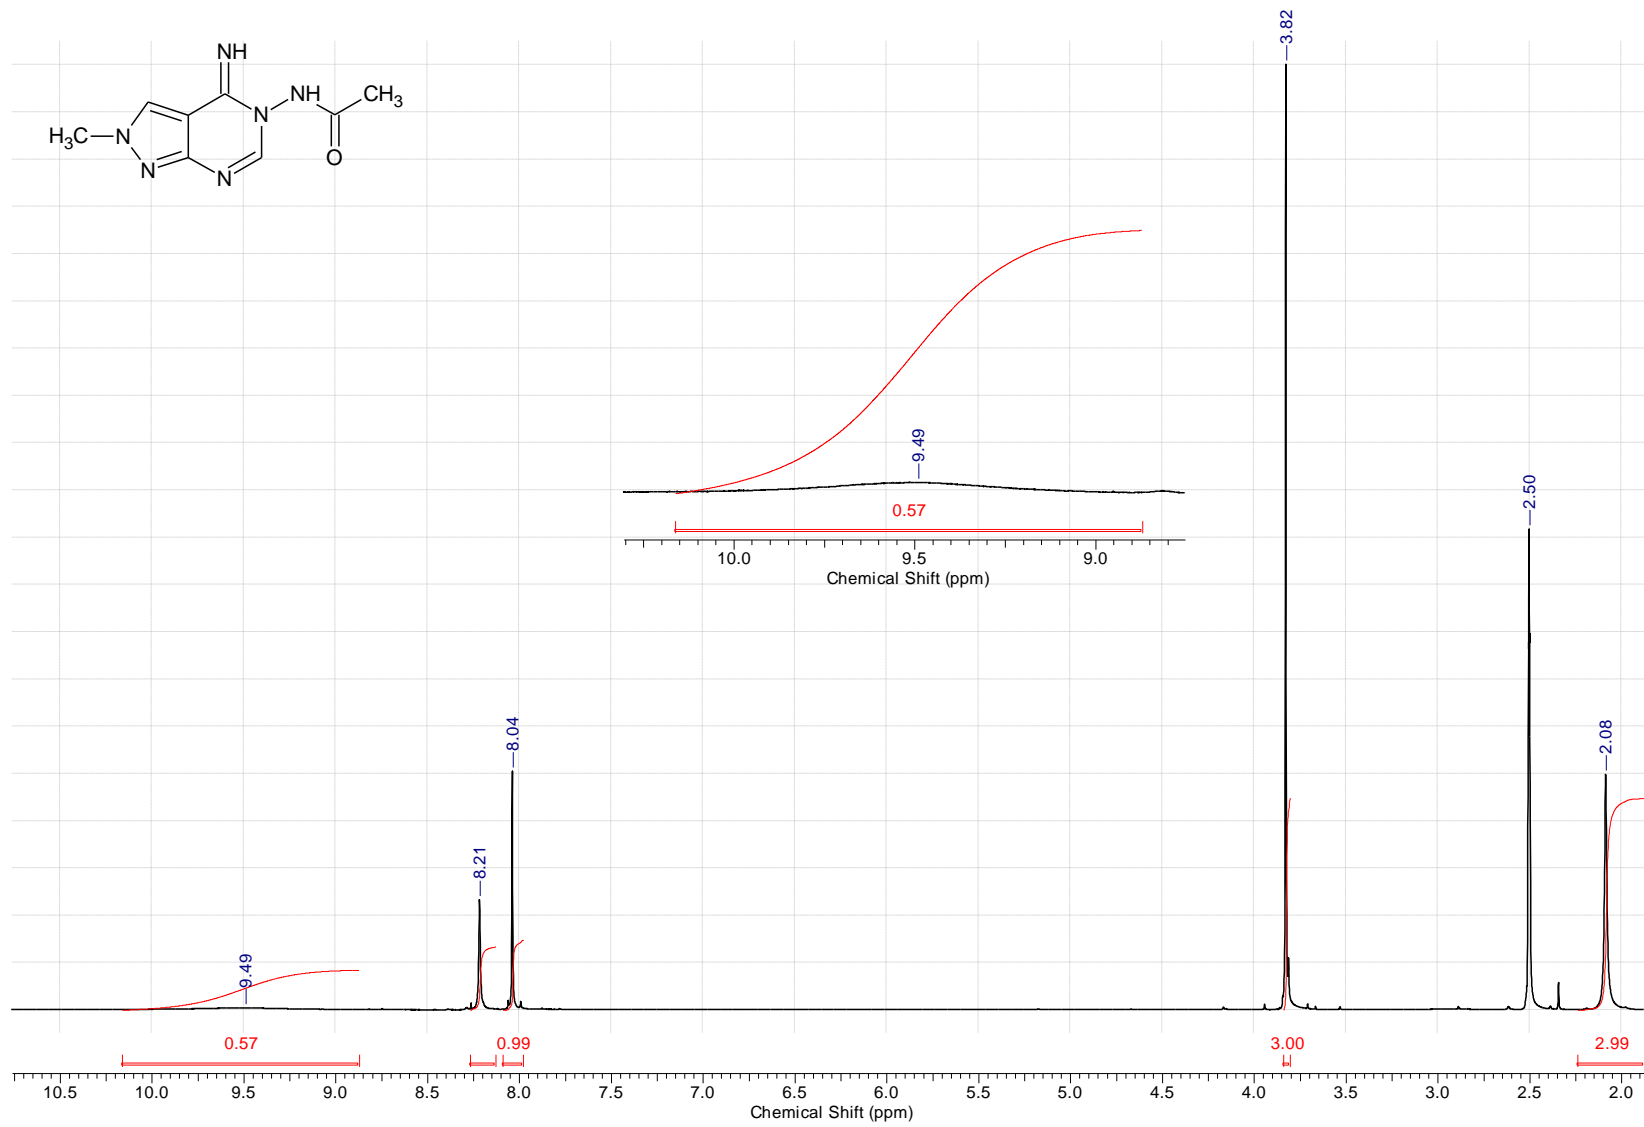



$^1\text{H}$  NMR spectrum of compound **14** (600.13 MHz, 85 °C, DMSO- $d_6$ ).

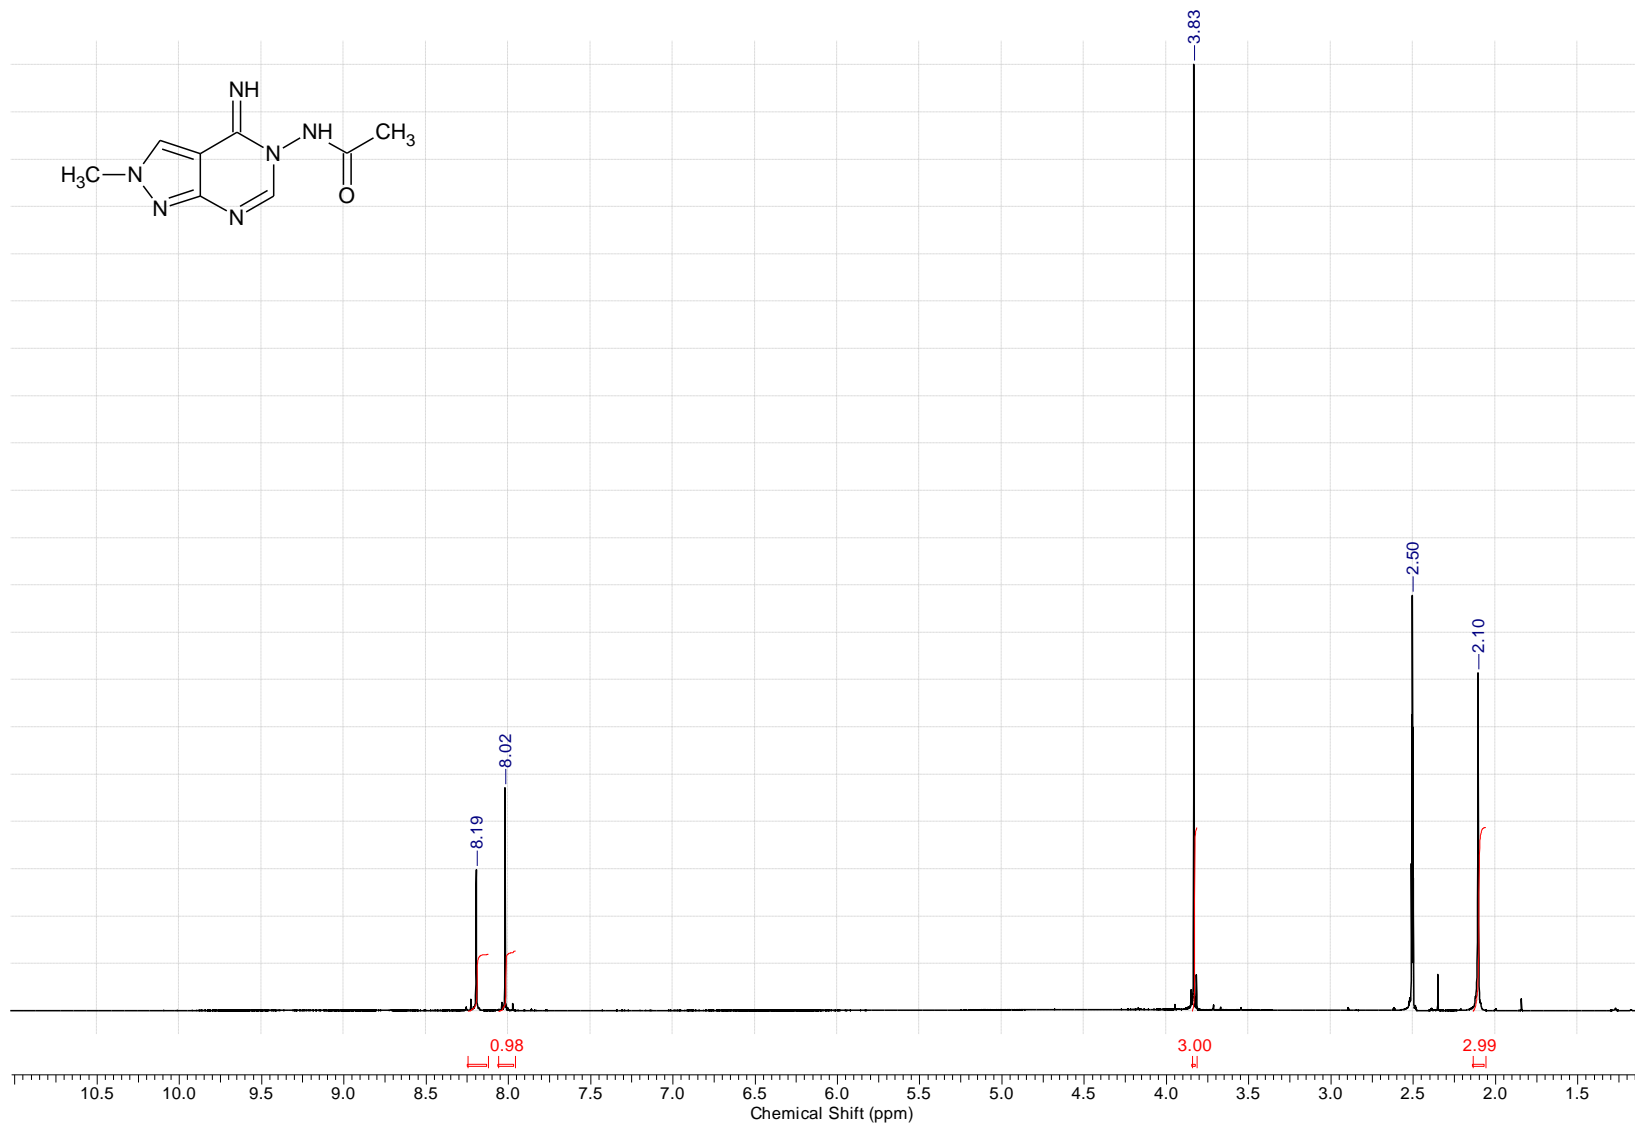

$^{13}\text{C}$  NMR spectrum of compound **14** (150.90 MHz, 85 °C,  $\text{DMSO-}d_6$ )

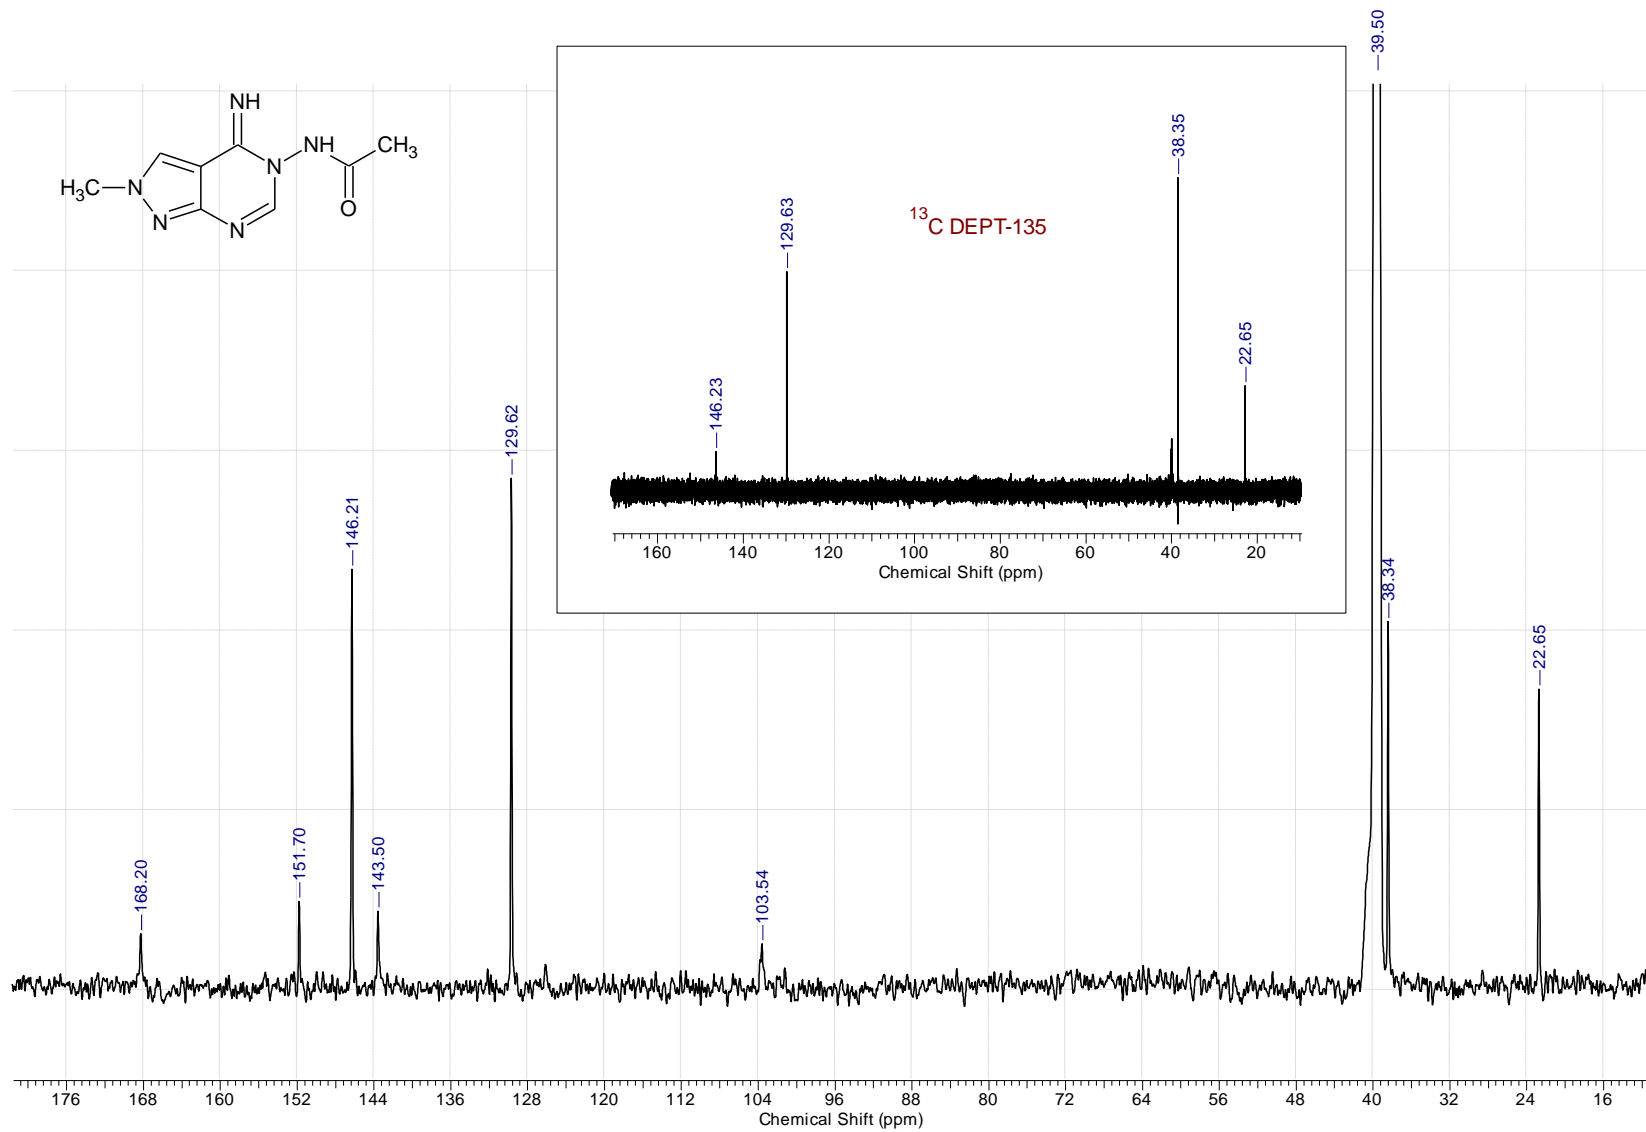

$^1\text{H}, ^{13}\text{C}$  HSQC spectrum of compound **14** (Bruker Avance III, 85 °C,  $\text{DMSO-}d_6$ )

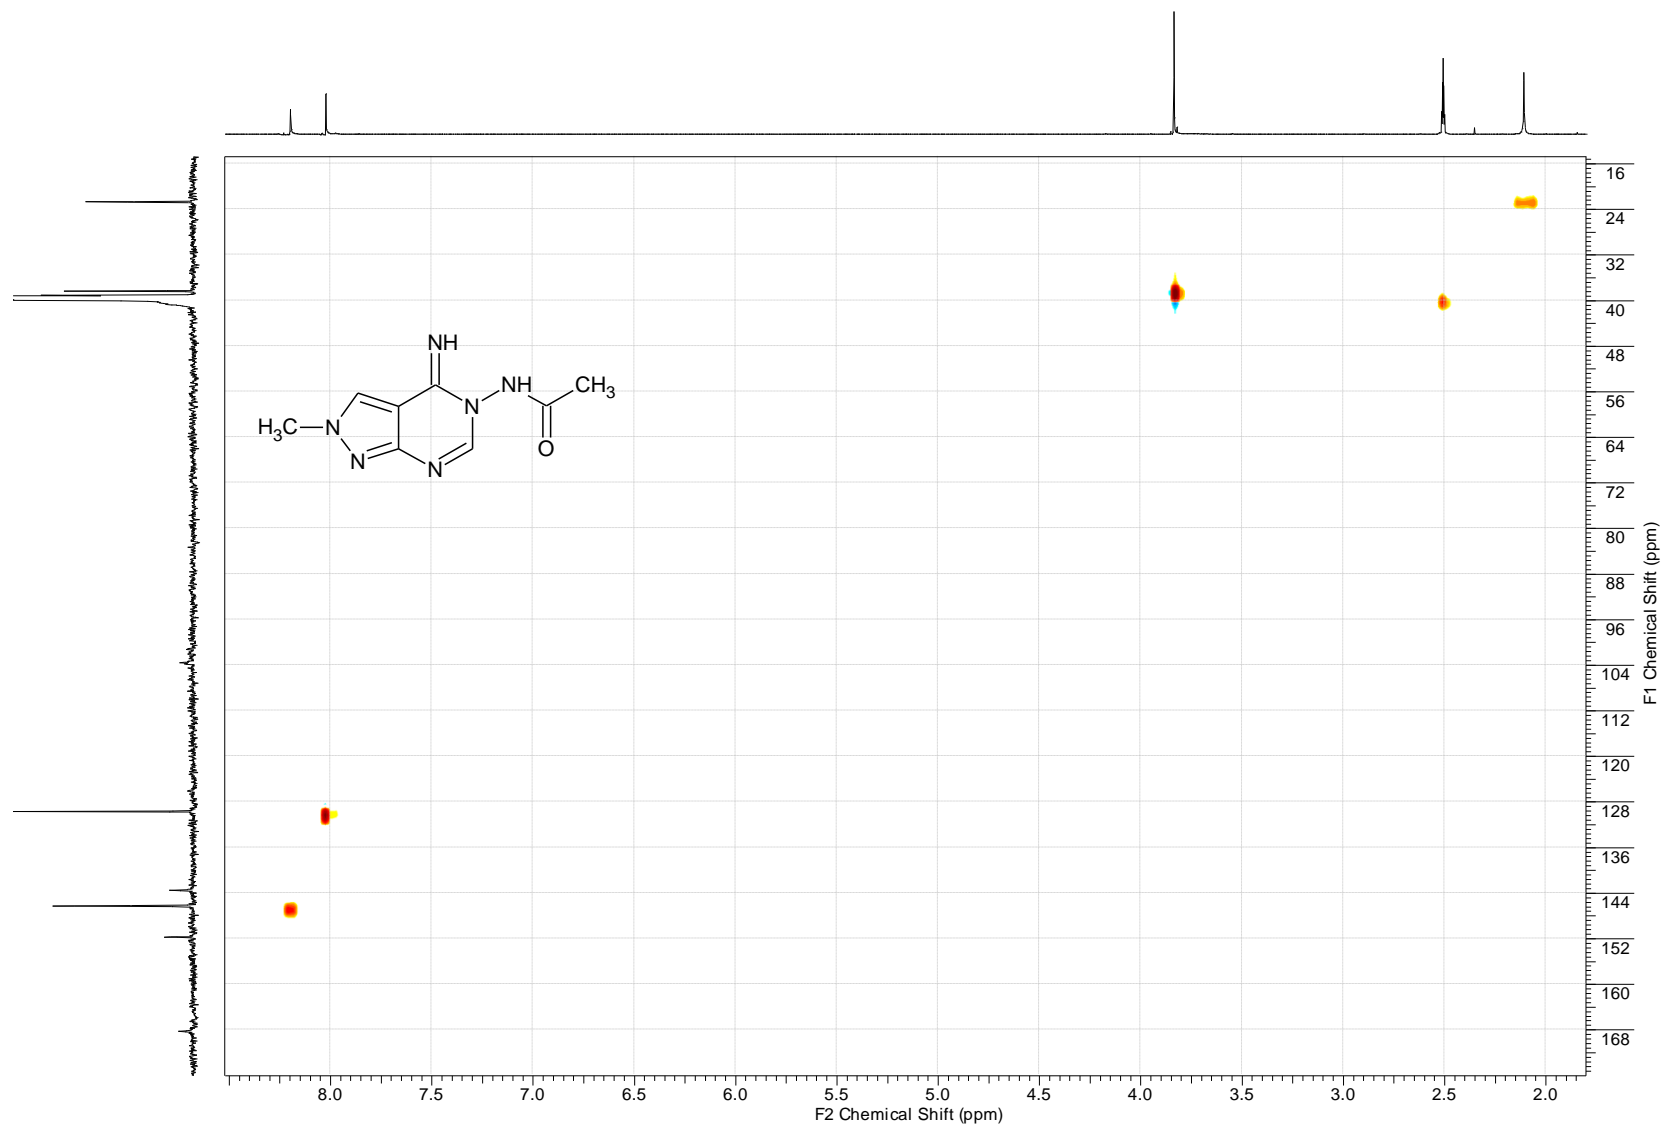

Fragment of  $^1\text{H}$ ,  $^{13}\text{C}$  HMBC spectrum of compound **14** (Bruker Avance III, 85 °C,  $\text{DMSO-}d_6$ )

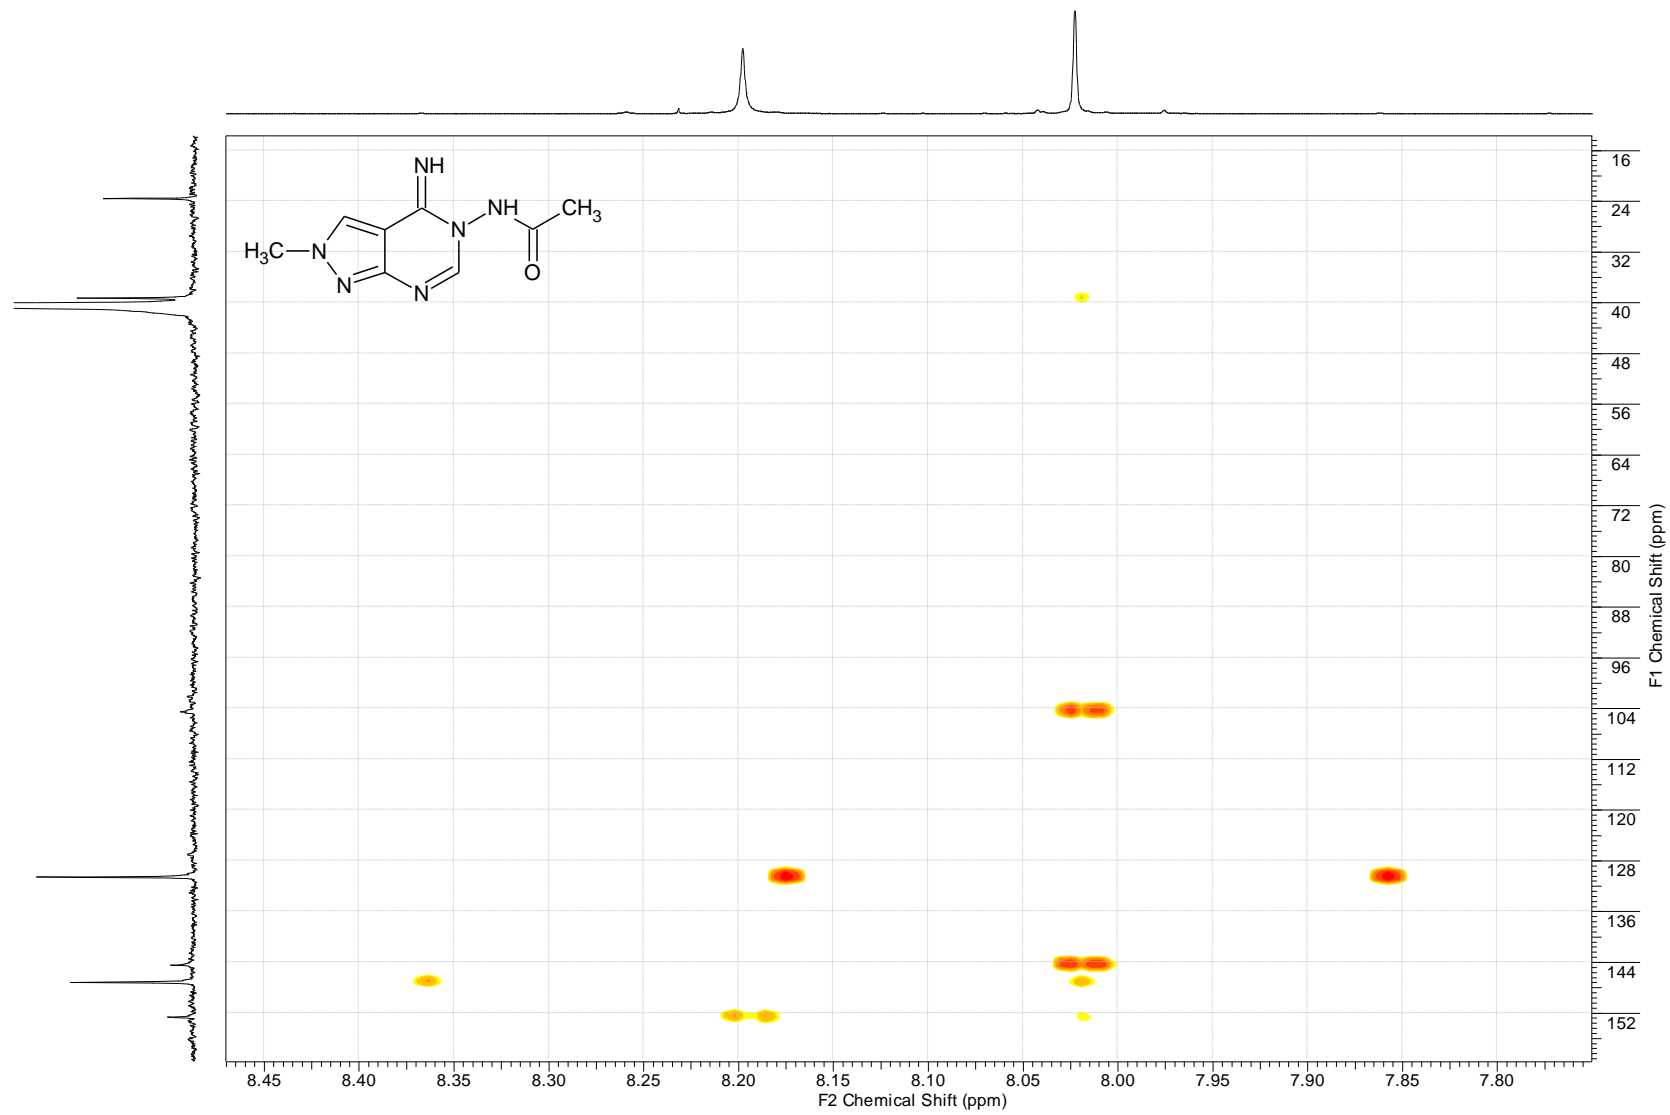

Fragment of  $^1\text{H}$ ,  $^{13}\text{C}$  HMBC spectrum of compound **14** (Bruker Avance III, 85 °C, DMSO- $d_6$ )

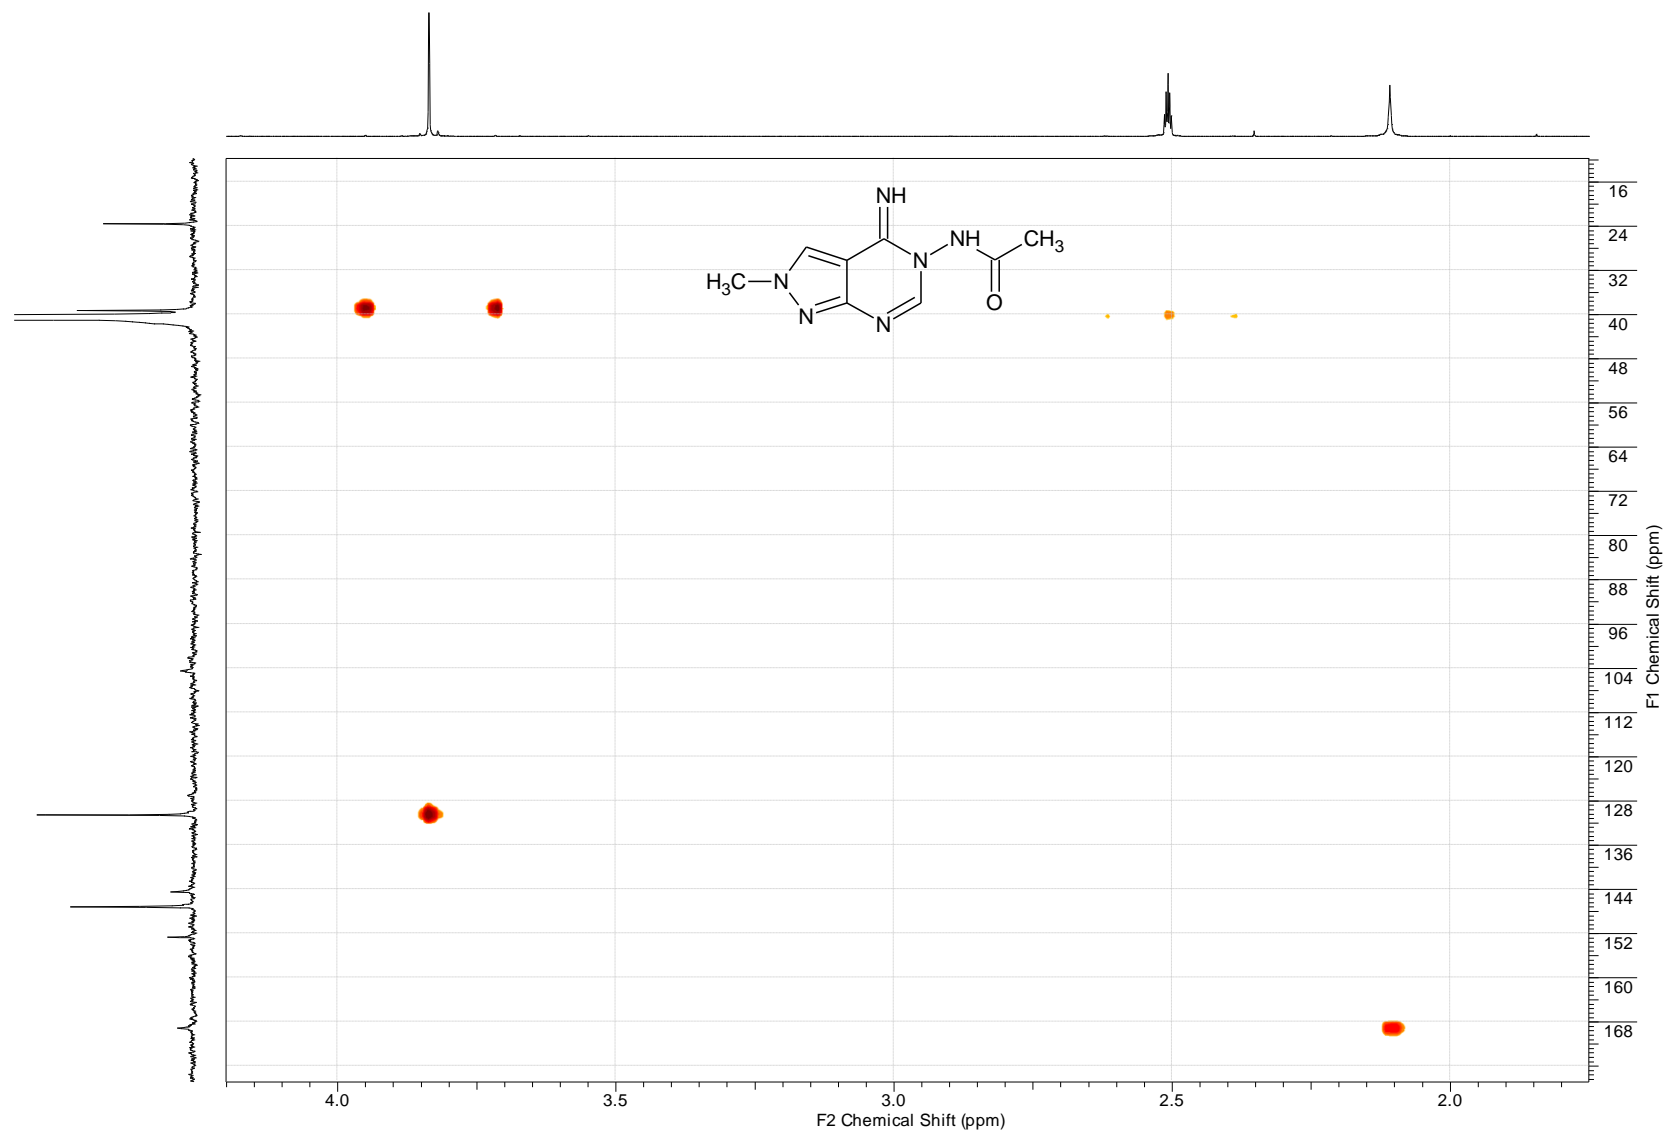

IR spectrum of compound **5** (KBr pellet).

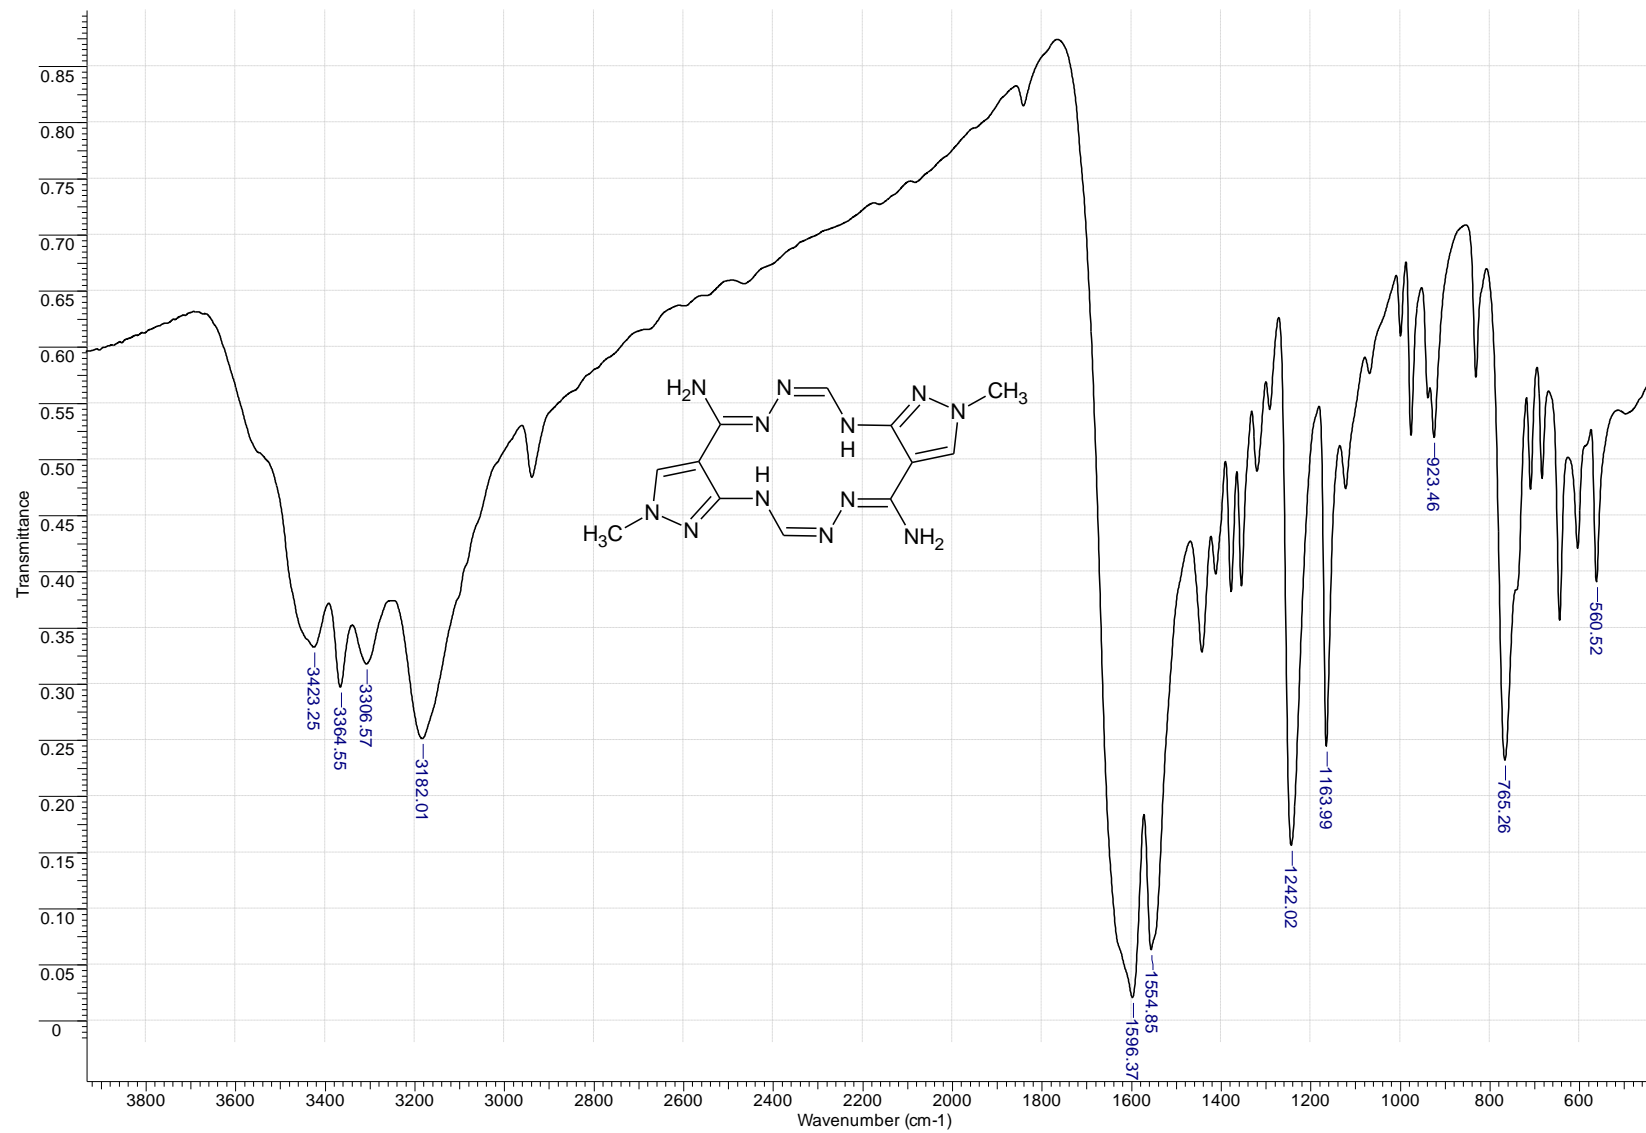

IR spectrum of compound **8** (KBr pellet).

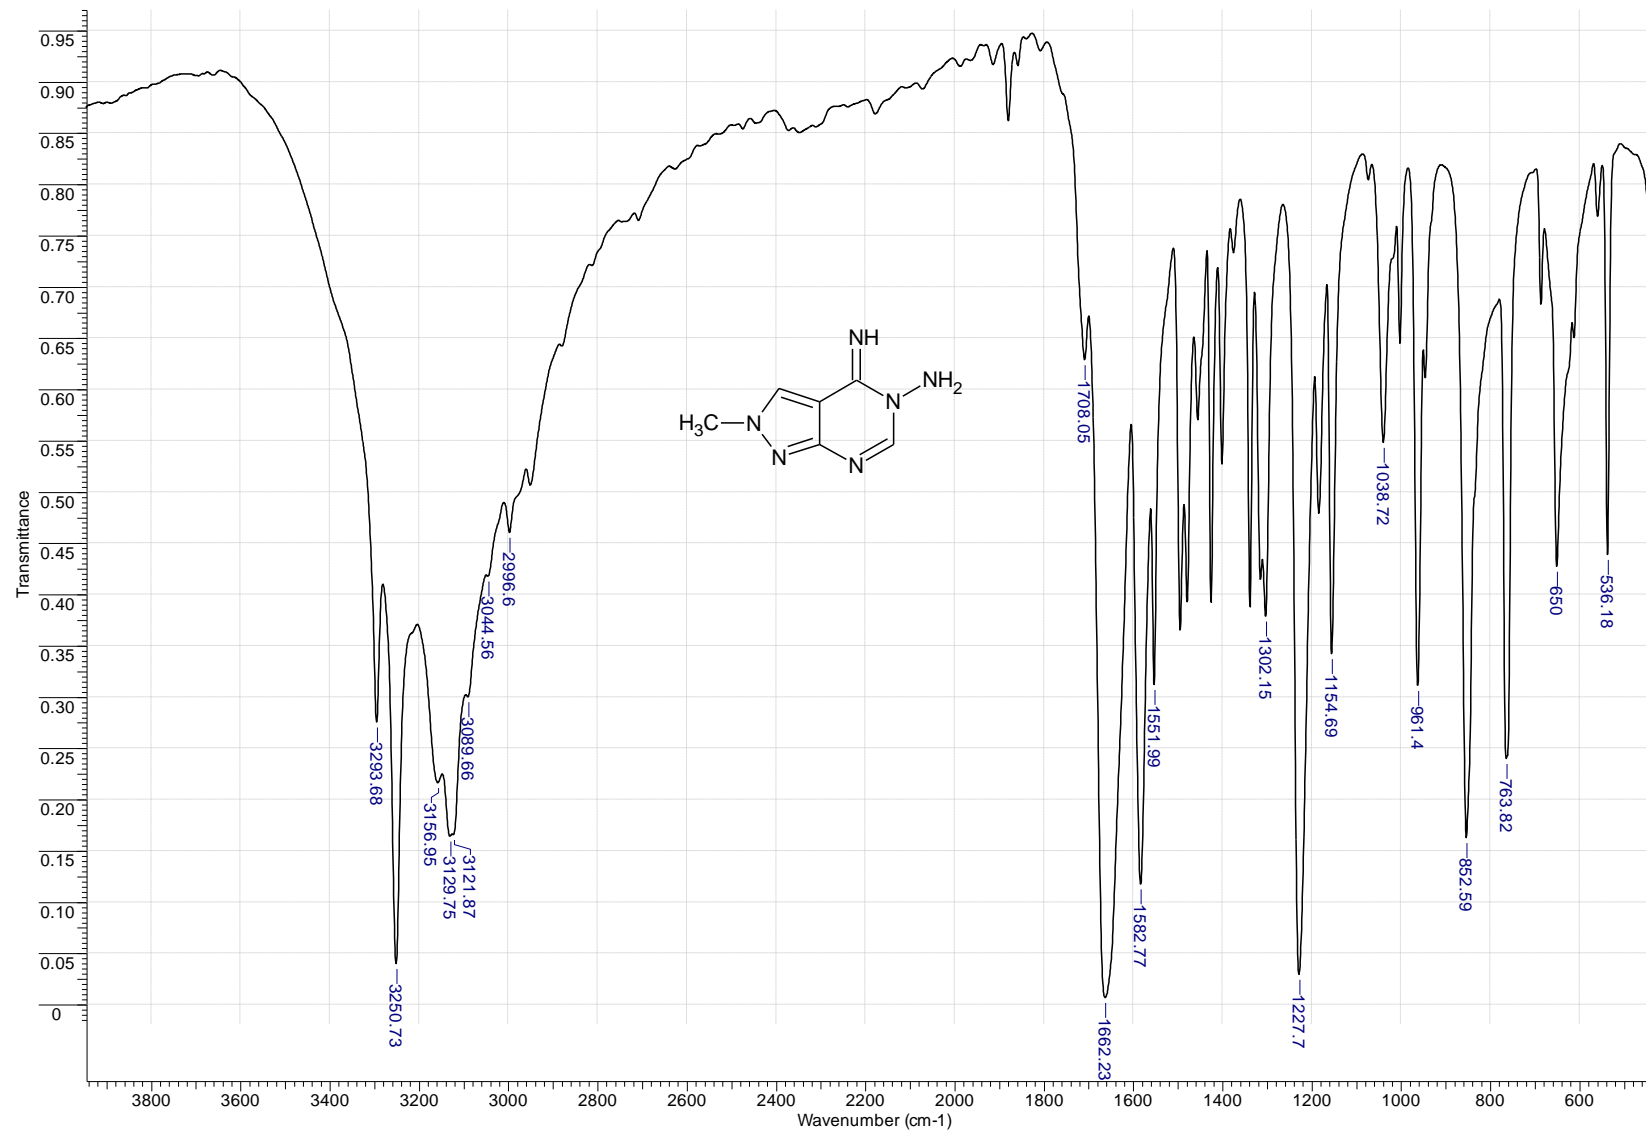

IR spectrum of compound **10** (KBr pellet).

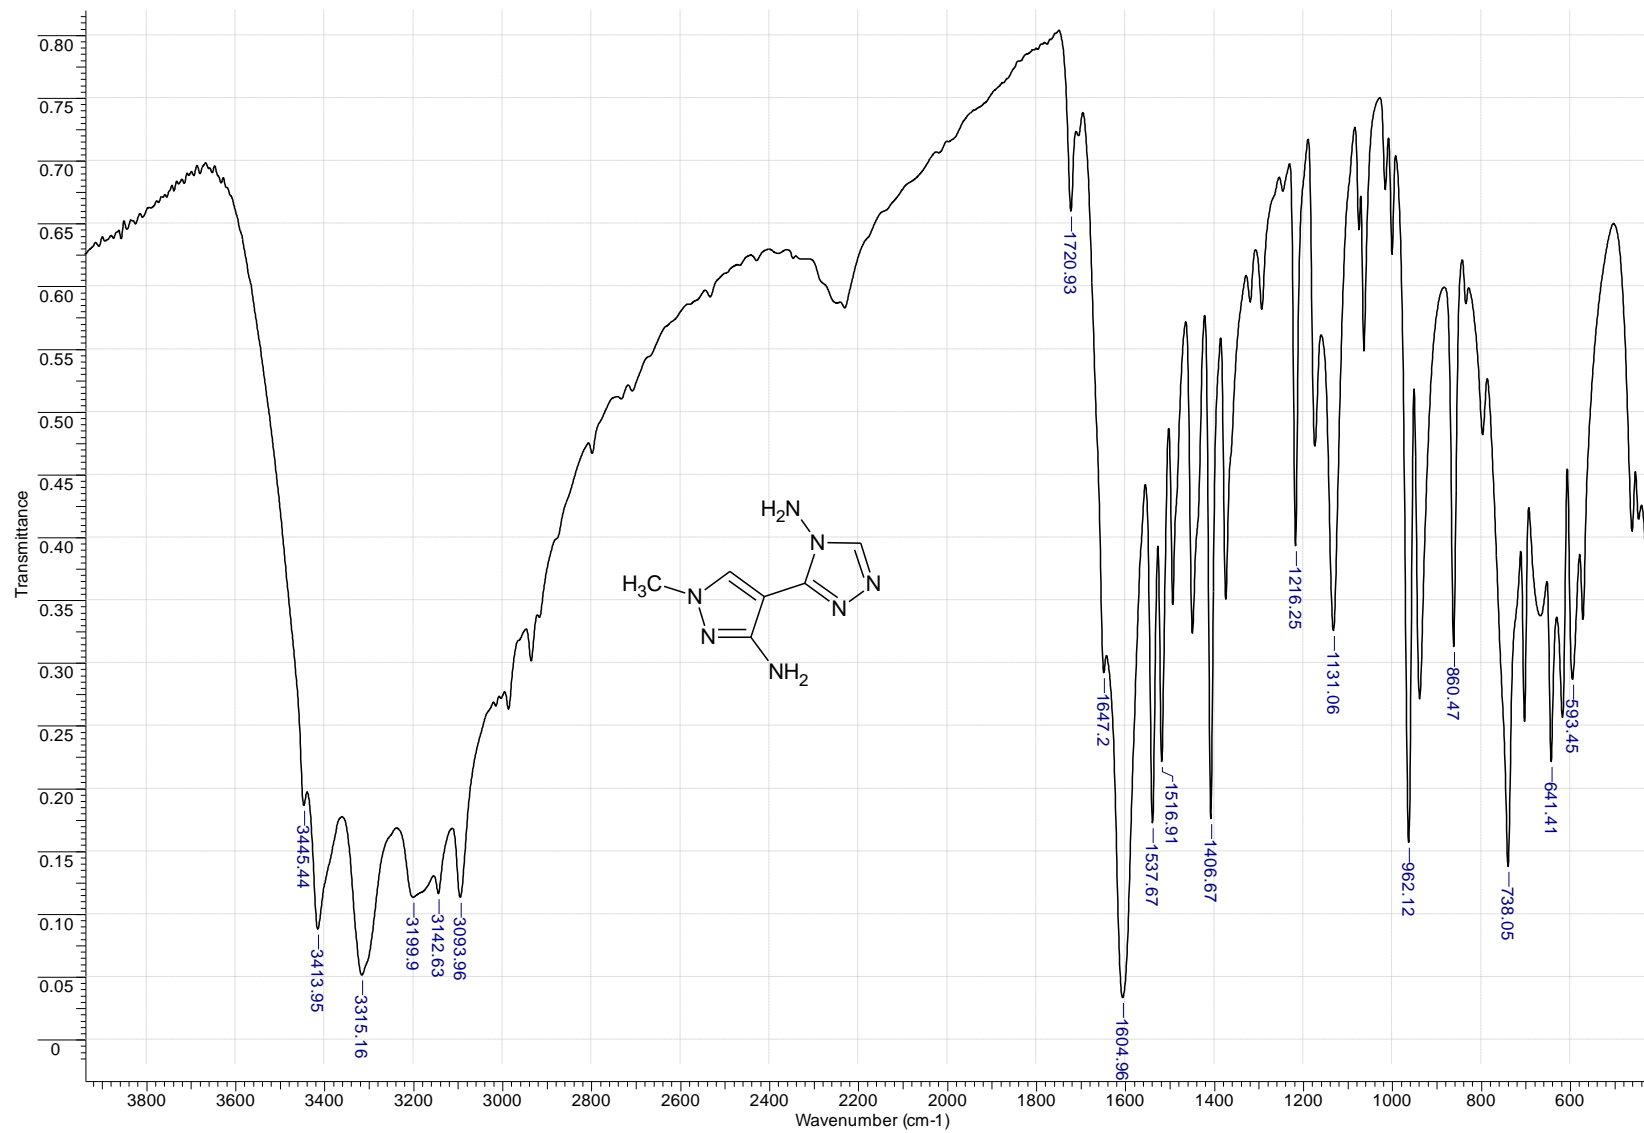



IR spectrum of compound **13** (KBr pellet).

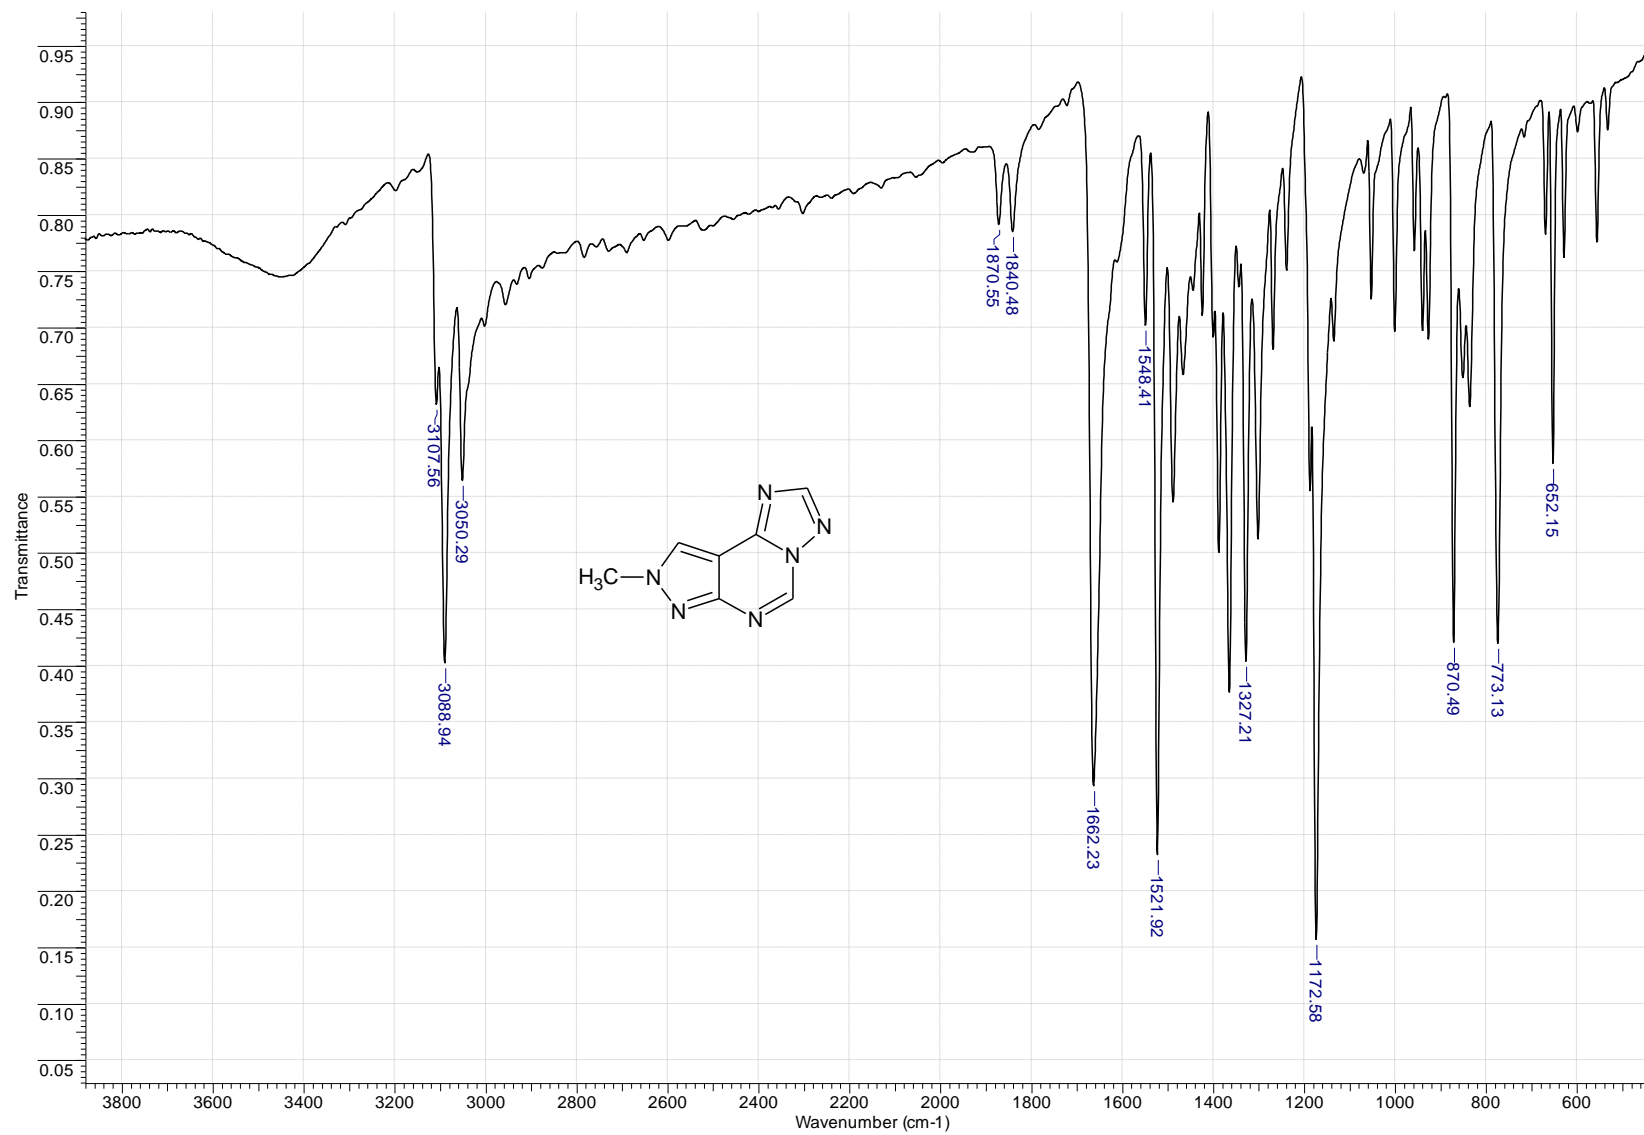

IR spectrum of compound **14** (KBr pellet).

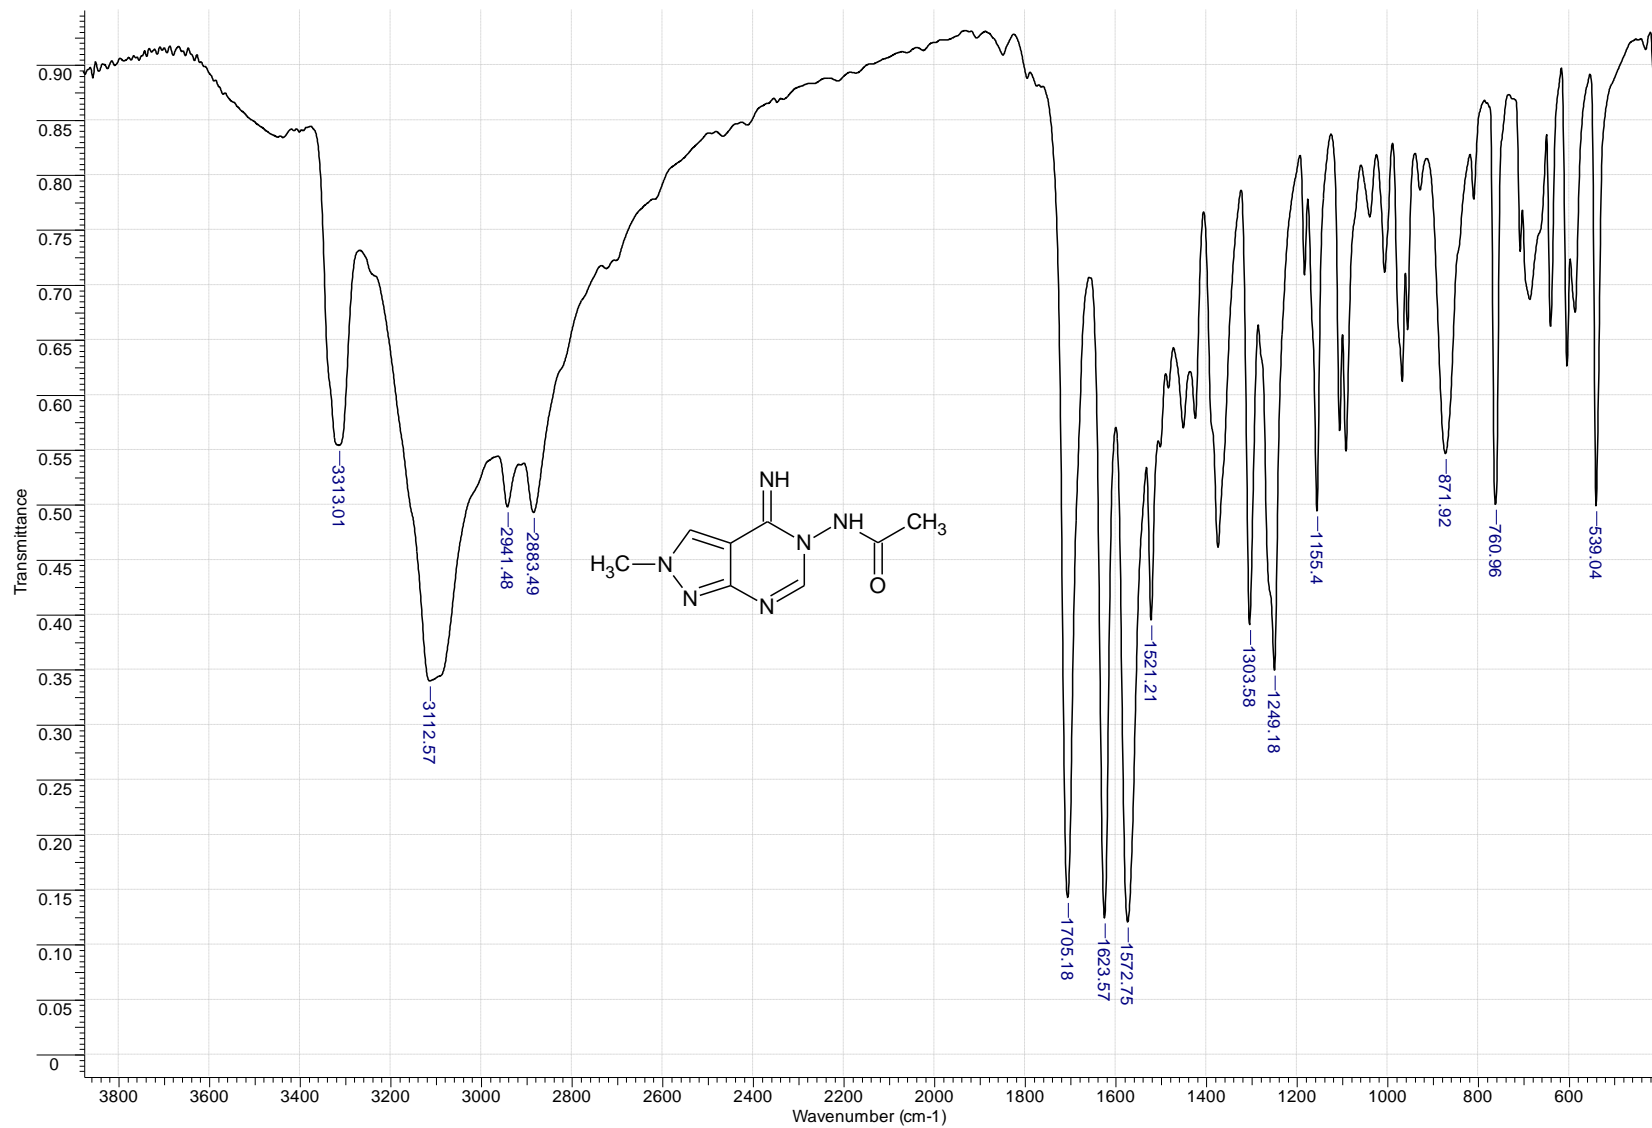

## Computational details

The geometry optimizations were carried out at the B3LYP level of theory using Gaussian 16 suite<sup>1</sup> of quantum chemical programs. Pople's basis sets, 6-311++G(d,p), was employed for geometry optimization. The effect of continuum solvation was incorporated by using the polarizable continuum model (PCM). Enthalpies and Gibbs free energies were obtained by adding unscaled zero-point vibrational energy corrections (ZPVE) and thermal contributions to the energies (temperature 298.150 Kelvin, pressure 1.000 atm). Carbon chemical shifts of the prepared compounds in DMSO were calculated by the GIAO method at the PBE1PBE/6-311+G(2d,p) level of theory using the DFT B3LYP/6-311++G(d,p) optimized geometries (DMSO solution) and applying a multi-standard approach.<sup>2</sup>

DMSO solution

**Pyrazolopyrimidine 8**

**Table S1:** Cartesian coordinates and energies of the optimized geometry of (Z)-8.

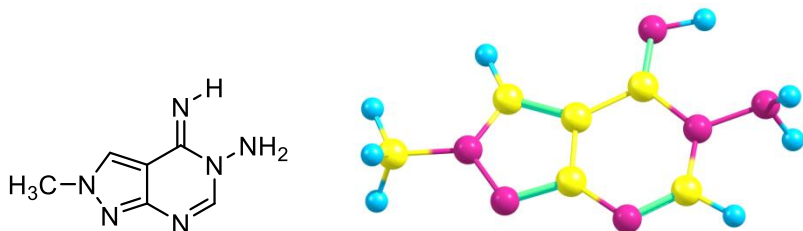

|                                              |                             |
|----------------------------------------------|-----------------------------|
| Electronic Energy =                          | -562.081809772 a.u.         |
| Zero-point correction=                       | 0.156283 (Hartree/Particle) |
| Thermal correction to Energy=                | 0.166283                    |
| Thermal correction to Enthalpy=              | 0.167227                    |
| Thermal correction to Gibbs Free Energy=     | 0.120815                    |
| Sum of electronic and zero-point Energies=   | -561.925527                 |
| Sum of electronic and thermal Energies=      | -561.915527                 |
| Sum of electronic and thermal Enthalpies=    | -561.914583                 |
| Sum of electronic and thermal Free Energies= | -561.960995                 |

Standard orientation:

| Center Number | Atomic Number | Atomic Type | Coordinates (Angstroms) |           |           |
|---------------|---------------|-------------|-------------------------|-----------|-----------|
|               |               |             | X                       | Y         | Z         |
| 1             | 6             | 0           | -3.843614               | 0.277386  | -0.000004 |
| 2             | 7             | 0           | -2.395175               | 0.124791  | -0.000001 |
| 3             | 6             | 0           | -1.470688               | 1.108651  | 0.000002  |
| 4             | 6             | 0           | -0.234361               | 0.479153  | 0.000005  |
| 5             | 6             | 0           | -0.538854               | -0.903959 | 0.000002  |
| 6             | 7             | 0           | -1.856193               | -1.118979 | -0.000002 |
| 7             | 6             | 0           | 1.134464                | 0.945464  | 0.000002  |
| 8             | 7             | 0           | 1.500151                | 2.172611  | 0.000003  |
| 9             | 7             | 0           | 2.033945                | -0.162888 | -0.000001 |
| 10            | 6             | 0           | 1.624237                | -1.481683 | 0.000002  |
| 11            | 7             | 0           | 0.405521                | -1.910371 | 0.000004  |
| 12            | 7             | 0           | 3.406708                | 0.149333  | -0.000008 |
| 13            | 1             | 0           | 3.849656                | -0.232316 | -0.829985 |
| 14            | 1             | 0           | 3.849662                | -0.232303 | 0.829972  |
| 15            | 1             | 0           | -4.081474               | 1.339039  | -0.000015 |
| 16            | 1             | 0           | -4.262955               | -0.191500 | 0.890559  |
| 17            | 1             | 0           | -4.262952               | -0.191517 | -0.890559 |
| 18            | 1             | 0           | -1.748188               | 2.150003  | 0.000002  |
| 19            | 1             | 0           | 2.520012                | 2.220061  | -0.000001 |
| 20            | 1             | 0           | 2.444428                | -2.193018 | 0.000006  |

**Table S2:** Cartesian coordinates and energies of the optimized geometry of (*E*)-8.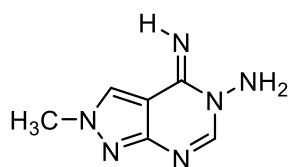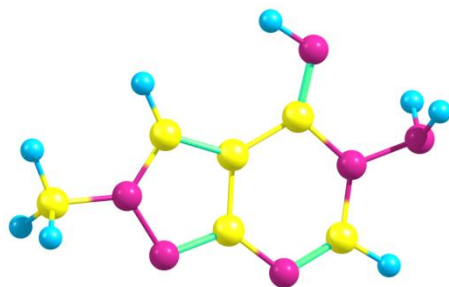

|                                              |                             |
|----------------------------------------------|-----------------------------|
| Electronic Energy =                          | -562.084576037 a.u.         |
| Zero-point correction=                       | 0.156209 (Hartree/Particle) |
| Thermal correction to Energy=                | 0.166341                    |
| Thermal correction to Enthalpy=              | 0.167286                    |
| Thermal correction to Gibbs Free Energy=     | 0.120507                    |
| Sum of electronic and zero-point Energies=   | -561.928367                 |
| Sum of electronic and thermal Energies=      | -561.918235                 |
| Sum of electronic and thermal Enthalpies=    | -561.917290                 |
| Sum of electronic and thermal Free Energies= | -561.964069                 |

## Standard orientation:

| Center Number | Atomic Number | Atomic Type | Coordinates (Angstroms) |           |           |
|---------------|---------------|-------------|-------------------------|-----------|-----------|
|               |               |             | X                       | Y         | Z         |
| 1             | 6             | 0           | -3.830027               | 0.294008  | 0.000002  |
| 2             | 7             | 0           | -2.382453               | 0.130649  | 0.000000  |
| 3             | 6             | 0           | -1.452388               | 1.107117  | -0.000004 |
| 4             | 6             | 0           | -0.218627               | 0.468059  | -0.000006 |
| 5             | 6             | 0           | -0.534583               | -0.915113 | -0.000001 |
| 6             | 7             | 0           | -1.853766               | -1.117618 | 0.000002  |
| 7             | 6             | 0           | 1.157731                | 0.912242  | -0.000001 |
| 8             | 7             | 0           | 1.665566                | 2.092643  | 0.000005  |
| 9             | 7             | 0           | 2.039228                | -0.197529 | -0.000002 |
| 10            | 6             | 0           | 1.624259                | -1.508050 | 0.000000  |
| 11            | 7             | 0           | 0.400247                | -1.927294 | 0.000001  |
| 12            | 7             | 0           | 3.434386                | 0.010678  | 0.000001  |
| 13            | 1             | 0           | 3.658000                | 0.583332  | 0.812119  |
| 14            | 1             | 0           | 3.658002                | 0.583336  | -0.812115 |
| 15            | 1             | 0           | 0.927778                | 2.793286  | 0.000004  |
| 16            | 1             | 0           | -4.060494               | 1.357218  | 0.000001  |
| 17            | 1             | 0           | -4.251834               | -0.172368 | 0.890601  |
| 18            | 1             | 0           | -4.251837               | -0.172371 | -0.890593 |
| 19            | 1             | 0           | -1.728220               | 2.149506  | -0.000008 |
| 20            | 1             | 0           | 2.447957                | -2.212224 | 0.000001  |

## Pyrazolopyrimidine 9 and its tautomers

**Table S3:** Cartesian coordinates and energies of the optimized geometry of the *s-cis*-conformer of **9**.

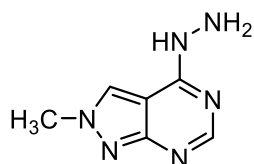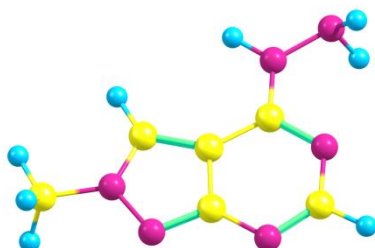

|                                               |                             |
|-----------------------------------------------|-----------------------------|
| Electronic Energy =                           | -562.091266870 a.u.         |
| Zero-point correction =                       | 0.155971 (Hartree/Particle) |
| Thermal correction to Energy =                | 0.166608                    |
| Thermal correction to Enthalpy =              | 0.167552                    |
| Thermal correction to Gibbs Free Energy =     | 0.118851                    |
| Sum of electronic and zero-point Energies =   | -561.935296                 |
| Sum of electronic and thermal Energies =      | -561.924659                 |
| Sum of electronic and thermal Enthalpies =    | -561.923715                 |
| Sum of electronic and thermal Free Energies = | -561.972416                 |

Standard orientation:

| Center Number | Atomic Number | Atomic Type | Coordinates (Angstroms) |           |           |
|---------------|---------------|-------------|-------------------------|-----------|-----------|
|               |               |             | X                       | Y         | Z         |
| 1             | 6             | 0           | 3.645236                | -0.995145 | 0.000000  |
| 2             | 7             | 0           | 2.284030                | -0.474248 | -0.000001 |
| 3             | 6             | 0           | 1.146801                | -1.192873 | -0.000001 |
| 4             | 6             | 0           | 0.106568                | -0.262797 | 0.000000  |
| 5             | 6             | 0           | 0.757629                | 1.004395  | 0.000001  |
| 6             | 7             | 0           | 2.090970                | 0.866878  | 0.000000  |
| 7             | 6             | 0           | -1.320038               | -0.248517 | 0.000001  |
| 8             | 7             | 0           | -2.042788               | -1.393737 | 0.000003  |
| 9             | 7             | 0           | -1.959318               | 0.921069  | -0.000001 |
| 10            | 6             | 0           | -1.216302               | 2.057720  | -0.000000 |
| 11            | 7             | 0           | 0.092906                | 2.194163  | 0.000001  |
| 12            | 7             | 0           | -3.445972               | -1.446318 | -0.000002 |
| 13            | 1             | 0           | -3.792025               | -0.946487 | 0.816120  |
| 14            | 1             | 0           | -3.792019               | -0.946485 | -0.816124 |
| 15            | 1             | 0           | -1.579688               | -2.288103 | -0.000000 |
| 16            | 1             | 0           | 3.603446                | -2.082178 | -0.000009 |
| 17            | 1             | 0           | 4.168431                | -0.646558 | 0.890471  |
| 18            | 1             | 0           | 4.168437                | -0.646543 | -0.890462 |
| 19            | 1             | 0           | 1.163550                | -2.270705 | -0.000003 |
| 20            | 1             | 0           | -1.798289               | 2.975704  | -0.000002 |

**Table S4:** Cartesian coordinates and energies of the optimized geometry of the *s-trans*-conformer of **9**.

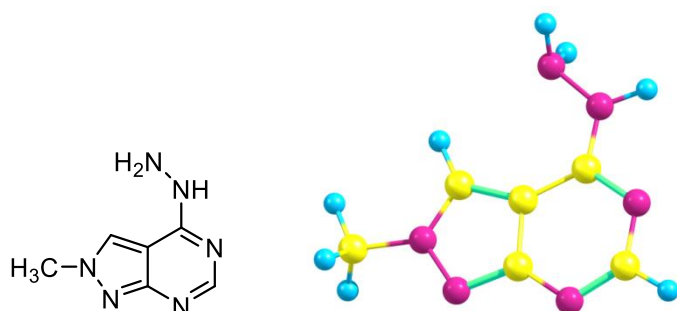

|                                               |                             |
|-----------------------------------------------|-----------------------------|
| Electronic Energy =                           | -562.092165994 a.u.         |
| Zero-point correction =                       | 0.156247 (Hartree/Particle) |
| Thermal correction to Energy =                | 0.166504                    |
| Thermal correction to Enthalpy =              | 0.167448                    |
| Thermal correction to Gibbs Free Energy =     | 0.120212                    |
| Sum of electronic and zero-point Energies =   | -561.935919                 |
| Sum of electronic and thermal Energies =      | -561.925662                 |
| Sum of electronic and thermal Enthalpies =    | -561.924718                 |
| Sum of electronic and thermal Free Energies = | -561.971954                 |

Standard orientation:

| Center Number | Atomic Number | Atomic Type | Coordinates (Angstroms) |           |           |
|---------------|---------------|-------------|-------------------------|-----------|-----------|
|               |               |             | X                       | Y         | Z         |
| 1             | 6             | 0           | -3.464035               | 0.867026  | 0.000006  |
| 2             | 7             | 0           | -2.103467               | 0.346325  | -0.000007 |
| 3             | 6             | 0           | -0.967949               | 1.063548  | -0.000048 |
| 4             | 6             | 0           | 0.074471                | 0.133470  | -0.000052 |
| 5             | 6             | 0           | -0.579003               | -1.136666 | -0.000001 |
| 6             | 7             | 0           | -1.912042               | -0.998219 | 0.000022  |
| 7             | 6             | 0           | 1.497470                | 0.114205  | -0.000048 |
| 8             | 7             | 0           | 2.271111                | 1.220868  | -0.000155 |
| 9             | 7             | 0           | 2.133678                | -1.063971 | 0.000010  |
| 10            | 6             | 0           | 1.391828                | -2.194858 | 0.000033  |
| 11            | 7             | 0           | 0.079687                | -2.328644 | 0.000030  |
| 12            | 7             | 0           | 1.720813                | 2.508474  | 0.000106  |
| 13            | 1             | 0           | 2.036982                | 3.012034  | 0.824198  |
| 14            | 1             | 0           | 2.037152                | 3.012404  | -0.823689 |
| 15            | 1             | 0           | -3.421912               | 1.954132  | -0.000035 |
| 16            | 1             | 0           | -3.988149               | 0.518821  | 0.890273  |
| 17            | 1             | 0           | -3.988190               | 0.518753  | -0.890209 |
| 18            | 1             | 0           | -0.966975               | 2.139169  | -0.000068 |
| 19            | 1             | 0           | 3.275233                | 1.085618  | 0.000079  |
| 20            | 1             | 0           | 1.970695                | -3.115110 | 0.000067  |

**Table S5:** Cartesian coordinates and energies of the optimized geometry of the tautomer of **9** (Z-isomer).

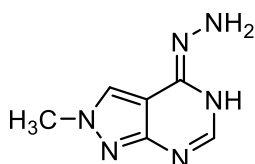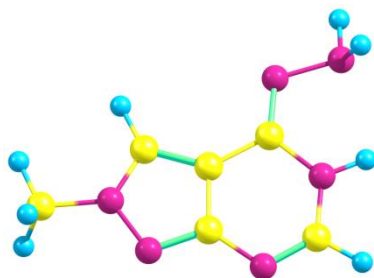

|                                               |                             |
|-----------------------------------------------|-----------------------------|
| Electronic Energy =                           | -562.086372220 a.u.         |
| Zero-point correction =                       | 0.156180 (Hartree/Particle) |
| Thermal correction to Energy =                | 0.166420                    |
| Thermal correction to Enthalpy =              | 0.167364                    |
| Thermal correction to Gibbs Free Energy =     | 0.120204                    |
| Sum of electronic and zero-point Energies =   | -561.930192                 |
| Sum of electronic and thermal Energies =      | -561.919953                 |
| Sum of electronic and thermal Enthalpies =    | -561.919008                 |
| Sum of electronic and thermal Free Energies = | -561.966168                 |

Standard orientation:

| Center Number | Atomic Number | Atomic Type | Coordinates (Angstroms) |           |           |
|---------------|---------------|-------------|-------------------------|-----------|-----------|
|               |               |             | X                       | Y         | Z         |
| 1             | 6             | 0           | 3.683026                | -0.936990 | 0.012080  |
| 2             | 7             | 0           | 2.308505                | -0.456556 | 0.004749  |
| 3             | 6             | 0           | 1.182250                | -1.203774 | -0.010430 |
| 4             | 6             | 0           | 0.123670                | -0.308930 | -0.013013 |
| 5             | 6             | 0           | 0.736182                | 0.971178  | 0.003726  |
| 6             | 7             | 0           | 2.067707                | 0.876529  | 0.014100  |
| 7             | 6             | 0           | -1.316699               | -0.411011 | -0.020737 |
| 8             | 7             | 0           | -1.972716               | -1.521698 | -0.032268 |
| 9             | 7             | 0           | -1.920543               | 0.854437  | -0.008842 |
| 10            | 6             | 0           | -1.234275               | 2.041053  | -0.012674 |
| 11            | 7             | 0           | 0.052642                | 2.173108  | 0.004284  |
| 12            | 7             | 0           | -3.397791               | -1.335045 | -0.028477 |
| 13            | 1             | 0           | 3.671091                | -2.025013 | 0.006047  |
| 14            | 1             | 0           | 4.192793                | -0.582004 | 0.908258  |
| 15            | 1             | 0           | 4.205825                | -0.572485 | -0.872725 |
| 16            | 1             | 0           | 1.215692                | -2.280817 | -0.015826 |
| 17            | 1             | 0           | -2.929609               | 0.868855  | -0.096538 |
| 18            | 1             | 0           | -1.864555               | 2.923944  | -0.026270 |
| 19            | 1             | 0           | -3.795381               | -2.239769 | -0.257133 |
| 20            | 1             | 0           | -3.705404               | -1.137292 | 0.925650  |



**Table S6:** Cartesian coordinates and energies of the optimized geometry of the tautomer of **9** (*E*-isomer).

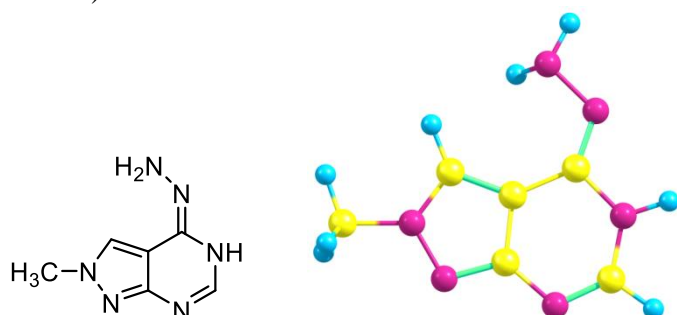

|                                               |                             |
|-----------------------------------------------|-----------------------------|
| Electronic Energy =                           | -562.085705132 a.u.         |
| Zero-point correction =                       | 0.156372 (Hartree/Particle) |
| Thermal correction to Energy =                | 0.166494                    |
| Thermal correction to Enthalpy =              | 0.167438                    |
| Thermal correction to Gibbs Free Energy =     | 0.120683                    |
| Sum of electronic and zero-point Energies =   | -561.929333                 |
| Sum of electronic and thermal Energies =      | -561.919211                 |
| Sum of electronic and thermal Enthalpies =    | -561.918267                 |
| Sum of electronic and thermal Free Energies = | -561.965023                 |

Standard orientation:

| Center Number | Atomic Number | Atomic Type | Coordinates (Angstroms) |           |           |
|---------------|---------------|-------------|-------------------------|-----------|-----------|
|               |               |             | X                       | Y         | Z         |
| 1             | 6             | 0           | -3.516963               | 0.680694  | 0.026044  |
| 2             | 7             | 0           | -2.125531               | 0.253737  | 0.009123  |
| 3             | 6             | 0           | -1.028777               | 1.039977  | 0.023537  |
| 4             | 6             | 0           | 0.068691                | 0.185518  | -0.002888 |
| 5             | 6             | 0           | -0.503335               | -1.120311 | -0.027126 |
| 6             | 7             | 0           | -1.834210               | -1.071661 | -0.021451 |
| 7             | 6             | 0           | 1.508185                | 0.327713  | 0.022768  |
| 8             | 7             | 0           | 2.268886                | 1.364382  | 0.035989  |
| 9             | 7             | 0           | 2.146033                | -0.929970 | 0.035310  |
| 10            | 6             | 0           | 1.499825                | -2.127908 | -0.003974 |
| 11            | 7             | 0           | 0.214656                | -2.300533 | -0.039649 |
| 12            | 7             | 0           | 1.606036                | 2.612957  | 0.039089  |
| 13            | 1             | 0           | 3.157279                | -0.923131 | 0.054411  |
| 14            | 1             | 0           | 2.322115                | 3.318378  | -0.091440 |
| 15            | 1             | 0           | 0.966148                | 2.697057  | -0.752016 |
| 16            | 1             | 0           | -3.547659               | 1.768068  | 0.054126  |
| 17            | 1             | 0           | -4.015626               | 0.278420  | 0.908514  |
| 18            | 1             | 0           | -4.023041               | 0.324306  | -0.871826 |
| 19            | 1             | 0           | -1.111328               | 2.112652  | 0.062835  |
| 20            | 1             | 0           | 2.155264                | -2.992234 | -0.003654 |

**Table S7.** Relative electronic ( $\Delta E$ , kcal/mol) and Gibbs free energies ( $\Delta G$ , kcal/mol) of pyrazolopyrimidines **8**, **9**, and tautomers of **9** in DMSO solution.<sup>a</sup>

| Compound                                 | $\Delta E$ | $\Delta G$ |
|------------------------------------------|------------|------------|
| ( <i>Z</i> )- <b>8</b>                   | 6.50       | 7.17       |
| ( <i>E</i> )- <b>8</b>                   | 4.76       | 5.24       |
| <i>s-cis</i> -conformer of <b>9</b>      | 0.56       | 0.00       |
| <i>s-trans</i> -conformer of <b>9</b>    | 0.00       | 0.29       |
| tautomer of <b>9</b> ( <i>Z</i> -isomer) | 3.64       | 3.92       |
| tautomer of <b>9</b> ( <i>E</i> -isomer) | 4.05       | 4.64       |

<sup>a</sup> Calculated using data of Tables S1-S6.

**Table S8.** Experimental <sup>13</sup>C chemical shifts (in DMSO-*d*<sub>6</sub>) for the product of the reaction of imidate **4** with N<sub>2</sub>H<sub>4</sub>·H<sub>2</sub>O in EtOH and calculated <sup>13</sup>C chemical shifts for (*E*)- and (*Z*)-**8**, *s-cis*- and *s-trans*-conformers of **9** in DMSO solution.<sup>a</sup>

| <sup>13</sup> C assignment | Calculated shift, ppm                                                                                         |                                                                                                               |                                                                                                                             |                                                                                                                                | Observed shift, ppm |
|----------------------------|---------------------------------------------------------------------------------------------------------------|---------------------------------------------------------------------------------------------------------------|-----------------------------------------------------------------------------------------------------------------------------|--------------------------------------------------------------------------------------------------------------------------------|---------------------|
|                            | 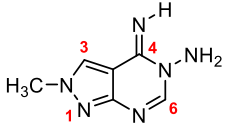<br>( <i>Z</i> )- <b>8</b> | <br>( <i>E</i> )- <b>8</b> | <br><b>9</b><br><i>s-cis</i> -conformer | <br><b>9</b><br><i>s-trans</i> -conformer |                     |
| C(7a)                      | 156.6                                                                                                         | 156.8                                                                                                         | 160.9                                                                                                                       | 162.1                                                                                                                          | 155.0               |
| C(4)                       | 152.1                                                                                                         | 157.2                                                                                                         | 158.9                                                                                                                       | 160.9                                                                                                                          | 151.8               |
| C(6)                       | 151.9                                                                                                         | 152.1                                                                                                         | 157.4                                                                                                                       | 157.1                                                                                                                          | 149.9               |
| C(3)                       | 128.3                                                                                                         | 127.9                                                                                                         | 123.3                                                                                                                       | 128.8                                                                                                                          | 128.4               |
| C(3a)                      | 105.6                                                                                                         | 104.1                                                                                                         | 98.4                                                                                                                        | 98.3                                                                                                                           | 105.4               |

<sup>a</sup> Calculations were performed for sp<sup>2</sup>-atoms by the GIAO method at the PBE1PBE/6-311+G(2d,p) level of theory using the DFT B3LYP/6-311++G(d,p) optimized geometries (DMSO solution) and applying a multi-standard approach (C<sub>6</sub>H<sub>6</sub> as a standard;  $\delta_{\text{calc}} = 182.4059 - \delta_{\text{abs}}$ , in ppm).

## Macrocycle 5

**Table S9:** Cartesian coordinates and energies of the optimized geometry of macrocycle 5.

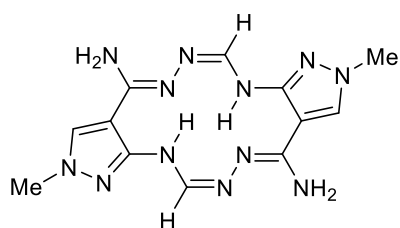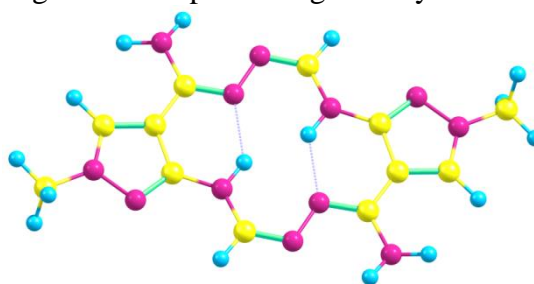

|                                               |                             |
|-----------------------------------------------|-----------------------------|
| Electronic Energy =                           | -1124.19783035 a.u.         |
| Zero-point correction =                       | 0.312391 (Hartree/Particle) |
| Thermal correction to Energy =                | 0.334428                    |
| Thermal correction to Enthalpy =              | 0.335372                    |
| Thermal correction to Gibbs Free Energy =     | 0.260484                    |
| Sum of electronic and zero-point Energies =   | -1123.885439                |
| Sum of electronic and thermal Energies =      | -1123.863402                |
| Sum of electronic and thermal Enthalpies =    | -1123.862458                |
| Sum of electronic and thermal Free Energies = | -1123.937347                |

### Standard orientation:

| Center Number | Atomic Number | Atomic Type | Coordinates (Angstroms) |           |           |
|---------------|---------------|-------------|-------------------------|-----------|-----------|
|               |               |             | X                       | Y         | Z         |
| 1             | 7             | 0           | 0.980495                | -1.603095 | 0.017727  |
| 2             | 6             | 0           | 2.259932                | -1.883020 | -0.008959 |
| 3             | 7             | 0           | 2.750144                | -3.158694 | 0.015280  |
| 4             | 6             | 0           | 3.195414                | -0.759746 | -0.011109 |
| 5             | 7             | 0           | 0.137247                | -2.715127 | -0.002910 |
| 6             | 6             | 0           | -1.118689               | -2.389281 | 0.027152  |
| 7             | 7             | 0           | -1.575840               | -1.106658 | 0.084893  |
| 8             | 6             | 0           | -2.870386               | -0.633070 | 0.045526  |
| 9             | 6             | 0           | 2.870387                | 0.633070  | -0.045509 |
| 10            | 7             | 0           | 1.575841                | 1.106658  | -0.084875 |
| 11            | 6             | 0           | 1.118689                | 2.389281  | -0.027173 |
| 12            | 7             | 0           | -0.137248               | 2.715128  | 0.002880  |
| 13            | 7             | 0           | -0.980495               | 1.603095  | -0.017722 |
| 14            | 6             | 0           | -2.259931               | 1.883020  | 0.008932  |
| 15            | 6             | 0           | -3.195415               | 0.759746  | 0.011107  |
| 16            | 7             | 0           | -3.953391               | -1.400020 | 0.032612  |
| 17            | 7             | 0           | -4.995682               | -0.521096 | -0.013502 |
| 18            | 6             | 0           | -4.587289               | 0.759758  | -0.029059 |
| 19            | 6             | 0           | -6.358313               | -1.025641 | -0.043609 |
| 20            | 7             | 0           | 3.953392                | 1.400019  | -0.032583 |
| 21            | 7             | 0           | 4.995683                | 0.521095  | 0.013518  |
| 22            | 6             | 0           | 4.587289                | -0.759760 | 0.029063  |
| 23            | 6             | 0           | 6.358312                | 1.025640  | 0.043687  |
| 24            | 1             | 0           | 3.678090                | -3.339259 | -0.333343 |
| 25            | 1             | 0           | 2.064124                | -3.883290 | -0.146548 |
| 26            | 1             | 0           | -0.894081               | -0.350053 | 0.079181  |
| 27            | 1             | 0           | 0.894082                | 0.350052  | -0.079156 |
| 28            | 1             | 0           | -1.856982               | -3.181994 | 0.005178  |
| 29            | 1             | 0           | 1.856981                | 3.181997  | -0.005223 |
| 30            | 1             | 0           | -5.299543               | 1.568048  | -0.075313 |
| 31            | 1             | 0           | -6.556783               | -1.615607 | 0.852417  |
| 32            | 1             | 0           | -7.041115               | -0.178793 | -0.078329 |
| 33            | 1             | 0           | -6.505884               | -1.648003 | -0.927454 |
| 34            | 1             | 0           | 5.299541                | -1.568051 | 0.075312  |
| 35            | 1             | 0           | 6.556770                | 1.615726  | -0.852262 |
| 36            | 1             | 0           | 7.041117                | 0.178789  | 0.078284  |
| 37            | 1             | 0           | 6.505892                | 1.647884  | 0.927614  |
| 38            | 7             | 0           | -2.750144               | 3.158695  | -0.015369 |
| 39            | 1             | 0           | -2.064127               | 3.883294  | 0.146457  |
| 40            | 1             | 0           | -3.678094               | 3.339272  | 0.333240  |

**Table S10.** Experimental and calculated  $^{13}\text{C}$  chemical shifts for macrocycle **5** in DMSO solution.<sup>a</sup>

| $^{13}\text{C}$<br>assignment | 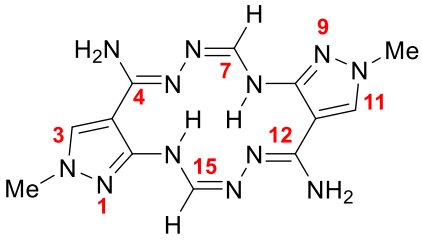 |                     |
|-------------------------------|-----------------------------------------------------------------------------------|---------------------|
|                               | Calculated shift, ppm                                                             | Observed shift, ppm |
| C4 and C12                    | 152.8                                                                             | 152.3               |
| C8a and C16a                  | 148.6                                                                             | 147.6               |
| C7 and C15                    | 138.1                                                                             | 138.2               |
| C3 and C11                    | 129.2                                                                             | 130.7               |
| C3a and C11a                  | 99.6                                                                              | 100.5               |

<sup>a</sup> Calculations were performed for  $\text{sp}^2$ -atoms by the GIAO method at the PBE1PBE/6-311+G(2d,p) level of theory using the DFT B3LYP/6-311++G(d,p) optimized geometries (DMSO solution) and applying a multi-standard approach ( $\text{C}_6\text{H}_6$  as a standard;  $\delta_{\text{calc}} = 182.4059 - \delta_{\text{abs}}$ , in ppm).

### Bis-pyrazole **6**

**Table S11:** Cartesian coordinates and energies of the optimized geometry of bis-pyrazole **6**.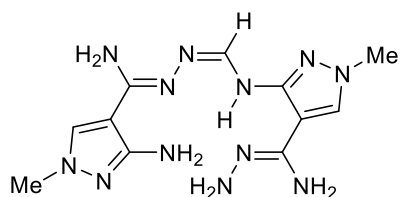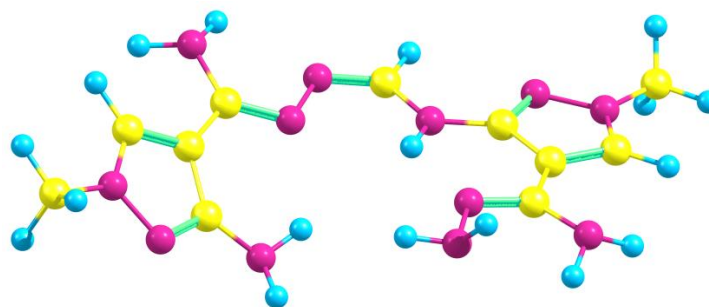

|                                               |                             |
|-----------------------------------------------|-----------------------------|
| Electronic Energy =                           | -1087.29434685 a.u.         |
| Zero-point correction =                       | 0.328355 (Hartree/Particle) |
| Thermal correction to Energy =                | 0.351721                    |
| Thermal correction to Enthalpy =              | 0.352665                    |
| Thermal correction to Gibbs Free Energy =     | 0.273354                    |
| Sum of electronic and zero-point Energies =   | -1086.965991                |
| Sum of electronic and thermal Energies =      | -1086.942626                |
| Sum of electronic and thermal Enthalpies =    | -1086.941682                |
| Sum of electronic and thermal Free Energies = | -1087.020993                |

Standard orientation:

| Center Number | Atomic Number | Atomic Type | Coordinates (Angstroms) |           |           |
|---------------|---------------|-------------|-------------------------|-----------|-----------|
|               |               |             | X                       | Y         | Z         |
| 1             | 7             | 0           | -5.276614               | 0.544039  | -0.150312 |
| 2             | 6             | 0           | -4.697822               | -0.609782 | -0.516996 |
| 3             | 6             | 0           | -3.407231               | -0.619049 | 0.009105  |
| 4             | 6             | 0           | -3.311904               | 0.627624  | 0.701218  |
| 5             | 7             | 0           | -4.442550               | 1.324653  | 0.600388  |
| 6             | 6             | 0           | -6.607070               | 1.023887  | -0.478327 |
| 7             | 7             | 0           | -2.246032               | 1.070663  | 1.458057  |
| 8             | 6             | 0           | -2.389142               | -1.651529 | -0.115300 |
| 9             | 7             | 0           | -2.776697               | -2.887315 | -0.572517 |
| 10            | 7             | 0           | -1.147034               | -1.346969 | 0.165031  |
| 11            | 7             | 0           | -0.292473               | -2.450147 | 0.110599  |
| 12            | 6             | 0           | 0.962830                | -2.147334 | 0.083662  |
| 13            | 7             | 0           | 1.486031                | -0.885561 | 0.039721  |
| 14            | 6             | 0           | 2.837895                | -0.590643 | 0.017701  |
| 15            | 6             | 0           | 3.393261                | 0.717201  | -0.098000 |
| 16            | 6             | 0           | 4.765836                | 0.488385  | -0.078549 |
| 17            | 7             | 0           | 4.955814                | -0.837938 | 0.043711  |
| 18            | 7             | 0           | 3.781882                | -1.523553 | 0.107498  |
| 19            | 6             | 0           | 2.670716                | 1.980624  | -0.214568 |
| 20            | 7             | 0           | 3.399499                | 3.155086  | -0.303541 |
| 21            | 7             | 0           | 1.376986                | 1.943316  | -0.289914 |
| 22            | 7             | 0           | 0.754689                | 3.215188  | -0.388046 |
| 23            | 6             | 0           | 6.214531                | -1.560755 | 0.112968  |
| 24            | 1             | 0           | -1.367120               | 0.643975  | 1.189885  |
| 25            | 1             | 0           | -2.067851               | -3.603375 | -0.477288 |
| 26            | 1             | 0           | -3.722503               | -3.183191 | -0.384550 |
| 27            | 1             | 0           | 0.867020                | -0.081739 | -0.039026 |
| 28            | 1             | 0           | 4.338759                | 3.131196  | 0.066399  |
| 29            | 1             | 0           | 2.890475                | 3.982126  | -0.013921 |
| 30            | 1             | 0           | 1.064343                | 3.706906  | -1.228651 |
| 31            | 1             | 0           | -0.237711               | 3.044067  | -0.502004 |
| 32            | 1             | 0           | -5.217123               | -1.327438 | -1.132293 |
| 33            | 1             | 0           | -7.117397               | 0.262208  | -1.065314 |
| 34            | 1             | 0           | -6.541542               | 1.945608  | -1.059379 |
| 35            | 1             | 0           | -7.171208               | 1.214147  | 0.436248  |
| 36            | 1             | 0           | -2.205560               | 2.070979  | 1.596902  |
| 37            | 1             | 0           | 1.680704                | -2.958603 | 0.093010  |
| 38            | 1             | 0           | 5.601908                | 1.165389  | -0.152486 |
| 39            | 1             | 0           | 7.031362                | -0.844711 | 0.043757  |
| 40            | 1             | 0           | 6.283428                | -2.270375 | -0.712972 |
| 41            | 1             | 0           | 6.284113                | -2.099173 | 1.059472  |

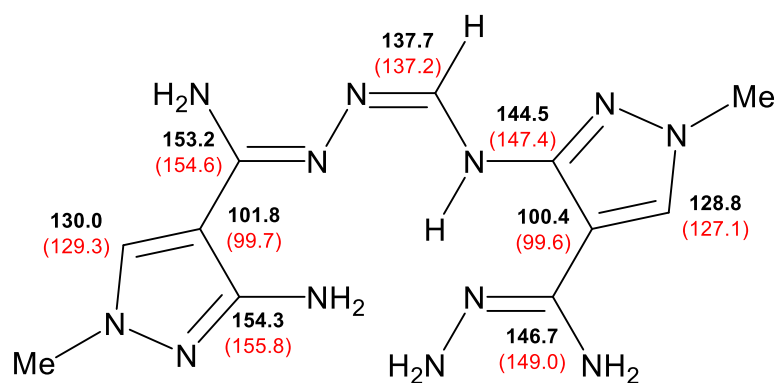

**Figure S1.** Experimental and calculated (numbers in red)  $^{13}\text{C}$  chemical shifts for bis-pyrazole **6** in DMSO solution. Calculations were performed for  $\text{sp}^2$ -atoms by the GIAO method at the PBE1PBE/6-311+G(2d,p) level of theory using the DFT B3LYP/6-311++G(d,p) optimized geometries (DMSO solution) and applying a multi-standard approach ( $\text{C}_6\text{H}_6$  as a standard;  $\delta_{\text{calc}} = 182.4059 - \delta_{\text{abs}}$ , in ppm).

## Pyrazolyl-1,2,4-triazole 10

**Table S12:** Cartesian coordinates and energies of the optimized geometry of pyrazolyl-1,2,4-triazole **10** (*s-cis*-conformer).

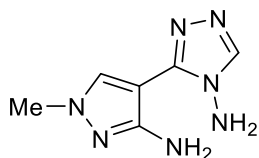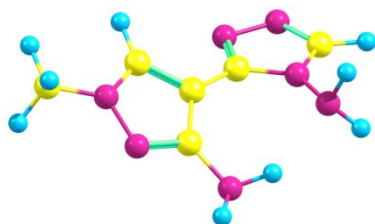

|                                               |                             |
|-----------------------------------------------|-----------------------------|
| Electronic Energy =                           | -617.442098364 a.u.         |
| Zero-point correction =                       | 0.172449 (Hartree/Particle) |
| Thermal correction to Energy =                | 0.183981                    |
| Thermal correction to Enthalpy =              | 0.184925                    |
| Thermal correction to Gibbs Free Energy =     | 0.134642                    |
| Sum of electronic and zero-point Energies =   | -617.269650                 |
| Sum of electronic and thermal Energies =      | -617.258118                 |
| Sum of electronic and thermal Enthalpies =    | -617.257173                 |
| Sum of electronic and thermal Free Energies = | -617.307457                 |

Standard orientation:

| Center<br>Number | Atomic<br>Number | Atomic<br>Type | Coordinates (Angstroms) |           |           |
|------------------|------------------|----------------|-------------------------|-----------|-----------|
|                  |                  |                | X                       | Y         | Z         |
| 1                | 6                | 0              | 0.376671                | -0.160068 | -0.031299 |
| 2                | 6                | 0              | 1.095204                | 1.051605  | -0.273276 |
| 3                | 7                | 0              | 2.409816                | 0.853740  | -0.175964 |
| 4                | 7                | 0              | 2.557063                | -0.471573 | 0.111488  |
| 5                | 6                | 0              | 1.377268                | -1.099714 | 0.207965  |
| 6                | 6                | 0              | -1.035498               | -0.487462 | -0.099593 |
| 7                | 7                | 0              | -1.508136               | -1.672640 | -0.448753 |
| 8                | 7                | 0              | -2.886950               | -1.637329 | -0.340783 |
| 9                | 6                | 0              | -3.216866               | -0.442425 | 0.066814  |
| 10               | 7                | 0              | -2.095733               | 0.325765  | 0.231254  |
| 11               | 6                | 0              | 3.886220                | -1.022070 | 0.311682  |
| 12               | 7                | 0              | 0.584120                | 2.282246  | -0.654507 |
| 13               | 7                | 0              | -2.014169               | 1.647017  | 0.701553  |
| 14               | 1                | 0              | 1.302691                | -2.149854 | 0.439622  |
| 15               | 1                | 0              | -4.214304               | -0.071979 | 0.245775  |
| 16               | 1                | 0              | 4.492319                | -0.861499 | -0.581149 |
| 17               | 1                | 0              | 4.367696                | -0.542686 | 1.165881  |
| 18               | 1                | 0              | 3.795694                | -2.090367 | 0.499863  |
| 19               | 1                | 0              | 1.260213                | 3.031597  | -0.576945 |
| 20               | 1                | 0              | -0.293348               | 2.498526  | -0.190574 |
| 21               | 1                | 0              | -2.726331               | 2.200603  | 0.233072  |
| 22               | 1                | 0              | -2.204711               | 1.655881  | 1.700676  |

**Table S13:** Cartesian coordinates and energies of the optimized geometry of pyrazolyl-1,2,4-triazole **10** (*s-trans*-conformer).

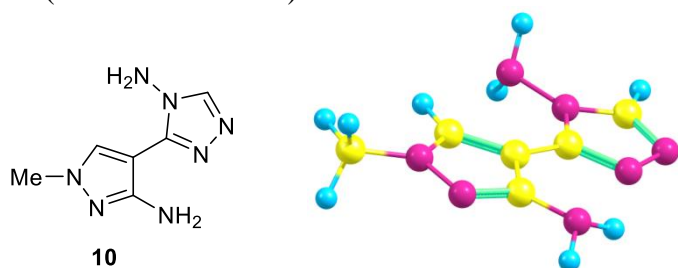

|                                               |                             |
|-----------------------------------------------|-----------------------------|
| Electronic Energy =                           | -617.445188385 a.u.         |
| Zero-point correction =                       | 0.172005 (Hartree/Particle) |
| Thermal correction to Energy =                | 0.183743                    |
| Thermal correction to Enthalp =               | 0.184687                    |
| Thermal correction to Gibbs Free Energy =     | 0.133994                    |
| Sum of electronic and zero-point Energies =   | -617.273184                 |
| Sum of electronic and thermal Energies =      | -617.261446                 |
| Sum of electronic and thermal Enthalpies =    | -617.260501                 |
| Sum of electronic and thermal Free Energies = | -617.311194                 |

Standard orientation:

| Center Number | Atomic Number | Atomic Type | Coordinates (Angstroms) |           |           |
|---------------|---------------|-------------|-------------------------|-----------|-----------|
|               |               |             | X                       | Y         | Z         |
| 1             | 6             | 0           | 3.691856                | -1.290398 | -0.048904 |
| 2             | 7             | 0           | 2.452919                | -0.533724 | -0.017235 |
| 3             | 6             | 0           | 1.197424                | -1.006195 | -0.008070 |
| 4             | 6             | 0           | 0.341244                | 0.093811  | 0.022779  |
| 5             | 6             | 0           | 1.223749                | 1.219076  | 0.033561  |
| 6             | 7             | 0           | 2.497452                | 0.832038  | 0.007811  |
| 7             | 7             | 0           | 0.864433                | 2.548461  | 0.125782  |
| 8             | 6             | 0           | -1.098691               | 0.165480  | 0.002819  |
| 9             | 7             | 0           | -1.977324               | -0.891862 | 0.015814  |
| 10            | 6             | 0           | -3.227668               | -0.332004 | -0.026629 |
| 11            | 7             | 0           | -3.140104               | 0.968925  | -0.062669 |
| 12            | 7             | 0           | -1.793355               | 1.292763  | -0.043532 |
| 13            | 7             | 0           | -1.622745               | -2.247832 | 0.063037  |
| 14            | 1             | 0           | 1.537674                | 3.202910  | -0.248211 |
| 15            | 1             | 0           | -0.096073               | 2.732735  | -0.138980 |
| 16            | 1             | 0           | -1.996610               | -2.716275 | -0.757511 |
| 17            | 1             | 0           | -2.030098               | -2.667076 | 0.894115  |
| 18            | 1             | 0           | 3.451124                | -2.351798 | -0.068049 |
| 19            | 1             | 0           | 4.288235                | -1.070043 | 0.838140  |
| 20            | 1             | 0           | 4.264677                | -1.032367 | -0.941304 |
| 21            | 1             | 0           | 0.977621                | -2.059274 | -0.027257 |
| 22            | 1             | 0           | -4.132961               | -0.918815 | -0.027343 |

**Comment:** *s-trans*-conformer of **10** is more stable than *s-cis*-conformer of **10** ( $\Delta E = 1.94$  kcal/mol,  $\Delta G = 2.35$  kcal/mol in DMSO)

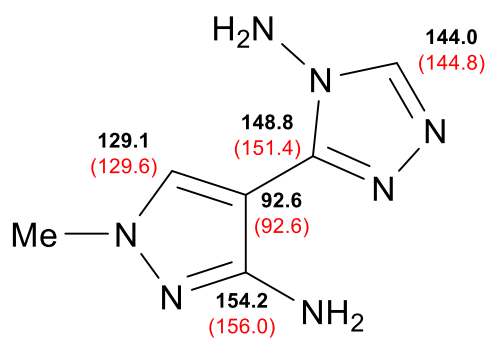

**Figure S2.** Experimental and calculated (numbers in red)  $^{13}\text{C}$  chemical shifts for pyrazolyl-1,2,4-triazole **10** in DMSO solution. Calculations were performed for  $\text{sp}^2$ -atoms by the GIAO method at the PBE1PBE/6-311+G(2d,p) level of theory using the DFT B3LYP/6-311++G(d,p) optimized geometries (DMSO solution) and applying a multi-standard approach ( $\text{C}_6\text{H}_6$  as a standard;  $\delta_{\text{calc}} = 182.4059 - \delta_{\text{abs}}$ , in ppm).

Calculation of thermodynamic parameters for the hydrazine promoted transformation of pyrazolopyrimidine **8** into macrocycle **5** in MeOH solution

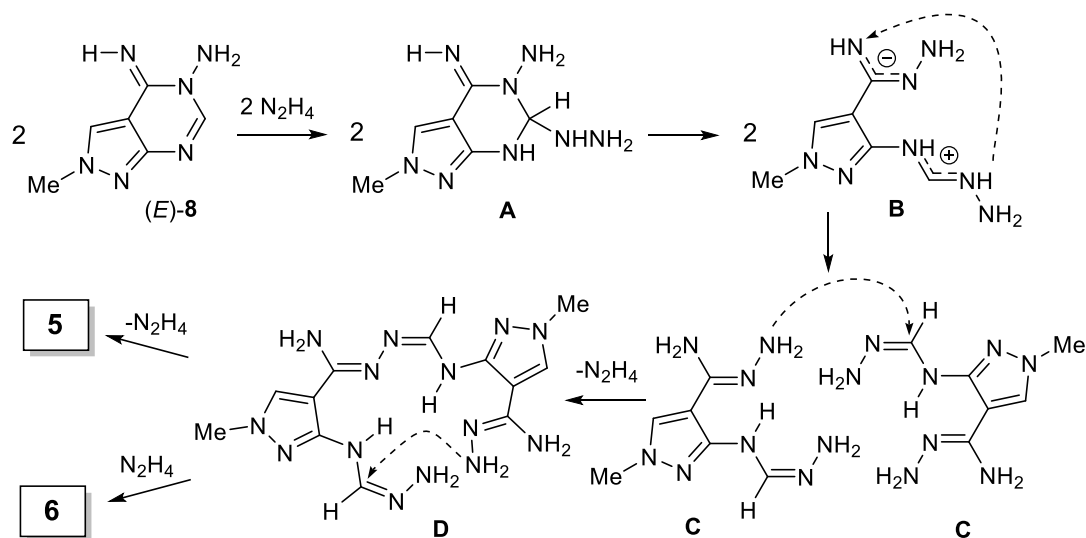



## Starting compound: Pyrazolopyrimidine 8

**Table S14:** Cartesian coordinates and energies of the optimized geometry of (Z)-8.

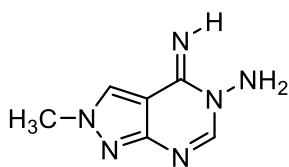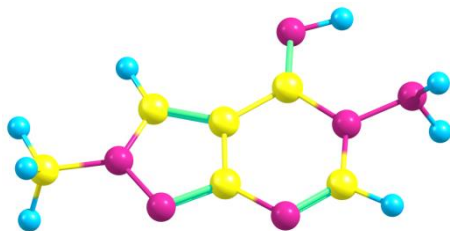

|                                              |                             |
|----------------------------------------------|-----------------------------|
| Electronic Energy =                          | -562.081453421 a.u.         |
| Zero-point correction=                       | 0.156277 (Hartree/Particle) |
| Thermal correction to Energy=                | 0.166277                    |
| Thermal correction to Enthalpy=              | 0.167222                    |
| Thermal correction to Gibbs Free Energy=     | 0.120809                    |
| Sum of electronic and zero-point Energies=   | -561.925177                 |
| Sum of electronic and thermal Energies=      | -561.915176                 |
| Sum of electronic and thermal Enthalpies=    | -561.914232                 |
| Sum of electronic and thermal Free Energies= | -561.960645                 |

### Standard orientation:

| Center Number | Atomic Number | Atomic Type | Coordinates (Angstroms) |           |           |
|---------------|---------------|-------------|-------------------------|-----------|-----------|
|               |               |             | X                       | Y         | Z         |
| 1             | 6             | 0           | 3.843459                | 0.277455  | -0.000003 |
| 2             | 7             | 0           | 2.395084                | 0.124750  | 0.000003  |
| 3             | 6             | 0           | 1.470539                | 1.108649  | 0.000005  |
| 4             | 6             | 0           | 0.234331                | 0.479097  | 0.000004  |
| 5             | 6             | 0           | 0.538909                | -0.904041 | 0.000001  |
| 6             | 7             | 0           | 1.856228                | -1.119025 | 0.000004  |
| 7             | 6             | 0           | -1.134452               | 0.945607  | 0.000002  |
| 8             | 7             | 0           | -1.499890               | 2.172722  | 0.000001  |
| 9             | 7             | 0           | -2.033972               | -0.162885 | -0.000002 |
| 10            | 6             | 0           | -1.624112               | -1.481779 | -0.000002 |
| 11            | 7             | 0           | -0.405515               | -1.910449 | -0.000002 |
| 12            | 7             | 0           | -3.406692               | 0.149232  | -0.000007 |
| 13            | 1             | 0           | -3.849763               | -0.232048 | 0.830048  |
| 14            | 1             | 0           | -3.849764               | -0.232075 | -0.830050 |
| 15            | 1             | 0           | 4.081198                | 1.339162  | 0.000008  |
| 16            | 1             | 0           | 4.262883                | -0.191417 | -0.890541 |
| 17            | 1             | 0           | 4.262892                | -0.191438 | 0.890519  |
| 18            | 1             | 0           | 1.747835                | 2.150045  | 0.000007  |
| 19            | 1             | 0           | -2.519718               | 2.220593  | -0.000003 |
| 20            | 1             | 0           | -2.444315               | -2.193165 | -0.000007 |

**Table S15:** Cartesian coordinates and energies of the optimized geometry of (*E*)-8.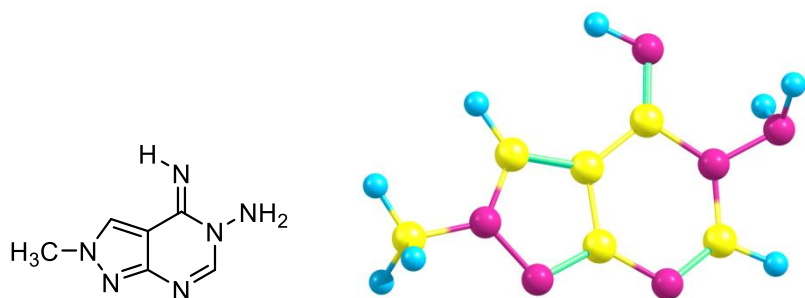

|                                               |                             |
|-----------------------------------------------|-----------------------------|
| Electronic Energy =                           | -562.084277499 a.u.         |
| Zero-point correction =                       | 0.156215 (Hartree/Particle) |
| Thermal correction to Energy =                | 0.166345                    |
| Thermal correction to Enthalpy =              | 0.167289                    |
| Thermal correction to Gibbs Free Energy =     | 0.120520                    |
| Sum of electronic and zero-point Energies =   | -561.928062                 |
| Sum of electronic and thermal Energies =      | -561.917933                 |
| Sum of electronic and thermal Enthalpies =    | -561.916988                 |
| Sum of electronic and thermal Free Energies = | -561.963758                 |

## Standard orientation:

| Center Number | Atomic Number | Atomic Type | Coordinates (Angstroms) |           |           |
|---------------|---------------|-------------|-------------------------|-----------|-----------|
|               |               |             | X                       | Y         | Z         |
| 1             | 6             | 0           | -3.829930               | 0.294115  | 0.000001  |
| 2             | 7             | 0           | -2.382404               | 0.130735  | 0.000000  |
| 3             | 6             | 0           | -1.452256               | 1.107224  | -0.000003 |
| 4             | 6             | 0           | -0.218594               | 0.468070  | -0.000004 |
| 5             | 6             | 0           | -0.534677               | -0.915146 | -0.000000 |
| 6             | 7             | 0           | -1.853867               | -1.117519 | 0.000003  |
| 7             | 6             | 0           | 1.157794                | 0.912190  | 0.000000  |
| 8             | 7             | 0           | 1.665803                | 2.092519  | 0.000004  |
| 9             | 7             | 0           | 2.039180                | -0.197596 | -0.000002 |
| 10            | 6             | 0           | 1.624068                | -1.508193 | 0.000000  |
| 11            | 7             | 0           | 0.400108                | -1.927328 | 0.000001  |
| 12            | 7             | 0           | 3.434322                | 0.010652  | -0.000001 |
| 13            | 1             | 0           | 3.657799                | 0.583452  | 0.812050  |
| 14            | 1             | 0           | 3.657800                | 0.583456  | -0.812048 |
| 15            | 1             | 0           | 0.928139                | 2.793275  | 0.000003  |
| 16            | 1             | 0           | -4.060385               | 1.357357  | -0.000001 |
| 17            | 1             | 0           | -4.251772               | -0.172305 | 0.890560  |
| 18            | 1             | 0           | -4.251773               | -0.172308 | -0.890557 |
| 19            | 1             | 0           | -1.727991               | 2.149660  | -0.000006 |
| 20            | 1             | 0           | 2.447764                | -2.212386 | -0.000001 |

## Final compound: Macrocycle 5

**Table S16:** Cartesian coordinates and energies of the optimized geometry of macrocycle 5.

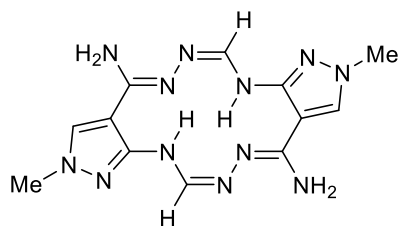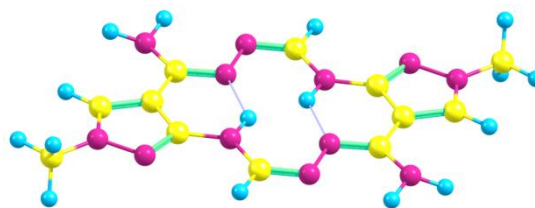

|                                               |                             |
|-----------------------------------------------|-----------------------------|
| Electronic Energy =                           | -1124.19739243 a.u.         |
| Zero-point correction =                       | 0.312403 (Hartree/Particle) |
| Thermal correction to Energy =                | 0.334442                    |
| Thermal correction to Enthalpy =              | 0.335386                    |
| Thermal correction to Gibbs Free Energy =     | 0.260476                    |
| Sum of electronic and zero-point Energies =   | -1123.884989                |
| Sum of electronic and thermal Energies =      | -1123.862951                |
| Sum of electronic and thermal Enthalpies =    | -1123.862006                |
| Sum of electronic and thermal Free Energies = | -1123.936916                |

### Standard orientation:

| Center Number | Atomic Number | Atomic Type | Coordinates (Angstroms) |           |           |
|---------------|---------------|-------------|-------------------------|-----------|-----------|
|               |               |             | X                       | Y         | Z         |
| 1             | 7             | 0           | 0.980339                | -1.603164 | 0.018252  |
| 2             | 6             | 0           | 2.259627                | -1.882992 | -0.008965 |
| 3             | 7             | 0           | 2.749930                | -3.158868 | 0.015036  |
| 4             | 6             | 0           | 3.195191                | -0.759804 | -0.011373 |
| 5             | 7             | 0           | 0.137149                | -2.715190 | -0.002378 |
| 6             | 6             | 0           | -1.118745               | -2.389301 | 0.028061  |
| 7             | 7             | 0           | -1.575842               | -1.106687 | 0.086238  |
| 8             | 6             | 0           | -2.870291               | -0.633062 | 0.046365  |
| 9             | 6             | 0           | 2.870291                | 0.633062  | -0.046364 |
| 10            | 7             | 0           | 1.575842                | 1.106687  | -0.086236 |
| 11            | 6             | 0           | 1.118745                | 2.389302  | -0.028061 |
| 12            | 7             | 0           | -0.137149               | 2.715190  | 0.002377  |
| 13            | 7             | 0           | -0.980339               | 1.603164  | -0.018251 |
| 14            | 6             | 0           | -2.259627               | 1.882992  | 0.008964  |
| 15            | 6             | 0           | -3.195191               | 0.759804  | 0.011373  |
| 16            | 7             | 0           | -3.953356               | -1.399909 | 0.033322  |
| 17            | 7             | 0           | -4.995535               | -0.520958 | -0.013494 |
| 18            | 6             | 0           | -4.586983               | 0.759938  | -0.029360 |
| 19            | 6             | 0           | -6.358056               | -1.025573 | -0.044118 |
| 20            | 7             | 0           | 3.953356                | 1.399909  | -0.033323 |
| 21            | 7             | 0           | 4.995535                | 0.520958  | 0.013489  |
| 22            | 6             | 0           | 4.586983                | -0.759938 | 0.029358  |
| 23            | 6             | 0           | 6.358056                | 1.025573  | 0.044127  |
| 24            | 1             | 0           | 3.676837                | -3.339246 | -0.336445 |
| 25            | 1             | 0           | 2.063229                | -3.882946 | -0.146444 |
| 26            | 1             | 0           | -0.893980               | -0.350186 | 0.080295  |
| 27            | 1             | 0           | 0.893980                | 0.350186  | -0.080292 |
| 28            | 1             | 0           | -1.857083               | -3.181971 | 0.006027  |
| 29            | 1             | 0           | 1.857083                | 3.181971  | -0.006029 |
| 30            | 1             | 0           | -5.299005               | 1.568384  | -0.076482 |
| 31            | 1             | 0           | -6.556982               | -1.615268 | 0.851998  |
| 32            | 1             | 0           | -7.041027               | -0.178858 | -0.079554 |
| 33            | 1             | 0           | -6.505127               | -1.648352 | -0.927764 |
| 34            | 1             | 0           | 5.299005                | -1.568384 | 0.076478  |
| 35            | 1             | 0           | 6.556972                | 1.615311  | -0.851964 |
| 36            | 1             | 0           | 7.041028                | 0.178857  | 0.079514  |
| 37            | 1             | 0           | 6.505135                | 1.648310  | 0.927801  |
| 38            | 7             | 0           | -2.749929               | 3.158868  | -0.015041 |
| 39            | 1             | 0           | -2.063229               | 3.882947  | 0.146438  |
| 40            | 1             | 0           | -3.676838               | 3.339247  | 0.336437  |

## Promoter: Hydrazine

**Table S17:** Cartesian coordinates and energies of the optimized geometry of hydrazine.

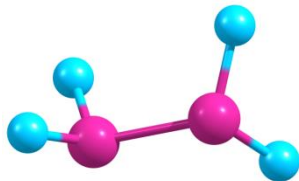

|                                               |                             |
|-----------------------------------------------|-----------------------------|
| Electronic Energy =                           | -111.918802464 a.u.         |
| Zero-point correction =                       | 0.053324 (Hartree/Particle) |
| Thermal correction to Energy =                | 0.056606                    |
| Thermal correction to Enthalpy =              | 0.057551                    |
| Thermal correction to Gibbs Free Energy =     | 0.031349                    |
| Sum of electronic and zero-point Energies =   | -111.865478                 |
| Sum of electronic and thermal Energies =      | -111.862196                 |
| Sum of electronic and thermal Enthalpies =    | -111.861252                 |
| Sum of electronic and thermal Free Energies = | -111.887454                 |

### Standard orientation:

| Center<br>Number | Atomic<br>Number | Atomic<br>Type | Coordinates (Angstroms) |           |           |
|------------------|------------------|----------------|-------------------------|-----------|-----------|
|                  |                  |                | X                       | Y         | Z         |
| 1                | 7                | 0              | -0.000000               | 0.720383  | -0.079845 |
| 2                | 7                | 0              | -0.000000               | -0.720383 | -0.079845 |
| 3                | 1                | 0              | 0.255261                | 1.093310  | 0.832411  |
| 4                | 1                | 0              | -0.947500               | 1.026029  | -0.273499 |
| 5                | 1                | 0              | 0.947500                | -1.026029 | -0.273499 |
| 6                | 1                | 0              | -0.255261               | -1.093310 | 0.832411  |

## Intermediates: Intermediate C

**Table S18:** Cartesian coordinates and energies of the optimized geometry of intermediate C (1<sup>st</sup> isomer).

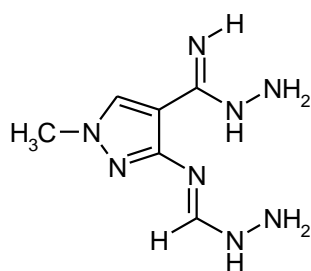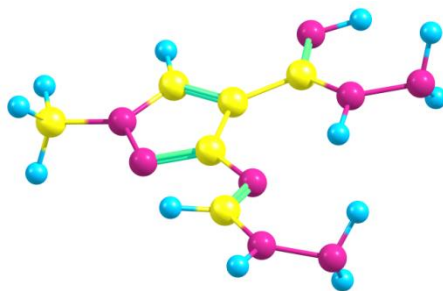

|                                               |                             |
|-----------------------------------------------|-----------------------------|
| Electronic Energy =                           | -674.00692689 a.u.          |
| Zero-point correction =                       | 0.210611 (Hartree/Particle) |
| Thermal correction to Energy =                | 0.225592                    |
| Thermal correction to Enthalpy =              | 0.226537                    |
| Thermal correction to Gibbs Free Energy =     | 0.167107                    |
| Sum of electronic and zero-point Energies =   | -673.796316                 |
| Sum of electronic and thermal Energies =      | -673.781335                 |
| Sum of electronic and thermal Enthalpies =    | -673.780390                 |
| Sum of electronic and thermal Free Energies = | -673.839820                 |
| Standard orientation:                         |                             |

| Center Number | Atomic Number | Atomic Type | Coordinates (Angstroms) |           |           |
|---------------|---------------|-------------|-------------------------|-----------|-----------|
|               |               |             | X                       | Y         | Z         |
| 1             | 6             | 0           | 0.289394                | -0.651909 | 0.036032  |
| 2             | 7             | 0           | 1.091381                | -1.722312 | 0.071525  |
| 3             | 6             | 0           | 1.051362                | 0.554162  | -0.012038 |
| 4             | 6             | 0           | 2.370403                | 0.119497  | -0.018115 |
| 5             | 6             | 0           | 3.488570                | -2.131216 | 0.066541  |
| 6             | 7             | 0           | 2.352521                | -1.224619 | 0.029051  |
| 7             | 6             | 0           | 0.610161                | 1.959396  | -0.040885 |
| 8             | 7             | 0           | -0.753524               | 2.119996  | -0.125860 |
| 9             | 7             | 0           | -1.396795               | 3.358918  | 0.012750  |
| 10            | 7             | 0           | 1.485574                | 2.912373  | -0.000927 |
| 11            | 7             | 0           | -1.101275               | -0.718141 | 0.076059  |
| 12            | 6             | 0           | -1.678274               | -1.828589 | -0.241966 |
| 13            | 7             | 0           | -3.013294               | -2.000285 | -0.174157 |
| 14            | 7             | 0           | -3.919213               | -1.029203 | 0.283388  |
| 15            | 1             | 0           | -1.335364               | 1.298812  | 0.009665  |
| 16            | 1             | 0           | -1.197898               | 3.949264  | -0.790500 |
| 17            | 1             | 0           | -1.076714               | 3.841395  | 0.851106  |
| 18            | 1             | 0           | 1.031209                | 3.824591  | -0.033595 |
| 19            | 1             | 0           | -3.416631               | -2.885988 | -0.433951 |
| 20            | 1             | 0           | -3.620087               | -0.715569 | 1.204788  |
| 21            | 1             | 0           | -3.870863               | -0.220109 | -0.332615 |
| 22            | 1             | 0           | 3.291127                | 0.678159  | -0.050037 |
| 23            | 1             | 0           | 3.478982                | -2.704189 | 0.995094  |
| 24            | 1             | 0           | 4.403435                | -1.543996 | 0.012335  |
| 25            | 1             | 0           | 3.446110                | -2.816130 | -0.781461 |
| 26            | 1             | 0           | -1.140623               | -2.711382 | -0.591044 |

**Table S19:** Cartesian coordinates and energies of the optimized geometry of intermediate C (2<sup>nd</sup> isomer).

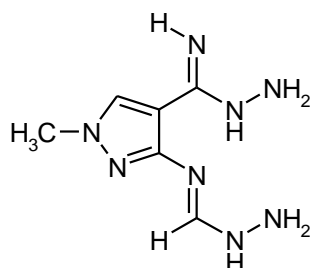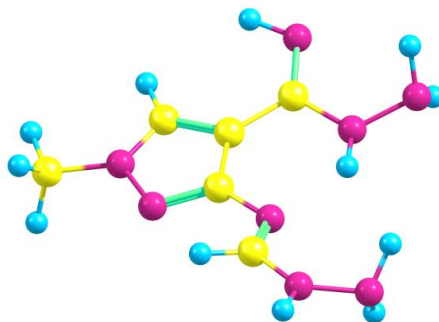

|                                               |                             |
|-----------------------------------------------|-----------------------------|
| Electronic Energy =                           | -674.007044705 a.u.         |
| Zero-point correction =                       | 0.210611 (Hartree/Particle) |
| Thermal correction to Energy =                | 0.225740                    |
| Thermal correction to Enthalpy =              | 0.226684                    |
| Thermal correction to Gibbs Free Energy =     | 0.167371                    |
| Sum of electronic and zero-point Energies =   | -673.796433                 |
| Sum of electronic and thermal Energies =      | -673.781305                 |
| Sum of electronic and thermal Enthalpies =    | -673.780360                 |
| Sum of electronic and thermal Free Energies = | -673.839673                 |

Standard orientation:

| Center Number | Atomic Number | Atomic Type | Coordinates (Angstroms) |           |           |
|---------------|---------------|-------------|-------------------------|-----------|-----------|
|               |               |             | X                       | Y         | Z         |
| 1             | 6             | 0           | 0.287902                | -0.645987 | 0.048259  |
| 2             | 7             | 0           | 1.091576                | -1.713871 | 0.086027  |
| 3             | 6             | 0           | 1.047256                | 0.563988  | 0.006299  |
| 4             | 6             | 0           | 2.367520                | 0.129614  | 0.013272  |
| 5             | 6             | 0           | 3.489284                | -2.118172 | 0.126435  |
| 6             | 7             | 0           | 2.351765                | -1.214708 | 0.057125  |
| 7             | 6             | 0           | 0.582190                | 1.963918  | -0.049421 |
| 8             | 7             | 0           | -0.736978               | 2.132120  | 0.295745  |
| 9             | 7             | 0           | -1.404028               | 3.354707  | 0.069650  |
| 10            | 7             | 0           | 1.300297                | 2.994214  | -0.366457 |
| 11            | 7             | 0           | -1.101742               | -0.715658 | 0.069799  |
| 12            | 6             | 0           | -1.671083               | -1.811682 | -0.307616 |
| 13            | 7             | 0           | -3.005096               | -1.992277 | -0.257669 |
| 14            | 7             | 0           | -3.919362               | -1.044700 | 0.231524  |
| 15            | 1             | 0           | -1.325136               | 1.305033  | 0.269822  |
| 16            | 1             | 0           | -1.046950               | 3.757303  | -0.797242 |
| 17            | 1             | 0           | -1.130130               | 4.005255  | 0.802516  |
| 18            | 1             | 0           | 2.247563                | 2.709548  | -0.599417 |
| 19            | 1             | 0           | -3.404606               | -2.858391 | -0.581780 |
| 20            | 1             | 0           | -3.646951               | -0.790768 | 1.179178  |
| 21            | 1             | 0           | -3.847215               | -0.199337 | -0.331284 |
| 22            | 1             | 0           | 3.296163                | 0.678217  | 0.004503  |
| 23            | 1             | 0           | 4.403663                | -1.532180 | 0.054417  |
| 24            | 1             | 0           | 3.447567                | -2.828625 | -0.699981 |
| 25            | 1             | 0           | 3.478857                | -2.661722 | 1.072545  |
| 26            | 1             | 0           | -1.126267               | -2.673185 | -0.696849 |

**Table S20:** Cartesian coordinates and energies of the optimized geometry of intermediate C (3<sup>rd</sup> isomer).

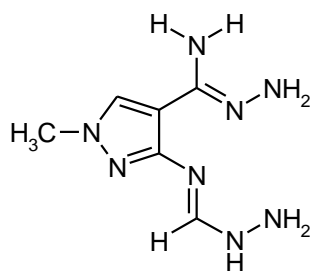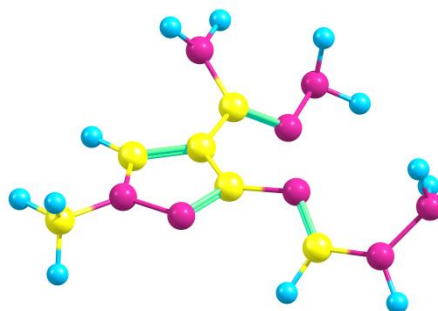

|                                               |                             |
|-----------------------------------------------|-----------------------------|
| Electronic Energy =                           | -674.005063821 a.u.         |
| Zero-point correction =                       | 0.209516 (Hartree/Particle) |
| Thermal correction to Energy =                | 0.224867                    |
| Thermal correction to Enthalpy =              | 0.225812                    |
| Thermal correction to Gibbs Free Energy =     | 0.166275                    |
| Sum of electronic and zero-point Energies =   | -673.795547                 |
| Sum of electronic and thermal Energies =      | -673.780196                 |
| Sum of electronic and thermal Enthalpies =    | -673.779252                 |
| Sum of electronic and thermal Free Energies = | -673.838789                 |

Standard orientation:

| Center Number | Atomic Number | Atomic Type | Coordinates (Angstroms) |           |           |
|---------------|---------------|-------------|-------------------------|-----------|-----------|
|               |               |             | X                       | Y         | Z         |
| 1             | 6             | 0           | 0.056795                | -0.703755 | 0.064608  |
| 2             | 7             | 0           | -0.324321               | -1.988157 | 0.032555  |
| 3             | 6             | 0           | -1.078424               | 0.160048  | 0.018344  |
| 4             | 6             | 0           | -2.162036               | -0.707512 | -0.050572 |
| 5             | 6             | 0           | -2.423428               | -3.210758 | -0.091775 |
| 6             | 7             | 0           | -1.676980               | -1.964569 | -0.047225 |
| 7             | 6             | 0           | -1.156602               | 1.627746  | 0.029660  |
| 8             | 7             | 0           | -0.271535               | 2.323865  | -0.603140 |
| 9             | 7             | 0           | -0.450376               | 3.734456  | -0.520578 |
| 10            | 7             | 0           | -2.251876               | 2.160648  | 0.685036  |
| 11            | 7             | 0           | 1.385124                | -0.325489 | 0.212954  |
| 12            | 6             | 0           | 2.284769                | -1.041090 | -0.363126 |
| 13            | 7             | 0           | 3.612273                | -0.836892 | -0.179975 |
| 14            | 7             | 0           | 4.137378                | 0.230180  | 0.572079  |
| 15            | 1             | 0           | -0.447192               | 4.050570  | 0.452309  |
| 16            | 1             | 0           | 0.365651                | 4.149469  | -0.955724 |
| 17            | 1             | 0           | -2.652505               | 1.642922  | 1.450944  |
| 18            | 1             | 0           | 4.265920                | -1.286392 | -0.801355 |
| 19            | 1             | 0           | 3.633691                | 1.079935  | 0.322724  |
| 20            | 1             | 0           | 3.940478                | 0.057326  | 1.555443  |
| 21            | 1             | 0           | -3.220015               | -0.509415 | -0.118364 |
| 22            | 1             | 0           | -3.485485               | -2.978523 | -0.148716 |
| 23            | 1             | 0           | -2.228569               | -3.796276 | 0.808334  |
| 24            | 1             | 0           | -2.132495               | -3.790349 | -0.969276 |
| 25            | 1             | 0           | -2.346419               | 3.162012  | 0.741198  |
| 26            | 1             | 0           | 2.062687                | -1.867647 | -1.042292 |

**Table S21:** Cartesian coordinates and energies of the optimized geometry of intermediate **C** (4<sup>th</sup> isomer).

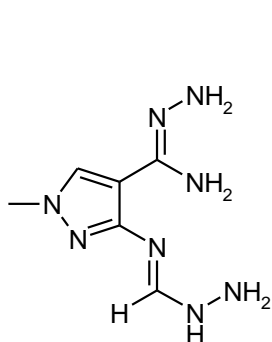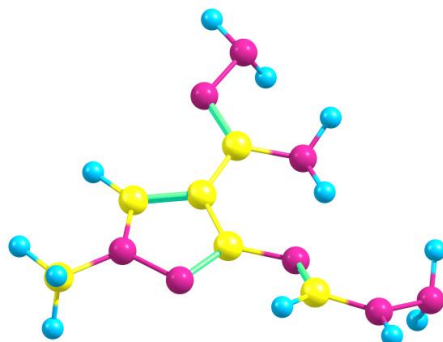

|                                               |                             |
|-----------------------------------------------|-----------------------------|
| Electronic Energy =                           | -674.013385002 a.u.         |
| Zero-point correction =                       | 0.210391 (Hartree/Particle) |
| Thermal correction to Energy =                | 0.225326                    |
| Thermal correction to Enthalpy =              | 0.226270                    |
| Thermal correction to Gibbs Free Energy =     | 0.167609                    |
| Sum of electronic and zero-point Energies =   | -673.802994                 |
| Sum of electronic and thermal Energies =      | -673.788059                 |
| Sum of electronic and thermal Enthalpies =    | -673.787115                 |
| Sum of electronic and thermal Free Energies = | -673.845776                 |

Standard orientation:

| Center Number | Atomic Number | Atomic Type | Coordinates (Angstroms) |           |           |
|---------------|---------------|-------------|-------------------------|-----------|-----------|
|               |               |             | X                       | Y         | Z         |
| 1             | 6             | 0           | 0.336523                | 0.643011  | 0.053196  |
| 2             | 7             | 0           | 0.353647                | 1.981964  | 0.065210  |
| 3             | 6             | 0           | -1.001761               | 0.149365  | 0.038235  |
| 4             | 6             | 0           | -1.783849               | 1.297187  | 0.032142  |
| 5             | 6             | 0           | -1.299146               | 3.764857  | 0.083291  |
| 6             | 7             | 0           | -0.949130               | 2.354491  | 0.042731  |
| 7             | 6             | 0           | -1.470063               | -1.240638 | 0.013995  |
| 8             | 7             | 0           | -2.716297               | -1.479298 | -0.242649 |
| 9             | 7             | 0           | -3.054761               | -2.860471 | -0.229176 |
| 10            | 7             | 0           | -0.549191               | -2.222955 | 0.332264  |
| 11            | 7             | 0           | 1.481335                | -0.150424 | 0.078738  |
| 12            | 6             | 0           | 2.595868                | 0.362114  | -0.321616 |
| 13            | 7             | 0           | 3.766458                | -0.306270 | -0.269197 |
| 14            | 7             | 0           | 3.919382                | -1.603582 | 0.246956  |
| 15            | 1             | 0           | -2.808883               | -3.292174 | 0.664633  |
| 16            | 1             | 0           | -4.063239               | -2.912597 | -0.313592 |
| 17            | 1             | 0           | 0.421091                | -1.923335 | 0.281941  |
| 18            | 1             | 0           | 4.606673                | 0.129225  | -0.614087 |
| 19            | 1             | 0           | 3.566359                | -1.616262 | 1.201948  |
| 20            | 1             | 0           | 3.334345                | -2.240554 | -0.290269 |
| 21            | 1             | 0           | -0.738071               | -3.132550 | -0.070327 |
| 22            | 1             | 0           | -2.854528               | 1.417055  | 0.028018  |
| 23            | 1             | 0           | -2.382575               | 3.856205  | 0.029282  |
| 24            | 1             | 0           | -0.849339               | 4.283676  | -0.764352 |
| 25            | 1             | 0           | -0.942880               | 4.213770  | 1.012089  |
| 26            | 1             | 0           | 2.685508                | 1.367979  | -0.734876 |



**Table S22:** Cartesian coordinates and energies of the optimized geometry of intermediate **C** (5<sup>th</sup> isomer).

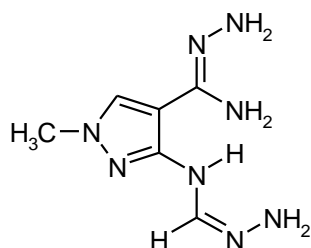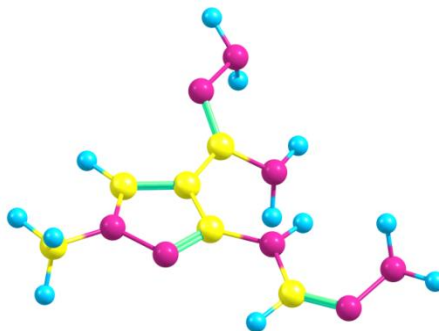

|                                               |                             |
|-----------------------------------------------|-----------------------------|
| Electronic Energy =                           | -674.008125348 a.u.         |
| Zero-point correction =                       | 0.210306 (Hartree/Particle) |
| Thermal correction to Energy =                | 0.225100                    |
| Thermal correction to Enthalpy =              | 0.226044                    |
| Thermal correction to Gibbs Free Energy =     | 0.167863                    |
| Sum of electronic and zero-point Energies =   | -673.797820                 |
| Sum of electronic and thermal Energies =      | -673.783025                 |
| Sum of electronic and thermal Enthalpies =    | -673.782081                 |
| Sum of electronic and thermal Free Energies = | -673.840263                 |

Standard orientation:

| Center Number | Atomic Number | Atomic Type | Coordinates (Angstroms) |           |           |
|---------------|---------------|-------------|-------------------------|-----------|-----------|
|               |               |             | X                       | Y         | Z         |
| 1             | 6             | 0           | 0.357685                | 0.645242  | 0.002987  |
| 2             | 7             | 0           | 0.415771                | 1.973343  | -0.056364 |
| 3             | 6             | 0           | -0.985037               | 0.178145  | 0.079336  |
| 4             | 6             | 0           | -1.737178               | 1.345986  | 0.066790  |
| 5             | 6             | 0           | -1.190405               | 3.800873  | -0.022782 |
| 6             | 7             | 0           | -0.882267               | 2.380710  | -0.011195 |
| 7             | 6             | 0           | -1.477524               | -1.202086 | 0.123074  |
| 8             | 7             | 0           | -2.581902               | -1.491410 | -0.477198 |
| 9             | 7             | 0           | -3.005072               | -2.840266 | -0.359505 |
| 10            | 7             | 0           | -0.653846               | -2.121059 | 0.769763  |
| 11            | 7             | 0           | 1.504726                | -0.139960 | -0.056777 |
| 12            | 1             | 0           | -3.098540               | -3.119978 | 0.619345  |
| 13            | 1             | 0           | -3.931963               | -2.888207 | -0.766220 |
| 14            | 1             | 0           | -0.237675               | -1.821076 | 1.641138  |
| 15            | 1             | 0           | -0.980501               | -3.076245 | 0.796844  |
| 16            | 1             | 0           | 1.360968                | -1.140363 | 0.005672  |
| 17            | 6             | 0           | 2.784972                | 0.353126  | 0.072790  |
| 18            | 7             | 0           | 3.865907                | -0.333768 | -0.008359 |
| 19            | 7             | 0           | 3.681645                | -1.719957 | -0.235013 |
| 20            | 1             | 0           | 4.597622                | -2.115580 | -0.410818 |
| 21            | 1             | 0           | 3.116578                | -1.892883 | -1.068716 |
| 22            | 1             | 0           | -2.804259               | 1.487442  | 0.119424  |
| 23            | 1             | 0           | -2.272293               | 3.920845  | -0.021245 |
| 24            | 1             | 0           | -0.775757               | 4.263153  | -0.919640 |
| 25            | 1             | 0           | -0.770237               | 4.284167  | 0.860883  |
| 26            | 1             | 0           | 2.866256                | 1.417578  | 0.252694  |

**Table S23:** Cartesian coordinates and energies of the optimized geometry of intermediate **C** (6<sup>th</sup> isomer).

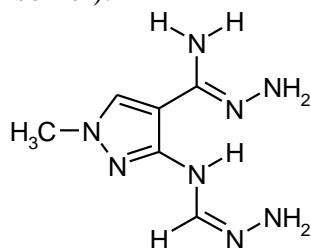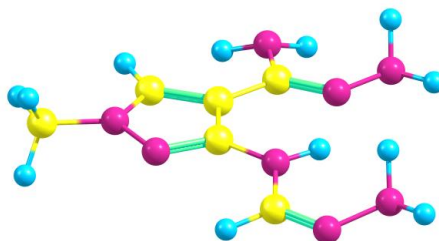

|                                               |                             |
|-----------------------------------------------|-----------------------------|
| Electronic Energy =                           | -674.015849881 a.u.         |
| Zero-point correction =                       | 0.210450 (Hartree/Particle) |
| Thermal correction to Energy =                | 0.225114                    |
| Thermal correction to Enthalpy =              | 0.226058                    |
| Thermal correction to Gibbs Free Energy =     | 0.168109                    |
| Sum of electronic and zero-point Energies =   | -673.805400                 |
| Sum of electronic and thermal Energies =      | -673.790736                 |
| Sum of electronic and thermal Enthalpies =    | -673.789792                 |
| Sum of electronic and thermal Free Energies = | -673.847741                 |

Standard orientation:

| Center Number | Atomic Number | Atomic Type | Coordinates (Angstroms) |           |           |
|---------------|---------------|-------------|-------------------------|-----------|-----------|
|               |               |             | X                       | Y         | Z         |
| 1             | 6             | 0           | -0.279546               | -0.692543 | 0.014643  |
| 2             | 7             | 0           | -1.098053               | -1.740019 | 0.040620  |
| 3             | 6             | 0           | -0.994128               | 0.540969  | 0.002313  |
| 4             | 6             | 0           | -2.327364               | 0.142945  | 0.025583  |
| 5             | 6             | 0           | -3.507390               | -2.079022 | 0.080009  |
| 6             | 7             | 0           | -2.349271               | -1.202336 | 0.042392  |
| 7             | 6             | 0           | -0.425123               | 1.884572  | -0.033533 |
| 8             | 7             | 0           | 0.864600                | 2.003168  | 0.042264  |
| 9             | 7             | 0           | 1.339073                | 3.340438  | -0.026272 |
| 10            | 7             | 0           | -1.281622               | 2.969604  | -0.086819 |
| 11            | 7             | 0           | 1.099662                | -0.811213 | 0.010734  |
| 12            | 1             | 0           | 0.997181                | 3.885179  | 0.767758  |
| 13            | 1             | 0           | 2.347206                | 3.294509  | 0.067447  |
| 14            | 1             | 0           | -2.205558               | 2.797119  | -0.455464 |
| 15            | 1             | 0           | -0.861175               | 3.811197  | -0.463679 |
| 16            | 1             | 0           | 1.579150                | 0.089038  | -0.006095 |
| 17            | 6             | 0           | 1.776289                | -1.991558 | -0.200591 |
| 18            | 7             | 0           | 3.050222                | -2.145840 | -0.165726 |
| 19            | 7             | 0           | 3.798540                | -0.976140 | 0.093741  |
| 20            | 1             | 0           | 4.749455                | -1.265592 | 0.289049  |
| 21            | 1             | 0           | 3.456582                | -0.475056 | 0.915808  |
| 22            | 1             | 0           | -3.242197               | 0.714033  | 0.039113  |
| 23            | 1             | 0           | -4.407218               | -1.466856 | 0.065288  |
| 24            | 1             | 0           | -3.492470               | -2.680447 | 0.990404  |
| 25            | 1             | 0           | -3.503533               | -2.738347 | -0.789255 |
| 26            | 1             | 0           | 1.164101                | -2.860595 | -0.407454 |

**Table S24:** Cartesian coordinates and energies of the optimized geometry of intermediate **C** (7<sup>th</sup> isomer).

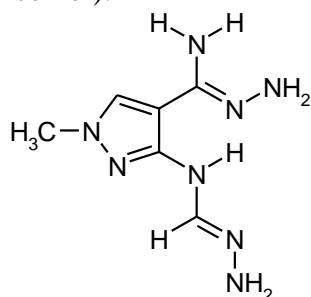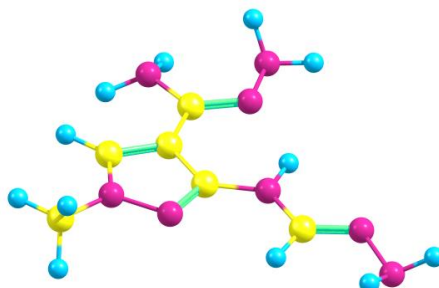

|                                               |                             |
|-----------------------------------------------|-----------------------------|
| Electronic Energy =                           | -674.012513200 a.u.         |
| Zero-point correction =                       | 0.209757 (Hartree/Particle) |
| Thermal correction to Energy =                | 0.224686                    |
| Thermal correction to Enthalpy =              | 0.225631                    |
| Thermal correction to Gibbs Free Energy =     | 0.167105                    |
| Sum of electronic and zero-point Energies =   | -673.802756                 |
| Sum of electronic and thermal Energies =      | -673.787827                 |
| Sum of electronic and thermal Enthalpies =    | -673.786883                 |
| Sum of electronic and thermal Free Energies = | -673.845408                 |

Standard orientation:

| Center Number | Atomic Number | Atomic Type | Coordinates (Angstroms) |           |           |
|---------------|---------------|-------------|-------------------------|-----------|-----------|
|               |               |             | X                       | Y         | Z         |
| 1             | 6             | 0           | -0.174592               | 0.529012  | -0.003199 |
| 2             | 7             | 0           | -0.358762               | 1.847599  | 0.013453  |
| 3             | 6             | 0           | 1.211682                | 0.187739  | -0.003871 |
| 4             | 6             | 0           | 1.850521                | 1.424031  | 0.018913  |
| 5             | 6             | 0           | 1.071918                | 3.816115  | 0.053098  |
| 6             | 7             | 0           | 0.899251                | 2.374422  | 0.024702  |
| 7             | 6             | 0           | 1.790328                | -1.151500 | -0.025102 |
| 8             | 7             | 0           | 0.990171                | -2.168030 | 0.072360  |
| 9             | 7             | 0           | 1.636631                | -3.432889 | 0.018036  |
| 10            | 7             | 0           | 3.167755                | -1.278318 | -0.088474 |
| 11            | 7             | 0           | -1.212133               | -0.377990 | -0.022598 |
| 12            | 1             | 0           | 2.268866                | -3.548309 | 0.812457  |
| 13            | 1             | 0           | 0.910536                | -4.132031 | 0.124347  |
| 14            | 1             | 0           | 3.671619                | -0.498475 | -0.485484 |
| 15            | 1             | 0           | 3.482486                | -2.170435 | -0.452337 |
| 16            | 1             | 0           | -0.921029               | -1.352676 | 0.020229  |
| 17            | 6             | 0           | -2.548793               | -0.044228 | -0.046959 |
| 18            | 7             | 0           | -3.453770               | -0.944443 | 0.006355  |
| 19            | 7             | 0           | -4.785682               | -0.505893 | -0.126328 |
| 20            | 1             | 0           | -5.374093               | -1.143708 | 0.397179  |
| 21            | 1             | 0           | -4.928914               | 0.434393  | 0.244306  |
| 22            | 1             | 0           | 2.897102                | 1.684281  | 0.041486  |
| 23            | 1             | 0           | 2.137298                | 4.038972  | 0.056298  |
| 24            | 1             | 0           | 0.612318                | 4.231024  | 0.951802  |
| 25            | 1             | 0           | 0.610983                | 4.265050  | -0.828313 |
| 26            | 1             | 0           | -2.757784               | 1.023687  | -0.121785 |

**Table S25:** Cartesian coordinates and energies of the optimized geometry of intermediate **C** (8<sup>th</sup> isomer).

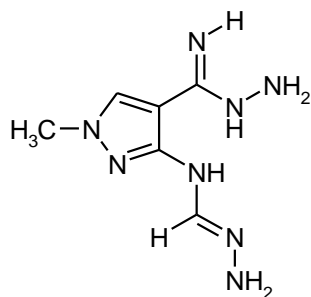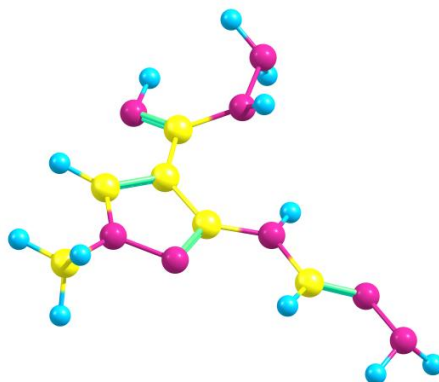

|                                               |                             |
|-----------------------------------------------|-----------------------------|
| Electronic Energy =                           | -673.999303772 a.u.         |
| Zero-point correction =                       | 0.210274 (Hartree/Particle) |
| Thermal correction to Energy =                | 0.225119                    |
| Thermal correction to Enthalpy =              | 0.226063                    |
| Thermal correction to Gibbs Free Energy =     | 0.167426                    |
| Sum of electronic and zero-point Energies =   | -673.789030                 |
| Sum of electronic and thermal Energies =      | -673.774185                 |
| Sum of electronic and thermal Enthalpies =    | -673.773241                 |
| Sum of electronic and thermal Free Energies = | -673.831877                 |

Standard orientation:

| Center Number | Atomic Number | Atomic Type | Coordinates (Angstroms) |           |           |
|---------------|---------------|-------------|-------------------------|-----------|-----------|
|               |               |             | X                       | Y         | Z         |
| 1             | 6             | 0           | 0.198411                | 0.486983  | -0.005178 |
| 2             | 7             | 0           | 0.510312                | 1.779870  | -0.083846 |
| 3             | 6             | 0           | -1.213142               | 0.292218  | 0.062755  |
| 4             | 6             | 0           | -1.723897               | 1.584331  | 0.019784  |
| 5             | 6             | 0           | -0.716818               | 3.879133  | -0.184475 |
| 6             | 7             | 0           | -0.687994               | 2.430326  | -0.075796 |
| 7             | 6             | 0           | -1.999369               | -0.943336 | 0.187408  |
| 8             | 7             | 0           | 1.175645                | -0.494304 | 0.025626  |
| 9             | 1             | 0           | 0.882514                | -1.435364 | 0.251118  |
| 10            | 6             | 0           | 2.534302                | -0.242358 | -0.018878 |
| 11            | 7             | 0           | 3.376943                | -1.173895 | 0.205397  |
| 12            | 7             | 0           | 4.734438                | -0.859345 | 0.014558  |
| 13            | 1             | 0           | 5.277284                | -1.429832 | 0.652370  |
| 14            | 1             | 0           | 4.943221                | 0.121317  | 0.205778  |
| 15            | 7             | 0           | -3.116053               | -0.947695 | 0.825472  |
| 16            | 7             | 0           | -1.387930               | -2.055586 | -0.397702 |
| 17            | 7             | 0           | -2.036660               | -3.301903 | -0.485190 |
| 18            | 1             | 0           | -3.560180               | -1.865533 | 0.786136  |
| 19            | 1             | 0           | -0.834902               | -1.862708 | -1.222293 |
| 20            | 1             | 0           | -2.039736               | -3.748070 | 0.426643  |
| 21            | 1             | 0           | -2.999146               | -3.199205 | -0.803876 |
| 22            | 1             | 0           | -2.745707               | 1.926366  | 0.040316  |
| 23            | 1             | 0           | -1.751652               | 4.211158  | -0.125012 |
| 24            | 1             | 0           | -0.288538               | 4.192120  | -1.138133 |
| 25            | 1             | 0           | -0.145524               | 4.323341  | 0.631824  |
| 26            | 1             | 0           | 2.804539                | 0.782311  | -0.272998 |

**Table S26:** Cartesian coordinates and energies of the optimized geometry of intermediate **C** (9<sup>th</sup> isomer).

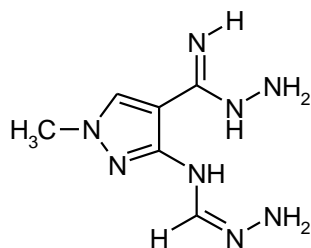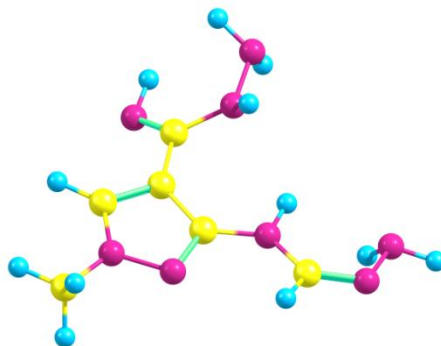

|                                               |                             |
|-----------------------------------------------|-----------------------------|
| Electronic Energy =                           | -674.001927298 a.u.         |
| Zero-point correction =                       | 0.211029 (Hartree/Particle) |
| Thermal correction to Energy =                | 0.225602                    |
| Thermal correction to Enthalpy =              | 0.226546                    |
| Thermal correction to Gibbs Free Energy =     | 0.168511                    |
| Sum of electronic and zero-point Energies =   | -673.790898                 |
| Sum of electronic and thermal Energies =      | -673.776326                 |
| Sum of electronic and thermal Enthalpies =    | -673.775381                 |
| Sum of electronic and thermal Free Energies = | -673.833416                 |

Standard orientation:

| Center Number | Atomic Number | Atomic Type | Coordinates (Angstroms) |           |           |
|---------------|---------------|-------------|-------------------------|-----------|-----------|
|               |               |             | X                       | Y         | Z         |
| 1             | 6             | 0           | 0.276996                | -0.661756 | 0.022803  |
| 2             | 7             | 0           | 1.082474                | -1.719311 | -0.034904 |
| 3             | 6             | 0           | 1.012543                | 0.557241  | 0.064752  |
| 4             | 6             | 0           | 2.337784                | 0.140223  | 0.027247  |
| 5             | 6             | 0           | 3.484642                | -2.092332 | -0.136005 |
| 6             | 7             | 0           | 2.340843                | -1.200010 | -0.040826 |
| 7             | 6             | 0           | 0.538447                | 1.945986  | 0.166714  |
| 8             | 7             | 0           | -1.104409               | -0.808584 | 0.089293  |
| 9             | 1             | 0           | -1.646610               | 0.042223  | 0.166365  |
| 10            | 6             | 0           | -1.768134               | -1.987233 | -0.179352 |
| 11            | 7             | 0           | -3.033577               | -2.173354 | -0.082151 |
| 12            | 7             | 0           | -3.777999               | -1.040671 | 0.328262  |
| 13            | 1             | 0           | -4.728805               | -1.352188 | 0.487343  |
| 14            | 1             | 0           | -3.433811               | -0.665657 | 1.214203  |
| 15            | 7             | 0           | 1.203735                | 2.819425  | 0.834205  |
| 16            | 7             | 0           | -0.686842               | 2.161060  | -0.472459 |
| 17            | 7             | 0           | -1.257004               | 3.444681  | -0.572464 |
| 18            | 1             | 0           | 0.767069                | 3.740024  | 0.775157  |
| 19            | 1             | 0           | -0.832983               | 1.621792  | -1.315973 |
| 20            | 1             | 0           | -1.642876               | 3.715319  | 0.326614  |
| 21            | 1             | 0           | -0.565979               | 4.138126  | -0.855527 |
| 22            | 1             | 0           | 3.248141                | 0.717202  | 0.033510  |
| 23            | 1             | 0           | 4.394027                | -1.497293 | -0.077964 |
| 24            | 1             | 0           | 3.461868                | -2.630977 | -1.084655 |
| 25            | 1             | 0           | 3.464833                | -2.807225 | 0.687438  |
| 26            | 1             | 0           | -1.149077               | -2.816764 | -0.496158 |

**Table S27:** Cartesian coordinates and energies of the optimized geometry of intermediate **C** (10<sup>th</sup> isomer).

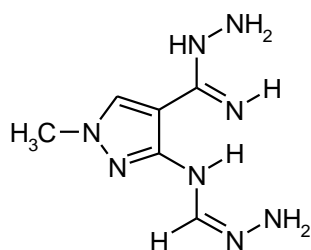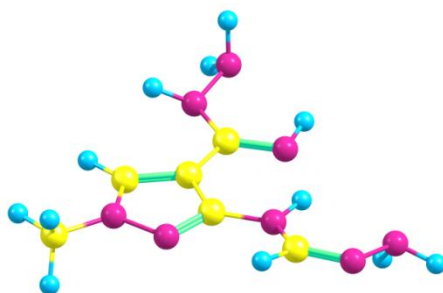

|                                               |                             |
|-----------------------------------------------|-----------------------------|
| Electronic Energy =                           | -674.010164885 a.u.         |
| Zero-point correction =                       | 0.210855 (Hartree/Particle) |
| Thermal correction to Energy =                | 0.225408                    |
| Thermal correction to Enthalpy =              | 0.226352                    |
| Thermal correction to Gibbs Free Energy =     | 0.168468                    |
| Sum of electronic and zero-point Energies =   | -673.799310                 |
| Sum of electronic and thermal Energies =      | -673.784757                 |
| Sum of electronic and thermal Enthalpies =    | -673.783813                 |
| Sum of electronic and thermal Free Energies = | -673.841697                 |

Standard orientation:

| Center Number | Atomic Number | Atomic Type | Coordinates (Angstroms) |           |           |
|---------------|---------------|-------------|-------------------------|-----------|-----------|
|               |               |             | X                       | Y         | Z         |
| 1             | 6             | 0           | -0.403662               | 0.661707  | -0.023912 |
| 2             | 7             | 0           | -0.442132               | 1.990747  | -0.006193 |
| 3             | 6             | 0           | 0.933367                | 0.168672  | -0.061454 |
| 4             | 6             | 0           | 1.706509                | 1.326555  | -0.069688 |
| 5             | 6             | 0           | 1.198289                | 3.788985  | -0.034469 |
| 6             | 7             | 0           | 0.866206                | 2.373979  | -0.030433 |
| 7             | 6             | 0           | 1.321394                | -1.241965 | -0.076568 |
| 8             | 7             | 0           | -1.535376               | -0.132271 | -0.017628 |
| 9             | 1             | 0           | -1.315066               | -1.130265 | -0.057362 |
| 10            | 6             | 0           | -2.806224               | 0.328761  | 0.242821  |
| 11            | 7             | 0           | -3.882983               | -0.369332 | 0.210197  |
| 12            | 7             | 0           | -3.716985               | -1.736518 | -0.099416 |
| 13            | 1             | 0           | -4.635752               | -2.113609 | -0.298772 |
| 14            | 1             | 0           | -3.139737               | -1.878796 | -0.930184 |
| 15            | 7             | 0           | 0.411043                | -2.150691 | -0.203069 |
| 16            | 7             | 0           | 2.681480                | -1.494279 | 0.011697  |
| 17            | 7             | 0           | 3.090496                | -2.833612 | 0.160551  |
| 18            | 1             | 0           | 0.846559                | -3.073002 | -0.171954 |
| 19            | 1             | 0           | 3.252746                | -0.790335 | 0.461221  |
| 20            | 1             | 0           | 3.891112                | -3.003235 | -0.438404 |
| 21            | 1             | 0           | 3.358056                | -3.022712 | 1.123284  |
| 22            | 1             | 0           | 2.774056                | 1.472251  | -0.113358 |
| 23            | 1             | 0           | 2.281804                | 3.891977  | -0.049761 |
| 24            | 1             | 0           | 0.800964                | 4.265952  | 0.862631  |
| 25            | 1             | 0           | 0.774867                | 4.269426  | -0.917817 |
| 26            | 1             | 0           | -2.889897               | 1.379892  | 0.490147  |

**Table S28.** Relative electronic ( $\Delta E$ , kcal/mol) and Gibbs free energies ( $\Delta G$ , kcal/mol) of various isomers (tautomers, conformers, and geometric isomers) of intermediate **C** in MeOH solution.<sup>a</sup>

| Isomer of intermediate <b>C</b> | $\Delta E$ | $\Delta G$ |
|---------------------------------|------------|------------|
| <b>1</b>                        | 5.60       | 4.97       |
| <b>2</b>                        | 5.53       | 5.06       |
| <b>3</b>                        | 6.77       | 5.62       |
| <b>4</b>                        | 1.55       | 1.23       |
| <b>5</b>                        | 4.85       | 4.69       |
| <b>6</b>                        | 0.00       | 0.00       |
| <b>7</b>                        | 2.09       | 1.46       |
| <b>8</b>                        | 10.38      | 9.95       |
| <b>9</b>                        | 8.74       | 8.99       |
| <b>10</b>                       | 3.57       | 3.79       |

<sup>a</sup> Calculated using data of Tables S18-S27.

**Comment:** the most stable isomer of intermediate **C** is number 6:

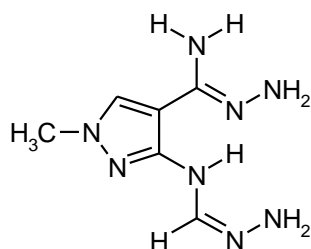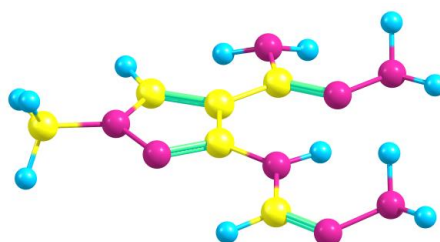

## Intermediates: Intermediate A

**Table S29:** Cartesian coordinates and energies of the optimized geometry of intermediate A (1<sup>st</sup> isomer).

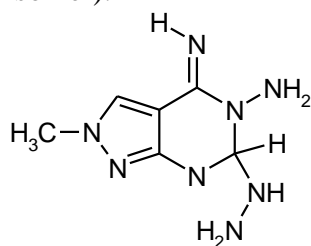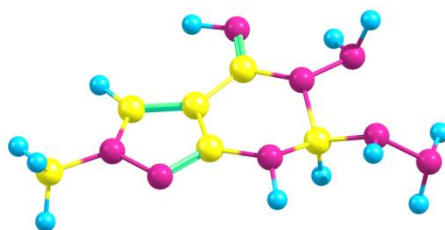

|                                               |                             |
|-----------------------------------------------|-----------------------------|
| Electronic Energy =                           | -673.990150619 a.u.         |
| Zero-point correction =                       | 0.213448 (Hartree/Particle) |
| Thermal correction to Energy =                | 0.226714                    |
| Thermal correction to Enthalpy =              | 0.227658                    |
| Thermal correction to Gibbs Free Energy =     | 0.173881                    |
| Sum of electronic and zero-point Energies =   | -673.776702                 |
| Sum of electronic and thermal Energies =      | -673.763437                 |
| Sum of electronic and thermal Enthalpies =    | -673.762493                 |
| Sum of electronic and thermal Free Energies = | -673.816270                 |

Standard orientation:

| Center Number | Atomic Number | Atomic Type | Coordinates (Angstroms) |           |           |
|---------------|---------------|-------------|-------------------------|-----------|-----------|
|               |               |             | X                       | Y         | Z         |
| 1             | 6             | 0           | 4.379634                | -0.625427 | 0.143103  |
| 2             | 7             | 0           | 2.958369                | -0.335848 | 0.049362  |
| 3             | 6             | 0           | 2.353116                | 0.864141  | 0.105987  |
| 4             | 6             | 0           | 0.987198                | 0.632869  | -0.011853 |
| 5             | 7             | 0           | 2.069956                | -1.368504 | -0.097639 |
| 6             | 6             | 0           | 0.887576                | -0.768604 | -0.138155 |
| 7             | 6             | 0           | -0.191101               | 1.486012  | -0.050569 |
| 8             | 7             | 0           | -1.363706               | 0.762925  | -0.271143 |
| 9             | 7             | 0           | -2.582564               | 1.464146  | -0.048241 |
| 10            | 6             | 0           | -1.483922               | -0.653952 | 0.165677  |
| 11            | 7             | 0           | -0.330709               | -1.403565 | -0.318736 |
| 12            | 1             | 0           | -3.014715               | 1.624555  | -0.954796 |
| 13            | 1             | 0           | -2.314293               | 2.380506  | 0.312097  |
| 14            | 7             | 0           | -0.253095               | 2.771503  | 0.067438  |
| 15            | 1             | 0           | 0.677371                | 3.166821  | 0.174730  |
| 16            | 7             | 0           | -2.686483               | -1.240135 | -0.404032 |
| 17            | 7             | 0           | -3.808384               | -1.383331 | 0.460247  |
| 18            | 1             | 0           | -0.338230               | -2.368250 | -0.007043 |
| 19            | 1             | 0           | -2.480246               | -2.130961 | -0.837688 |
| 20            | 1             | 0           | -4.196046               | -0.454566 | 0.595126  |
| 21            | 1             | 0           | -3.523027               | -1.724310 | 1.380149  |
| 22            | 1             | 0           | 4.919784                | 0.313515  | 0.249026  |
| 23            | 1             | 0           | 4.574859                | -1.256805 | 1.011253  |
| 24            | 1             | 0           | 4.714704                | -1.137580 | -0.759893 |
| 25            | 1             | 0           | 2.917992                | 1.775346  | 0.222259  |
| 26            | 1             | 0           | -1.556843               | -0.668851 | 1.268846  |



**Table S30:** Cartesian coordinates and energies of the optimized geometry of intermediate A (2<sup>nd</sup> isomer).

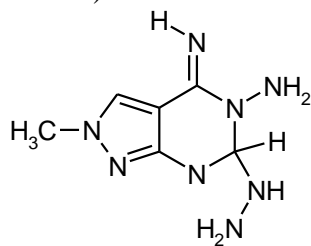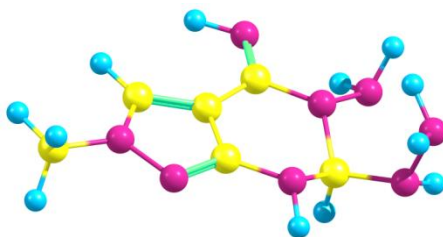

|                                               |                             |
|-----------------------------------------------|-----------------------------|
| Electronic Energy =                           | -673.996521242 a.u.         |
| Zero-point correction =                       | 0.213545 (Hartree/Particle) |
| Thermal correction to Energy =                | 0.226847                    |
| Thermal correction to Enthalpy =              | 0.227792                    |
| Thermal correction to Gibbs Free Energy =     | 0.174018                    |
| Sum of electronic and zero-point Energies =   | -673.782976                 |
| Sum of electronic and thermal Energies =      | -673.769674                 |
| Sum of electronic and thermal Enthalpies =    | -673.768730                 |
| Sum of electronic and thermal Free Energies = | -673.822503                 |

Standard orientation:

| Center Number | Atomic Number | Atomic Type | Coordinates (Angstroms) |           |           |
|---------------|---------------|-------------|-------------------------|-----------|-----------|
|               |               |             | X                       | Y         | Z         |
| 1             | 7             | 0           | -2.891536               | -0.260096 | 0.050921  |
| 2             | 6             | 0           | -2.251936               | 0.917140  | 0.159876  |
| 3             | 6             | 0           | -0.891174               | 0.649087  | 0.053466  |
| 4             | 6             | 0           | -0.830228               | -0.750638 | -0.119857 |
| 5             | 7             | 0           | -2.032220               | -1.314236 | -0.128248 |
| 6             | 6             | 0           | -4.323261               | -0.506346 | 0.083909  |
| 7             | 6             | 0           | 0.310672                | 1.466256  | 0.090185  |
| 8             | 7             | 0           | 1.490010                | 0.708089  | 0.011315  |
| 9             | 6             | 0           | 1.511926                | -0.631511 | -0.659051 |
| 10            | 7             | 0           | 0.372061                | -1.417108 | -0.211983 |
| 11            | 7             | 0           | 0.398626                | 2.750071  | 0.186085  |
| 12            | 7             | 0           | 2.675142                | 1.428833  | -0.294249 |
| 13            | 1             | 0           | 0.338386                | -2.333715 | -0.640513 |
| 14            | 1             | 0           | -0.528045               | 3.162853  | 0.261604  |
| 15            | 1             | 0           | 3.111309                | 1.705282  | 0.581968  |
| 16            | 1             | 0           | 2.393367                | 2.299177  | -0.746043 |
| 17            | 7             | 0           | 2.712744                | -1.380993 | -0.362487 |
| 18            | 7             | 0           | 3.014368                | -1.566869 | 1.024693  |
| 19            | 1             | 0           | 3.499893                | -0.907625 | -0.790034 |
| 20            | 1             | 0           | 2.718860                | -0.751098 | 1.562904  |
| 21            | 1             | 0           | 2.458461                | -2.348309 | 1.356201  |
| 22            | 1             | 0           | -2.791456               | 1.840257  | 0.300716  |
| 23            | 1             | 0           | -4.836308               | 0.440753  | 0.240045  |
| 24            | 1             | 0           | -4.564019               | -1.188903 | 0.900195  |
| 25            | 1             | 0           | -4.648215               | -0.944055 | -0.861303 |
| 26            | 1             | 0           | 1.517408                | -0.472369 | -1.749239 |

**Table S31:** Cartesian coordinates and energies of the optimized geometry of intermediate **A** (3<sup>rd</sup> isomer).

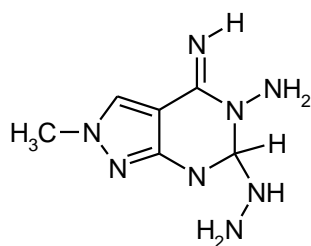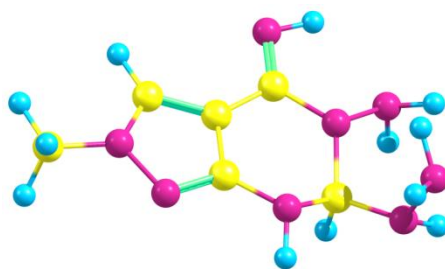

|                                               |                             |
|-----------------------------------------------|-----------------------------|
| Electronic Energy =                           | -673.994797906 a.u.         |
| Zero-point correction =                       | 0.213601 (Hartree/Particle) |
| Thermal correction to Energy =                | 0.226712                    |
| Thermal correction to Enthalpy =              | 0.227656                    |
| Thermal correction to Gibbs Free Energy =     | 0.174306                    |
| Sum of electronic and zero-point Energies =   | -673.781197                 |
| Sum of electronic and thermal Energies =      | -673.768086                 |
| Sum of electronic and thermal Enthalpies =    | -673.767142                 |
| Sum of electronic and thermal Free Energies = | -673.820492                 |

Standard orientation:

| Center Number | Atomic Number | Atomic Type | Coordinates (Angstroms) |           |           |
|---------------|---------------|-------------|-------------------------|-----------|-----------|
|               |               |             | X                       | Y         | Z         |
| 1             | 7             | 0           | -2.905506               | -0.246525 | 0.044264  |
| 2             | 6             | 0           | -2.262166               | 0.929225  | 0.158484  |
| 3             | 6             | 0           | -0.903486               | 0.656584  | 0.057796  |
| 4             | 6             | 0           | -0.844623               | -0.740223 | -0.118502 |
| 5             | 7             | 0           | -2.047820               | -1.302810 | -0.133135 |
| 6             | 6             | 0           | -4.337697               | -0.488887 | 0.068999  |
| 7             | 6             | 0           | 0.289569                | 1.481724  | 0.100835  |
| 8             | 7             | 0           | 1.484387                | 0.722248  | -0.004049 |
| 9             | 6             | 0           | 1.503844                | -0.634735 | -0.650356 |
| 10            | 7             | 0           | 0.357763                | -1.410286 | -0.203585 |
| 11            | 7             | 0           | 0.247061                | 2.756659  | 0.251022  |
| 12            | 7             | 0           | 2.620514                | 1.509913  | -0.277848 |
| 13            | 1             | 0           | 0.324804                | -2.330105 | -0.625341 |
| 14            | 1             | 0           | 1.200209                | 3.122042  | 0.228701  |
| 15            | 1             | 0           | 2.847695                | 1.503187  | -1.272099 |
| 16            | 1             | 0           | 3.418815                | 1.175351  | 0.248961  |
| 17            | 7             | 0           | 2.691718                | -1.392130 | -0.332155 |
| 18            | 7             | 0           | 3.011680                | -1.542448 | 1.051686  |
| 19            | 1             | 0           | 3.499286                | -1.030896 | -0.823721 |
| 20            | 1             | 0           | 2.704737                | -0.723636 | 1.578343  |
| 21            | 1             | 0           | 2.477482                | -2.328706 | 1.406933  |
| 22            | 1             | 0           | -2.791373               | 1.857860  | 0.297577  |
| 23            | 1             | 0           | -4.848536               | 0.459267  | 0.226364  |
| 24            | 1             | 0           | -4.585402               | -1.173737 | 0.881424  |
| 25            | 1             | 0           | -4.660224               | -0.921911 | -0.879349 |
| 26            | 1             | 0           | 1.521284                | -0.493179 | -1.744726 |

**Table S32.** Relative electronic ( $\Delta E$ , kcal/mol) and Gibbs free energies ( $\Delta G$ , kcal/mol) of various isomers (geometric isomers and conformers) of intermediate **A** in MeOH solution.<sup>a</sup>

| Isomer of intermediate <b>A</b> | $\Delta E$ | $\Delta G$ |
|---------------------------------|------------|------------|
| <b>1</b>                        | 4.00       | 3.91       |
| <b>2</b>                        | 0.00       | 0.00       |
| <b>3</b>                        | 1.08       | 1.26       |

<sup>a</sup> Calculated using data of Tables S29-S31.

**Comment:** the most stable isomer of intermediate **A** is number 2:

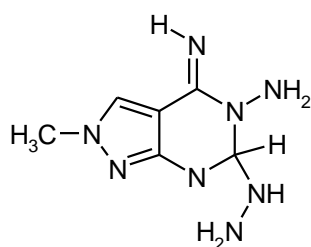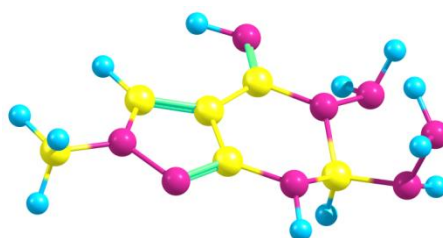

## Intermediates: Intermediate D

**Table S33:** Cartesian coordinates and energies of the optimized geometry of intermediate **D** (1<sup>st</sup> isomer).

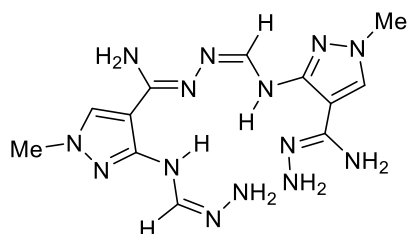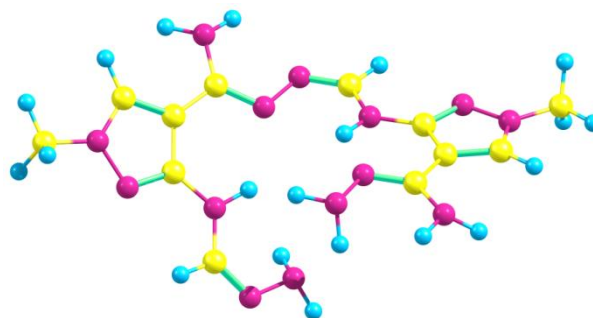

|                                               |                             |
|-----------------------------------------------|-----------------------------|
| Electronic Energy =                           | -1236.11440651 a.u.         |
| Zero-point correction =                       | 0.366808 (Hartree/Particle) |
| Thermal correction to Energy =                | 0.393829                    |
| Thermal correction to Enthalpy =              | 0.394774                    |
| Thermal correction to Gibbs Free Energy =     | 0.306474                    |
| Sum of electronic and zero-point Energies =   | -1235.747599                |
| Sum of electronic and thermal Energies =      | -1235.720577                |
| Sum of electronic and thermal Enthalpies =    | -1235.719633                |
| Sum of electronic and thermal Free Energies = | -1235.807932                |

### Standard orientation:

| Center Number | Atomic Number | Atomic Type | Coordinates (Angstroms) |           |           |
|---------------|---------------|-------------|-------------------------|-----------|-----------|
|               |               |             | X                       | Y         | Z         |
| 1             | 7             | 0           | -5.092677               | -0.038215 | -0.718057 |
| 2             | 6             | 0           | -4.424343               | -1.196554 | -0.846858 |
| 3             | 6             | 0           | -3.193541               | -1.043600 | -0.213923 |
| 4             | 6             | 0           | -3.232586               | 0.296291  | 0.271515  |
| 5             | 7             | 0           | -4.379398               | 0.897489  | -0.029704 |
| 6             | 6             | 0           | -6.412276               | 0.297884  | -1.225499 |
| 7             | 7             | 0           | -2.228627               | 0.913200  | 0.997960  |
| 8             | 6             | 0           | -2.266562               | 2.231837  | 1.399209  |
| 9             | 7             | 0           | -1.403576               | 2.821456  | 2.143555  |
| 10            | 7             | 0           | -0.310176               | 2.034638  | 2.561224  |
| 11            | 6             | 0           | -2.123829               | -2.017109 | -0.043879 |
| 12            | 7             | 0           | -2.390825               | -3.332032 | -0.328827 |
| 13            | 7             | 0           | -0.947775               | -1.586581 | 0.332853  |
| 14            | 7             | 0           | -0.043594               | -2.617616 | 0.599705  |
| 15            | 6             | 0           | 1.198084                | -2.276357 | 0.498743  |
| 16            | 7             | 0           | 1.669661                | -1.066337 | 0.078604  |
| 17            | 6             | 0           | 3.009557                | -0.731217 | -0.023376 |
| 18            | 6             | 0           | 3.512921                | 0.494573  | -0.546997 |
| 19            | 6             | 0           | 4.892540                | 0.350207  | -0.439455 |
| 20            | 7             | 0           | 5.133915                | -0.856641 | 0.104864  |
| 21            | 7             | 0           | 3.988234                | -1.541082 | 0.371105  |
| 22            | 6             | 0           | 2.740893                | 1.624044  | -1.062939 |
| 23            | 7             | 0           | 3.428736                | 2.774155  | -1.384216 |
| 24            | 7             | 0           | 1.464946                | 1.460953  | -1.224333 |
| 25            | 7             | 0           | 0.767196                | 2.594798  | -1.723353 |
| 26            | 6             | 0           | 6.419800                | -1.462895 | 0.405339  |
| 27            | 1             | 0           | -1.374221               | 0.362465  | 1.059647  |
| 28            | 1             | 0           | -0.604291               | 1.133786  | 2.942779  |
| 29            | 1             | 0           | 0.159774                | 2.541087  | 3.302030  |
| 30            | 1             | 0           | -1.671803               | -3.976397 | -0.024952 |
| 31            | 1             | 0           | -3.340066               | -3.656272 | -0.221669 |
| 32            | 1             | 0           | 1.024182                | -0.360933 | -0.271675 |
| 33            | 1             | 0           | 4.282049                | 2.985733  | -0.891797 |
| 34            | 1             | 0           | 2.895918                | 3.579308  | -1.672426 |
| 35            | 1             | 0           | 0.836518                | 3.376873  | -1.068185 |

|    |   |   |           |           |           |
|----|---|---|-----------|-----------|-----------|
| 36 | 1 | 0 | -0.212622 | 2.335665  | -1.746450 |
| 37 | 1 | 0 | -4.846838 | -2.033013 | -1.380514 |
| 38 | 1 | 0 | -6.829678 | -0.579108 | -1.716606 |
| 39 | 1 | 0 | -6.340516 | 1.116728  | -1.943189 |
| 40 | 1 | 0 | -7.061413 | 0.595298  | -0.400720 |
| 41 | 1 | 0 | -3.116108 | 2.807089  | 1.053305  |
| 42 | 1 | 0 | 1.947858  | -3.013522 | 0.760019  |
| 43 | 1 | 0 | 5.700184  | 1.007640  | -0.719246 |
| 44 | 1 | 0 | 7.206290  | -0.759733 | 0.137558  |
| 45 | 1 | 0 | 6.484404  | -1.690435 | 1.470453  |
| 46 | 1 | 0 | 6.544151  | -2.382174 | -0.169296 |

**Table S34:** Cartesian coordinates and energies of the optimized geometry of intermediate **D** (2<sup>nd</sup> isomer).

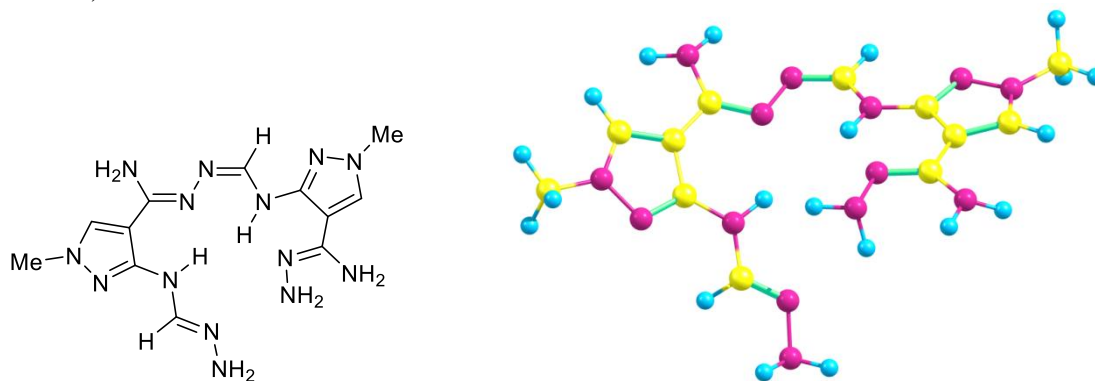

|                                               |                             |
|-----------------------------------------------|-----------------------------|
| Electronic Energy =                           | -1236.11160350 a.u.         |
| Zero-point correction =                       | 0.365737 (Hartree/Particle) |
| Thermal correction to Energy =                | 0.393157                    |
| Thermal correction to Enthalpy =              | 0.394102                    |
| Thermal correction to Gibbs Free Energy =     | 0.304531                    |
| Sum of electronic and zero-point Energies =   | -1235.745867                |
| Sum of electronic and thermal Energies =      | -1235.718446                |
| Sum of electronic and thermal Enthalpies =    | -1235.717502                |
| Sum of electronic and thermal Free Energies = | -1235.807072                |

Standard orientation:

| Center Number | Atomic Number | Atomic Type | Coordinates (Angstroms) |           |           |
|---------------|---------------|-------------|-------------------------|-----------|-----------|
|               |               |             | X                       | Y         | Z         |
| 1             | 7             | 0           | -5.064301               | -0.323477 | -0.681135 |
| 2             | 6             | 0           | -4.389280               | -1.484035 | -0.677814 |
| 3             | 6             | 0           | -3.130358               | -1.238224 | -0.135021 |
| 4             | 6             | 0           | -3.159973               | 0.159013  | 0.157946  |
| 5             | 7             | 0           | -4.326996               | 0.707086  | -0.174118 |
| 6             | 6             | 0           | -6.407333               | -0.068545 | -1.172430 |
| 7             | 7             | 0           | -2.130236               | 0.874713  | 0.728778  |
| 8             | 6             | 0           | -2.229317               | 2.179750  | 1.163288  |
| 9             | 7             | 0           | -1.228221               | 2.780717  | 1.680615  |
| 10            | 7             | 0           | -1.461942               | 4.076772  | 2.178755  |
| 11            | 6             | 0           | -2.048812               | -2.177922 | 0.120197  |
| 12            | 7             | 0           | -2.319206               | -3.520052 | 0.023714  |
| 13            | 7             | 0           | -0.859633               | -1.701827 | 0.388847  |
| 14            | 7             | 0           | 0.058913                | -2.692788 | 0.742330  |
| 15            | 6             | 0           | 1.294854                | -2.330571 | 0.640272  |
| 16            | 7             | 0           | 1.745709                | -1.134830 | 0.160151  |
| 17            | 6             | 0           | 3.077866                | -0.772546 | 0.056488  |
| 18            | 6             | 0           | 3.555012                | 0.451326  | -0.495886 |
| 19            | 6             | 0           | 4.937214                | 0.341601  | -0.380040 |
| 20            | 7             | 0           | 5.203931                | -0.845211 | 0.195646  |
| 21            | 7             | 0           | 4.073299                | -1.549660 | 0.474137  |
| 22            | 6             | 0           | 2.757971                | 1.548739  | -1.041853 |
| 23            | 7             | 0           | 3.420842                | 2.700856  | -1.405444 |

|    |   |   |           |           |           |
|----|---|---|-----------|-----------|-----------|
| 24 | 7 | 0 | 1.484239  | 1.355938  | -1.188943 |
| 25 | 7 | 0 | 0.760547  | 2.456399  | -1.723562 |
| 26 | 6 | 0 | 6.501942  | -1.413045 | 0.517884  |
| 27 | 1 | 0 | -1.269226 | 0.350345  | 0.861584  |
| 28 | 1 | 0 | -2.186883 | 4.573716  | 1.659716  |
| 29 | 1 | 0 | -0.598479 | 4.600637  | 2.094985  |
| 30 | 1 | 0 | -1.583368 | -4.115428 | 0.382390  |
| 31 | 1 | 0 | -3.260362 | -3.827111 | 0.217318  |
| 32 | 1 | 0 | 1.087923  | -0.458882 | -0.223529 |
| 33 | 1 | 0 | 4.274374  | 2.943924  | -0.928222 |
| 34 | 1 | 0 | 2.871117  | 3.486176  | -1.715670 |
| 35 | 1 | 0 | 0.821099  | 3.263532  | -1.098608 |
| 36 | 1 | 0 | -0.214347 | 2.177906  | -1.723283 |
| 37 | 1 | 0 | -4.828429 | -2.389920 | -1.064569 |
| 38 | 1 | 0 | -6.840121 | -1.009911 | -1.506095 |
| 39 | 1 | 0 | -6.375028 | 0.632904  | -2.007934 |
| 40 | 1 | 0 | -7.021084 | 0.349479  | -0.373152 |
| 41 | 1 | 0 | -3.211975 | 2.634983  | 1.034069  |
| 42 | 1 | 0 | 2.056163  | -3.033993 | 0.955454  |
| 43 | 1 | 0 | 5.731125  | 1.009967  | -0.673088 |
| 44 | 1 | 0 | 7.273462  | -0.701689 | 0.229142  |
| 45 | 1 | 0 | 6.568980  | -1.605162 | 1.589851  |
| 46 | 1 | 0 | 6.647736  | -2.347163 | -0.026957 |

**Table S35.** Relative electronic ( $\Delta E$ , kcal/mol) and Gibbs free energies ( $\Delta G$ , kcal/mol) of various isomers of intermediate **D** in MeOH solution.<sup>a</sup>

| Isomer of intermediate <b>D</b> | $\Delta E$ | $\Delta G$ |
|---------------------------------|------------|------------|
| <b>1</b>                        | 0.00       | 0.00       |
| <b>2</b>                        | 1.76       | 1.08       |

<sup>a</sup> Calculated using data of Tables S33-S34.

**Comment:** the most stable isomer of intermediate **A** is number 1:

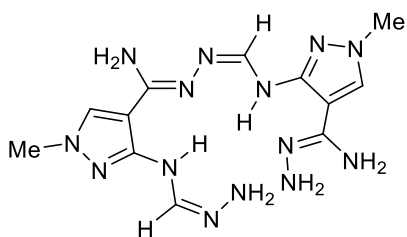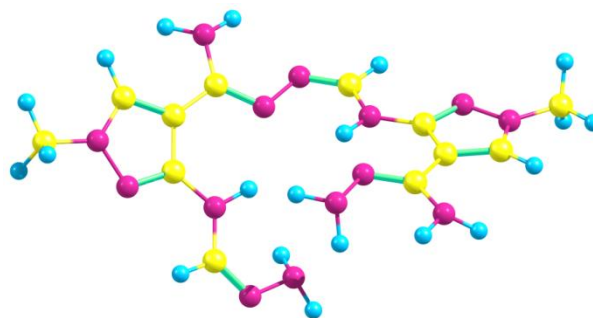

The hydrazine promoted transformation of pyrazolopyrimidine **8** into macrocycle **5**  
(MeOH solution)

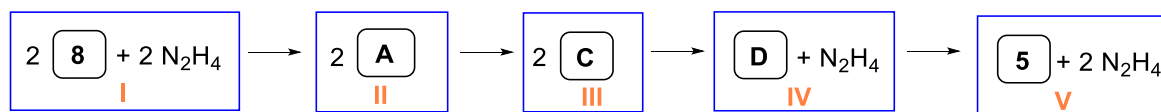

**Calculations:**

**System I:** 2×(E)-**8** + 2 N<sub>2</sub>H<sub>4</sub>

$$E = 2 \times (-562.08427749) + 2 \times (-111.918802464) = -1348.006159908 \text{ a.u. (0 kcal/mol)}$$

$$G = 2 \times (-561.963758) + 2 \times (-111.887454) = -1347.702424 \text{ a.u. (0 kcal/mol)}$$

**System II:** 2×(E)-**A**

$$E = 2 \times (-673.996521241) = -1347.993042482 \text{ a.u. (+8.23 kcal/mol)}$$

$$G = 2 \times (-673.822503) = -1347.645006 \text{ a.u. (+36.03 kcal/mol)}$$

**System III:** 2×**C**

$$E = 2 \times (-674.015849881) = -1348.031699762 \text{ a.u. (-16.03 kcal/mol)}$$

$$G = 2 \times (-673.847741) = -1347.695482 \text{ a.u. (+4.36 kcal/mol)}$$

**System IV:** **D** + N<sub>2</sub>H<sub>4</sub>

$$E = (-1236.11440651) + (-111.918802464) = -1348.033208974 \text{ a.u. (-16.97 kcal/mol)}$$

$$G = (-1235.807932) + (-111.887454) = -1347.695384 \text{ a.u. (+4.42 kcal/mol)}$$

**System V:** **5** + 2 N<sub>2</sub>H<sub>4</sub>

$$E = (-1124.19739243) + 2 \times (-111.918802464) = -1348.034997358 \text{ a.u. (-18.10 kcal/mol)}$$

$$G = (-1123.936916) + 2 \times (-111.887454) = -1347.711824 \text{ a.u. (-5.90 kcal/mol)}$$

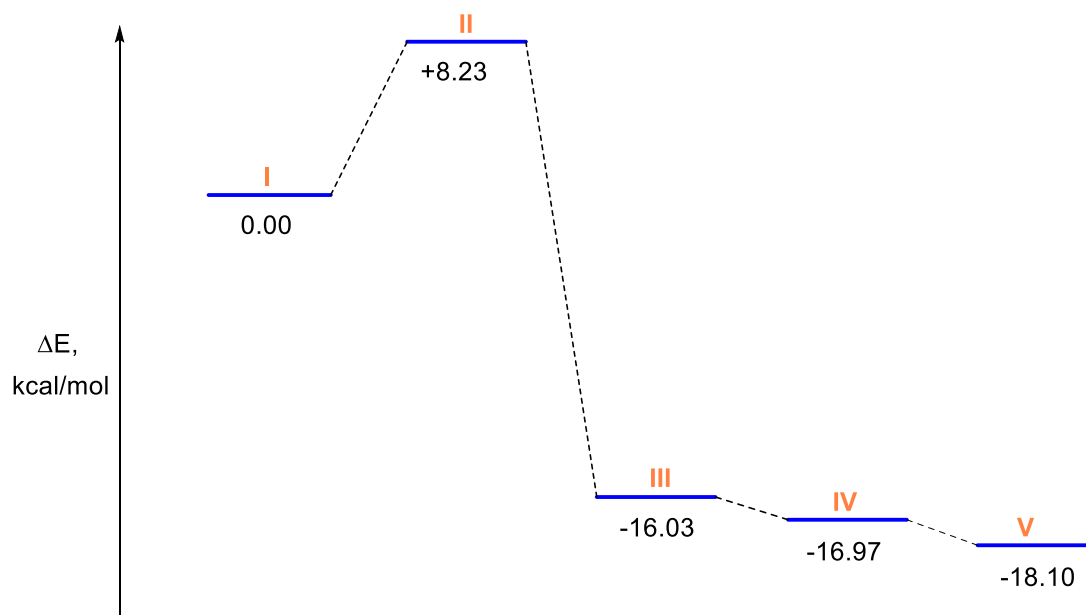

**Figure S3.** Energy diagram (B3LYP/6-311++G(d,p)) for the  $N_2H_4$ -promoted transformation of pyrazolopyrimidine (*E*)-**8** into macrocycle **5** in MeOH solution.

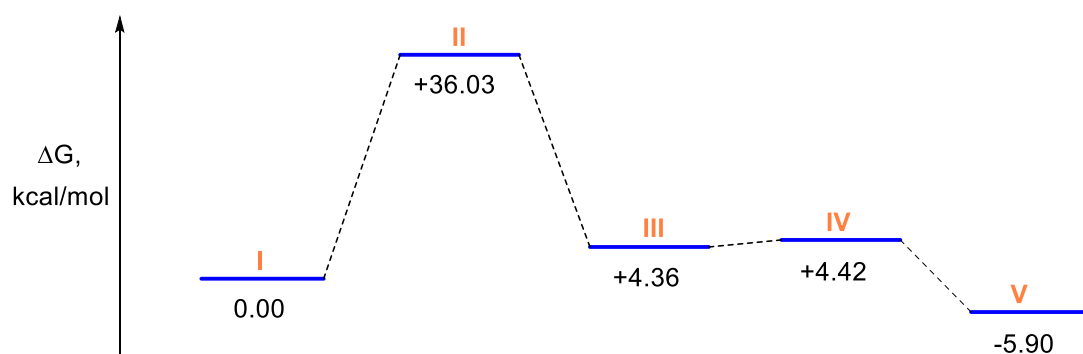

**Figure S4.** Gibbs free energy diagram (B3LYP/6-311++G(d,p)) for the  $N_2H_4$ -promoted transformation of pyrazolopyrimidine (*E*)-**8** into macrocycle **5** in MeOH solution. Free energies in kcal/mol at 298 K and 1 atm.



Attempt to prepare compound **11** by annulation of two 1,2,4-triazole rings onto the macrocyclic core of **5**. Synthesis of triazolo[1,5-*c*]pyrimidine **13**

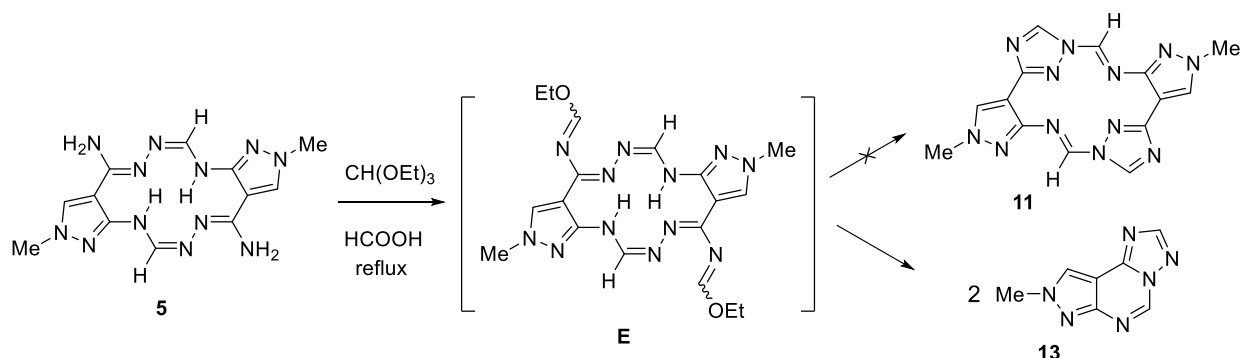

Unfortunately, our attempts to annulate two 1,2,4-triazole rings onto the macrocyclic core of **5** were unsuccessful. Particularly, reflux of macrocycle **5** in excess  $\text{CH}(\text{OEt})_3$  in the presence of  $\text{HCOOH}$  (2.5 equiv) for 8 h resulted in the formation of triazolo[1,5-*c*]pyrimidine **13** instead of the expected macrocycle **11**. The failure in the synthesis of compound **11** can be associated with difficulties in the annulation of the triazole rings due to the high conformational rigidity of macrocycle **5**. Indeed, this annulation should occur with a significant distortion of the original geometry of macrocycle **5**. The DFT B3LYP/6-311++G(d,p) calculations in DMSO showed that the 14-membered ring in **5**, which is almost planar (see, Table S9), would change to a bowl-like configuration in compound **11** (see, Table S36) along with significant change in many bond angles. Specifically, each of the 1,2,4-triazole rings in **11** is rotated at an angle of  $\approx 30$  degrees relative to its coupled pyrazole ring.

**Table S36:** Cartesian coordinates and energies of the optimized geometry of compound **11** in DMSO.

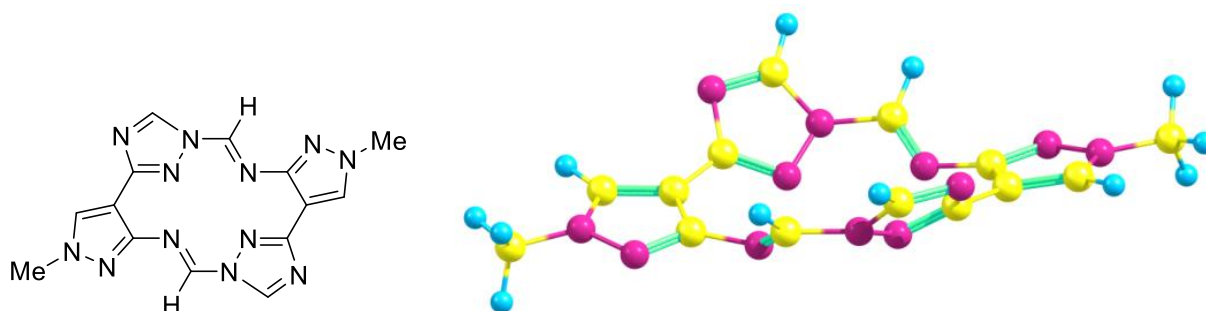

|                                             |                             |
|---------------------------------------------|-----------------------------|
| Electronic Energy =                         | -1197.94397409 a.u.         |
| Zero-point correction =                     | 0.278185 (Hartree/Particle) |
| Thermal correction to Energy =              | 0.299008                    |
| Thermal correction to Enthalpy =            | 0.299952                    |
| Thermal correction to Gibbs Free Energy =   | 0.225413                    |
| Sum of electronic and zero-point Energies = | -1197.665789                |
| Sum of electronic and thermal Energies =    | -1197.644966                |

Sum of electronic and thermal Enthalpies = -1197.644022

Sum of electronic and thermal Free Energies = -1197.718561

Standard orientation:

| Center<br>Number | Atomic<br>Number | Atomic<br>Type | Coordinates (Angstroms) |           |           |
|------------------|------------------|----------------|-------------------------|-----------|-----------|
|                  |                  |                | X                       | Y         | Z         |
| 1                | 6                | 0              | 2.093814                | 1.696656  | -0.047809 |
| 2                | 7                | 0              | 0.909873                | 1.489054  | 0.488673  |
| 3                | 6                | 0              | -1.286681               | 2.205263  | -0.151166 |
| 4                | 7                | 0              | -1.754103               | 1.233614  | 0.498613  |
| 5                | 6                | 0              | -3.005986               | 0.661339  | 0.353373  |
| 6                | 6                | 0              | -3.179574               | -0.746992 | 0.160993  |
| 7                | 6                | 0              | -2.096840               | -1.706154 | -0.041184 |
| 8                | 7                | 0              | -0.922314               | -1.520258 | 0.523065  |
| 9                | 7                | 0              | -0.114417               | -2.429774 | -0.094167 |
| 10               | 6                | 0              | 1.282117                | -2.185660 | -0.153148 |
| 11               | 7                | 0              | 1.757617                | -1.248201 | 0.540182  |
| 12               | 6                | 0              | 3.006192                | -0.668564 | 0.368295  |
| 13               | 6                | 0              | 3.175028                | 0.736626  | 0.150998  |
| 14               | 7                | 0              | 2.127857                | 2.774366  | -0.921490 |
| 15               | 6                | 0              | 0.882413                | 3.188056  | -0.936865 |
| 16               | 7                | 0              | 0.114548                | 2.427865  | -0.096776 |
| 17               | 6                | 0              | -0.869333               | -3.154312 | -0.977767 |
| 18               | 7                | 0              | -2.115455               | -2.746013 | -0.960741 |
| 19               | 6                | 0              | 4.547030                | 0.888186  | 0.029957  |
| 20               | 6                | 0              | -4.551977               | -0.897671 | 0.049469  |
| 21               | 7                | 0              | 4.175084                | -1.302355 | 0.396434  |
| 22               | 7                | 0              | 5.103159                | -0.331779 | 0.194387  |
| 23               | 6                | 0              | 6.518394                | -0.667555 | 0.231829  |
| 24               | 7                | 0              | -4.174261               | 1.298228  | 0.377645  |
| 25               | 7                | 0              | -5.104443               | 0.326739  | 0.197795  |
| 26               | 6                | 0              | -6.519155               | 0.664924  | 0.239850  |
| 27               | 1                | 0              | -1.808522               | 2.868286  | -0.843332 |
| 28               | 1                | 0              | 1.799455                | -2.799651 | -0.892398 |
| 29               | 1                | 0              | 0.481672                | 4.000030  | -1.524742 |
| 30               | 1                | 0              | -0.457425               | -3.937372 | -1.596381 |
| 31               | 1                | 0              | 5.148131                | 1.764670  | -0.151728 |
| 32               | 1                | 0              | -5.156737               | -1.775092 | -0.114700 |
| 33               | 1                | 0              | 7.091882                | 0.216725  | -0.039714 |
| 34               | 1                | 0              | 6.802403                | -0.991031 | 1.234618  |
| 35               | 1                | 0              | 6.725054                | -1.466946 | -0.480117 |
| 36               | 1                | 0              | -6.796406               | 1.001550  | 1.240170  |
| 37               | 1                | 0              | -6.728750               | 1.455495  | -0.480968 |
| 38               | 1                | 0              | -7.095438               | -0.221910 | -0.016999 |

The calculations also showed that stability of compound **11** is much lower than that of two equivalents of compound **13** (Table S36 vs Table S37) ( $\Delta E = 39.89$  kcal/mol and  $\Delta G = 50.18$  kcal/mol).

**Table S37:** Cartesian coordinates and energies of the optimized geometry of compound **13** in DMSO.

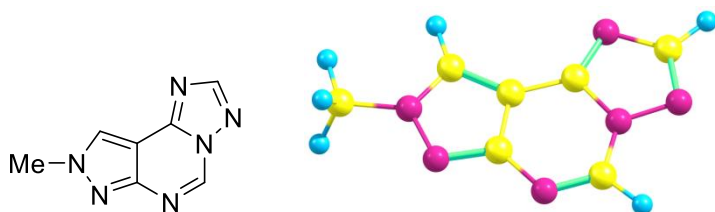

|                                               |                             |
|-----------------------------------------------|-----------------------------|
| Electronic Energy =                           | -599.003772570 a.u.         |
| Zero-point correction =                       | 0.139647 (Hartree/Particle) |
| Thermal correction to Energy =                | 0.148816                    |
| Thermal correction to Enthalpy =              | 0.149761                    |
| Thermal correction to Gibbs Free Energy =     | 0.104509                    |
| Sum of electronic and zero-point Energies =   | -598.864126                 |
| Sum of electronic and thermal Energies =      | -598.854956                 |
| Sum of electronic and thermal Enthalpies =    | -598.854012                 |
| Sum of electronic and thermal Free Energies = | -598.899263                 |

Standard orientation:

| Center Number | Atomic Number | Atomic Type | Coordinates (Angstroms) |           |           |
|---------------|---------------|-------------|-------------------------|-----------|-----------|
|               |               |             | X                       | Y         | Z         |
| 1             | 6             | 0           | 3.952136                | -0.611928 | -0.000003 |
| 2             | 7             | 0           | 2.525689                | -0.306286 | 0.000000  |
| 3             | 6             | 0           | 1.510212                | -1.195643 | 0.000004  |
| 4             | 6             | 0           | 0.344551                | -0.440483 | 0.000005  |
| 5             | 6             | 0           | 0.792403                | 0.914818  | 0.000004  |
| 6             | 7             | 0           | 2.127287                | 0.983061  | -0.000001 |
| 7             | 6             | 0           | -1.056914               | -0.656099 | 0.000001  |
| 8             | 7             | 0           | -1.817282               | 0.499883  | -0.000002 |
| 9             | 6             | 0           | -1.297464               | 1.780867  | -0.000002 |
| 10            | 7             | 0           | -0.028255               | 2.017435  | 0.000002  |
| 11            | 7             | 0           | -1.860793               | -1.709843 | -0.000000 |
| 12            | 6             | 0           | -3.103620               | -1.146243 | -0.000001 |
| 13            | 7             | 0           | -3.145870               | 0.174215  | -0.000001 |
| 14            | 1             | 0           | 4.076124                | -1.692586 | 0.000002  |
| 15            | 1             | 0           | 4.414467                | -0.187463 | 0.890891  |
| 16            | 1             | 0           | 4.414462                | -0.187474 | -0.890906 |
| 17            | 1             | 0           | 1.681502                | -2.259085 | -0.000004 |
| 18            | 1             | 0           | -2.029807               | 2.578957  | -0.000002 |
| 19            | 1             | 0           | -4.009993               | -1.733333 | -0.000002 |

Based on the above data, we proposed that macrocycle **5** reacts with CH(OEt)<sub>3</sub> initially at the NH<sub>2</sub> groups, but the resulting product, imidate **E**, is converted faster into compound **13** than into compound **11**. Relatively low stability and tendency to disintegration of the macrocyclic ring in **5** can be explained by its somewhat anti-aromatic character.

## References

- 1 *Gaussian 16, Revision A.03*, Frisch, M. J.; Trucks, G. W.; Schlegel, H. B.; Scuseria, G. E.; Robb, M. A.; Cheeseman, J. R.; Scalmani, G.; Barone, V.; Petersson, G. A.; Nakatsuji, H.; Li, X.; Caricato, M.; Marenich, A. V.; Bloino, J.; Janesko, B. G.; Gomperts, R.; Mennucci, B.; Hratchian, H. P.; Ortiz, J. V.; Izmaylov, A. F.; Sonnenberg, J. L.; Williams-Young, D.; Ding, F.; Lipparini, F.; Egidi, F.; Goings, J.; Peng, B.; Petrone, A.; Henderson, T.; Ranasinghe, D.; Zakrzewski, V. G.; Gao, J.; Rega, N.; Zheng, G.; Liang, W.; Hada, M.; Ehara, M.; Toyota, K.; Fukuda, R.; Hasegawa, J.; Ishida, M.; Nakajima, T.; Honda, Y.; Kitao, O.; Nakai, H.; Vreven, T.; Throssell, K.; Montgomery, J. A., Jr.; Peralta, J. E.; Ogliaro, F.; Bearpark, M. J.; Heyd, J. J.; Brothers, E. N.; Kudin, K. N.; Staroverov, V. N.; Keith, T. A.; Kobayashi, R.; Normand, J.; Raghavachari, K.; Rendell, A. P.; Burant, J. C.; Iyengar, S. S.; Tomasi, J.; Cossi, M.; Millam, J. M.; Klene, M.; Adamo, C.; Cammi, R.; Ochterski, J. W.; Martin, R. L.; Morokuma, K.; Farkas, O.; Foresman, J. B.; Fox, D. J. Gaussian, Inc., Wallingford CT, 2016.
- 2 Sarotti, A. M.; Pellegrinet, S. C. *J. Org. Chem.* **2009**, *74*, 7254–7260.
